# Supplementary material for: Unveiling the Diversity and Modifications of Short Peptides in Buthus martensii Scorpion Venom through Liquid Chromatography-High Resolution Mass Spectrometry
Source: MDPI journal article supplement (doi:10.3390/toxins16030155), 2024-03-16
Supplement: s1 [file s1]

# Unveiling the Diversity and Modifications of Short Peptides in *Buthus martensii* Scorpion Venom through Liquid Chromatography-High Resolution Mass Spectrometry

Ling Zeng, Cangman Zhang, Mingrong Yang, Jianfeng Sun, Jingguang Lu, Huixia Zhang, Jianfeng Qin, Wei Zhang and Zhihong Jiang

Supplementary Figures and Tables

|                                  |      |
|----------------------------------|------|
| Supplementary Table 1.....       | 2~5  |
| Supplementary Table 2.....       | 6    |
| Supplementary Figures 1~156..... | 7~54 |

Supplementary Table 1. List of de novo sequencing peptides in the filtrate of scorpion *Buthus martensii* Karsch venom.

| No.                                    | Ion for                 | RT    | MS<br>observed | Delta<br>(Da) | sequence                     |
|----------------------------------------|-------------------------|-------|----------------|---------------|------------------------------|
|                                        | MS/MS (m/z)<br>(charge) |       |                |               |                              |
| N-terminal modification                |                         |       |                |               |                              |
| 1                                      | 432.1483(+1)            | 9.32  | 431.1405       | 0.0036        | Carboxybenzoyl-AGH           |
| 2                                      | 497.2501(+1)            | 21.70 | 496.2423       | 0.0011        | Bz-ARF                       |
| 3                                      | 554.2719(+1)            | 19.92 | 553.2641       | 0.0008        | Bz-ARFG                      |
| 4                                      | 535.2359(+1)            | 20.63 | 534.2281       | 0.0059        | Bz-A FGH                     |
| 5                                      | 641.2937(+1)            | 22.71 | 640.2859       | 0.0007        | pEDWI/LP                     |
| 6                                      | 728.3301(+1)            | 21.05 | 727.3223       | -0.0051       | pEDWI/LPS                    |
| 7                                      | 335.2074(+1)            | 14.13 | 334.1996       | 0.0009        | FGI- NH <sub>2</sub> ♦       |
| C-terminal modification                |                         |       |                |               |                              |
| 8                                      | 431.2364(+1)            | 10.92 | 430.2286       | 0.0043        | WVGA- NH <sub>2</sub>        |
| 9                                      | 438.2336(+1)            | 6.68  | 437.2258       | 0.0016        | YVTG- NH <sub>2</sub>        |
| 10                                     | 562.2607(+1)            | 8.20  | 561.2529       | 0.0018        | DKWD- NH <sub>2</sub>        |
| 11                                     | 569.3072(+1)            | 19.91 | 568.2994       | 0.0015        | SFGFI/L - NH <sub>2</sub>    |
| 12                                     | 321.1942 (+3)           | 2.08  | 960.5592       | 0.0215        | I/LFQAI/LKNE-NH <sub>2</sub> |
| N-terminal and C-terminal modification |                         |       |                |               |                              |
| 13                                     | 496.2648(+1)            | 20.22 | 495.2570       | 0.0019        | Bz-ARF-NH <sub>2</sub>       |
| Non-modification                       |                         |       |                |               |                              |
| 14                                     | 507.2428(+1)            | 12.81 | 506.2350       | 0.0076        | FFGH                         |
| 15                                     | 309.7041 (+2)           | 7.84  | 617.3926       | 0.0002        | KVI/LKM                      |
| 16                                     | 317.6992(+2)            | 1.73  | 633.3828       | 0.0045        | KVI/LKM(oxidation)           |
| 17                                     | 320.1854(+2)            | 19.74 | 638.3552       | 0.0022        | FRFGI/L                      |
| 18                                     | 321.1544(+2)            | 16.86 | 640.2932       | 0.0069        | FRFGD                        |
| 19                                     | 321.73 60(+2)           | 13.14 | 641.4564       | 0.0014        | I/LR I/LI/LK                 |
| 20                                     | 337.1757 (+2)           | 17.75 | 672.3358       | 0.0015        | FFRFG                        |
| 21                                     | 337.1757 (+1)           | 19.63 | 672.3358       | 0.0015        | FRFGF                        |
| 22                                     | 359.2374(+2)            | 11.73 | 716.4592       | 0.0016        | KVIKMV #                     |
| 23                                     | 364.2619(+2)            | 10.40 | 726.5082       | 0.0023        | I/LVKVI/LR                   |
| 24                                     | 371.2672 (+2)           | 13.18 | 740.5188       | 0.0074        | VI/LRI/LI/LK                 |
| 25                                     | 389.704 (+2)            | 9.47  | 777.3924       | 0.0026        | TPSYI/LPT                    |
| 26                                     | 785.4411(+1)            | 18.36 | 784.4333       | 0.0008        | I/LI/LPDAI/LSG               |
| 27                                     | 413.2751 (+2)           | 18.04 | 824.5346       | 0.0015        | I/LLEI/LIPK                  |
| 28                                     | 413.2713 (+2)           | 21.35 | 824.5270       | 0.0091        | I/LEI/LKI/LI/LP              |
| 29                                     | 430.265 (+2)            | 9.78  | 858.5144       | 0.0020        | KIVDGI/LKS                   |
| 30                                     | 431.2126 (+2)           | 18.37 | 860.4096       | 0.0074        | WLDKWN                       |
| 31                                     | 290.5471 (+3)           | 9.64  | 868.6179       | 0.0027        | VI/LRI/LI/LKK                |
| 32                                     | 435.7661 (+2)           | 17.65 | 869.5166       | 0.0044        | I/LAEKI/LLSP                 |
| 33                                     | 438.7600 (+2)           | 15.07 | 875.5044       | 0.0062        | FATKLI/LPS                   |
| 34                                     | 306.1918 (+3)           | 9.90  | 915.5520       | 0.0006        | I/LKKVWKD                    |
| 35                                     | 477.3446 (+2)           | 17.82 | 952.6736       | -0.0064       | I/LVKVI/LRI/LI/L             |

|                                     |                   |               |       |           |        |                            |
|-------------------------------------|-------------------|---------------|-------|-----------|--------|----------------------------|
| Peptides matching with the database | 36                | 477.3304(+2)  | 18.74 | 952.6452  | 0.0029 | KI/LNKI/LI/LPK             |
|                                     | 37                | 361.2627 (+3) | 10.82 | 1080.7647 | 0.0084 | I/LVKVI/LRI/LI/LK          |
|                                     | 38                | 303.2243 (+4) | 12.55 | 1208.8660 | 0.0016 | I/LVKVIRI/LIKK             |
|                                     | Modified peptides |               |       |           |        |                            |
|                                     | 39                | 278.186(+1)   | 10.36 | 277.1782  | 0.0003 | IF-NH <sub>2</sub> ♦       |
|                                     | 40                | 278.1883(+1)  | 9.67  | 277.1805  | 0.0020 | FI/L-NH <sub>2</sub>       |
|                                     | 41                | 293.1612(+1)  | 5.87  | 292.1534  | 0.0004 | FGA-NH <sub>2</sub>        |
|                                     | 42                | 293.1951(+1)  | 2.05  | 292.1873  | 0.0021 | FK-NH <sub>2</sub>         |
|                                     | 43                | 294.1452(+1)  | 6.05  | 293.1374  | 0.0004 | EF-NH <sub>2</sub>         |
|                                     | 44                | 319.1429(+1)  | 6.78  | 318.1351  | 0.0028 | WD-NH <sub>2</sub>         |
|                                     | 45                | 391.2695(+1)  | 18.07 | 390.2617  | 0.0009 | I/LI/LF-NH <sub>2</sub>    |
|                                     | 46                | 425.251(+1)   | 19.55 | 424.2432  | 0.0037 | FI/LF-NH <sub>2</sub>      |
|                                     | 47                | 429.281(+1)   | 9.44  | 428.2732  | 0.0009 | IGAVA-NH <sub>2</sub> *    |
|                                     | 48                | 468.272(+1)   | 14.22 | 467.2642  | 0.0002 | FRF-NH <sub>2</sub>        |
|                                     | 49                | 576.3456(+1)  | 13.74 | 575.3378  | 0.0048 | FI/LGAGI/L-NH <sub>2</sub> |
|                                     | 50                | 576.3528(+1)  | 15.89 | 575.3450  | 0.0024 | FIGAVA-NH <sub>2</sub> *   |
|                                     | 51                | 291.1788(+1)  | 16.36 | 580.3420  | 0.0055 | I/LFRF-NH <sub>2</sub>     |
|                                     | 52                | 339.2201 (+1) | 12.91 | 676.4246  | 0.0015 | LISAFK-NH <sub>2</sub> *   |
|                                     | 53                | 699.4399(+1)  | 16.93 | 698.4321  | 0.0000 | LIPSAIS-NH <sub>2</sub> *  |
|                                     | Non-modification  |               |       |           |        |                            |
|                                     | 54                | 231.1684(+1)  | 6.33  | 230.1606  | 0.0019 | I/LV                       |
|                                     | 55                | 245.184(+1)   | 12.04 | 244.1762  | 0.0020 | I/LI/L                     |
|                                     | 56                | 253.116(+1)   | 8.98  | 252.1082  | 0.0023 | FS                         |
|                                     | 57                | 279.173(+1)   | 16.14 | 278.1652  | 0.0027 | FI/L                       |
|                                     | 58                | 279.1732(+1)  | 16.33 | 278.1654  | 0.0029 | IF ♦                       |
|                                     | 59                | 281.1107(+1)  | 3.48  | 280.1029  | 0.0025 | FD                         |
|                                     | 60                | 281.1109(+1)  | 4.46  | 280.1031  | 0.0023 | DF                         |
|                                     | 61                | 294.1421(+1)  | 3.27  | 293.1343  | 0.0027 | FQ                         |
|                                     | 62                | 295.1647(+1)  | 11.75 | 294.1569  | 0.0005 | YI/L                       |
|                                     | 63                | 304.1656(+1)  | 13.66 | 303.1578  | 0.0000 | VW                         |
|                                     | 64                | 313.1593(+1)  | 16.84 | 312.1515  | 0.0046 | FF                         |
|                                     | 65                | 318.1778(+1)  | 15.69 | 317.1700  | 0.0034 | WI/L                       |
|                                     | 66                | 318.1778(+1)  | 15.92 | 317.1700  | 0.0034 | I/LW                       |
|                                     | 67                | 318.1778(+1)  | 17.15 | 317.1700  | 0.0034 | I/LW                       |
|                                     | 68                | 320.1279(+1)  | 7.86  | 319.1201  | 0.0038 | WD                         |
|                                     | 69                | 322.1905(+1)  | 3.66  | 321.1827  | 0.0031 | FR                         |
|                                     | 70                | 332.2187(+1)  | 8.68  | 331.2109  | 0.0007 | LLS ♦                      |
|                                     | 71                | 336.1888(+1)  | 12.58 | 335.1810  | 0.0030 | FI/LG                      |
|                                     | 72                | 342.2393(+1)  | 14.66 | 341.2315  | 0.0006 | I/LI/LP                    |
|                                     | 73                | 360.1635(+1)  | 12.23 | 359.1557  | 0.0031 | FGH                        |
|                                     | 74                | 360.213(+1)   | 11.94 | 359.2052  | 0.0001 | I/LI/LD                    |
|                                     | 75                | 366.1989(+1)  | 13.76 | 365.1911  | 0.0034 | I/LFS                      |
|                                     | 76                | 366.1989(+1)  | 18.27 | 365.1911  | 0.0034 | I/LSF                      |
|                                     | 77                | 366.2000(+1)  | 23.33 | 365.1944  | 0.0001 | FSI/L                      |

|     |               |       |          |        |            |
|-----|---------------|-------|----------|--------|------------|
| 78  | 366.2017(+1)  | 9.02  | 365.1939 | 0.0006 | YI/LA      |
| 79  | 377.1816(+1)  | 11.24 | 376.1738 | 0.0003 | FNP        |
| 80  | 378.1667(+1)  | 11.02 | 377.1589 | 0.0007 | FDP        |
| 81  | 392.2173(+1)  | 13.43 | 391.2095 | 0.0007 | YI/LP      |
| 82  | 392.2527(+1)  | 21.76 | 391.2449 | 0.0017 | I/LFI/L    |
| 83  | 400.1903(+1)  | 18.78 | 399.1825 | 0.0036 | FSF        |
| 84  | 403.259(+1)   | 11.55 | 402.2512 | 0.0039 | I/LI/LSA   |
| 85  | 407.2331(+1)  | 14.14 | 406.2253 | 0.0042 | FIGA ♦     |
| 86  | 407.2641(+1)  | 16.13 | 406.2563 | 0.0012 | FI/LK      |
| 87  | 415.2385(+1)  | 17.45 | 414.2307 | 0.0045 | WI/LP      |
| 88  | 420.2245(+1)  | 8.16  | 419.2167 | 0.0004 | WKS        |
| 89  | 426.2440(+1)  | 22.46 | 425.2362 | 0.0053 | FLF ♦      |
| 90  | 429.2700(+1)  | 12.48 | 428.2628 | 0.0002 | I/LI/LPS   |
| 91  | 431.2516(+1)  | 13.78 | 430.2438 | 0.0016 | I/LI/LDA   |
| 92  | 433.2087(+1)  | 16.46 | 432.2009 | 0.0005 | WI/LD      |
| 93  | 435.2712(+1)  | 10.24 | 434.2634 | 0.0002 | LFR ♦      |
| 94  | 441.2485(+1)  | 19.56 | 440.2407 | 0.0011 | FKF        |
| 95  | 445.3008(+1)  | 20.64 | 444.2930 | 0.0013 | I/LI/LSI/L |
| 96  | 227.6713(+2)  | 19.54 | 453.3270 | 0.0016 | I/LFKF     |
| 97  | 469.2563(+1)  | 16.65 | 468.2485 | 0.0005 | FRF        |
| 98  | 469.2611(+1)  | 15.66 | 468.2533 | 0.0053 | FFR        |
| 99  | 479.2845(+1)  | 21.92 | 478.2767 | 0.0019 | I/LFSI/L   |
| 100 | 479.2850(+1)  | 20.66 | 478.2772 | 0.0014 | I/LI/LSF   |
| 101 | 479.2800(+1)  | 19.3  | 478.2767 | 0.0019 | I/LI/LFS   |
| 102 | 483.2086(+1)  | 8.54  | 482.2008 | 0.0000 | FTTD       |
| 103 | 493.2657(+1)  | 11.23 | 492.2579 | 0.0000 | YI/LPT     |
| 104 | 494.2300(+1)  | 5.15  | 493.2281 | 0.0001 | GRFD       |
| 105 | 500.3072(+1)  | 14.05 | 499.2994 | 0.0013 | LIPSA*     |
| 106 | 502.2668(+1)  | 15.53 | 501.2590 | 0.0008 | WLPS ♦     |
| 107 | 506.2949 (+1) | 17.76 | 505.2871 | 0.0024 | FIGAV*     |
| 108 | 513.2692(+1)  | 23.87 | 512.2614 | 0.0016 | FI/LSF     |
| 109 | 513.2731(+1)  | 21.03 | 512.2653 | 0.0023 | FLFS ♦     |
| 110 | 513.275(+1)   | 22.36 | 512.2672 | 0.0042 | FSI/LF     |
| 111 | 513.2755(+1)  | 21.34 | 512.2677 | 0.0047 | I/LFSF     |
| 112 | 260.1513(+2)  | 8.17  | 518.2870 | 0.0022 | VWSK       |
| 113 | 520.3459(+1)  | 19.14 | 519.3381 | 0.0034 | I/LFI/LK   |
| 114 | 522.3276(+1)  | 10.75 | 521.3198 | 0.0010 | I/LVYK     |
| 115 | 526.276(+1)   | 15.23 | 525.2682 | 0.0012 | FRFG       |
| 116 | 529.2715(+1)  | 17.17 | 528.2637 | 0.0058 | YI/LFS     |
| 117 | 541.2648(+1)  | 21.44 | 540.2570 | 0.0009 | FI/LFD     |
| 118 | 541.2648(+1)  | 24.67 | 540.2570 | 0.0009 | FI/LDF     |
| 119 | 545.3302(+1)  | 10.14 | 544.3224 | 0.0009 | IIQTA*     |
| 120 | 550.3227(+1)  | 20.08 | 549.3149 | 0.0009 | LISAF*     |
| 121 | 554.2716(+1)  | 20.68 | 553.2638 | 0.0107 | FPSFG      |



|     |               |       |           |        |                |
|-----|---------------|-------|-----------|--------|----------------|
| 122 | 554.3302(+1)  | 19.34 | 553.3224  | 0.0035 | LFFK◆          |
| 123 | 279.1857(+2)  | 11.32 | 556.3558  | 0.0016 | KIIPS*         |
| 124 | 296.1894(+2)  | 6.75  | 590.3632  | 0.0010 | I/LRFR         |
| 125 | 307.1578 (+2) | 13.26 | 612.3000  | 0.0009 | FRFGS*         |
| 126 | 307.2200(+2)  | 16.84 | 612.4286  | 0.0026 | VI/LRI/LI/L    |
| 127 | 309.6851(+2)  | 12.06 | 617.3546  | 0.0013 | IMKNI*         |
| 128 | 634.3594(+1)  | 16.23 | 633.3516  | 0.0035 | FIGAVAG*       |
| 129 | 321.7094(+2)  | 12.65 | 641.4032  | 0.0080 | ATKIIP*        |
| 130 | 324.1973(+2)  | 6.97  | 646.3790  | 0.0002 | KVWKS*         |
| 131 | 326.1894 (+2) | 12.56 | 650.3632  | 0.0003 | LLKDY*         |
| 132 | 337.2224(+2)  | 12.74 | 672.4292  | 0.0021 | LKKVW*         |
| 133 | 697.4512(+1)  | 23.17 | 696.4434  | 0.0018 | LEILIP*        |
| 134 | 365.2312(+2)  | 10.94 | 728.4468  | 0.0036 | ATKIIPS*       |
| 135 | 378.2532(+2)  | 13.48 | 754.4908  | 0.0035 | LATKIIP*       |
| 136 | 379.2250(+1)  | 14.34 | 756.4344  | 0.0027 | ATKI/LI/LPD    |
| 137 | 757.4463(+1)  | 17.23 | 756.4385  | 0.0009 | LIPSAISC*      |
| 138 | 380.6880(+2)  | 18.97 | 759.3620  | 0.0039 | FGVFGSF        |
| 139 | 380.6923(+2)  | 20.23 | 759.3690  | 0.0004 | FRFGSF*        |
| 140 | 391.2316(+2)  | 10.84 | 780.4476  | 0.0007 | IIQTAVH*       |
| 141 | 785.4413(+1)  | 18.68 | 784.4335  | 0.0010 | I/LI/LPSAI/LDG |
| 142 | 416.257(+2)   | 11.75 | 830.4988  | 0.0020 | VWWSKLA*       |
| 143 | 421.7700(+2)  | 15.67 | 841.5404  | 0.0019 | LATKIIPS*      |
| 144 | 844.4780(+1)  | 19.98 | 843.4702  | 0.0005 | SLIPSALSG*     |
| 145 | 292.5047(+3)  | 8.08  | 874.4907  | 0.0022 | IMKNIKE*       |
| 146 | 296.1683(+3)  | 6.84  | 885.4815  | 0.0009 | GLREKHF*#      |
| 147 | 444.7862 (+2) | 5.36  | 887.5568  | 0.0014 | LKKVWKS*#      |
| 148 | 303.8552 (+3) | 7.87  | 908.5422  | 0.0007 | IIQTAVKH*      |
| 149 | 478.3125 (+2) | 18.96 | 954.6094  | 0.0009 | LATKIIPSL*#    |
| 150 | 991.5486(+1)  | 22.84 | 990.5408  | 0.0028 | FSLIPSALSG*#   |
| 151 | 338.8542(+3)  | 2.06  | 1013.5392 | 0.0002 | GLREKHFQ       |
| 152 | 546.2400(+2)  | 21.56 | 1090.4768 | 0.0040 | DNDIEEPFI/L    |
| 153 | 553.7953(+2)  | 15.57 | 1105.5750 | 0.0006 | YAVPEGLT*RT*   |
| 154 | 410.9301(+3)  | 19.75 | 1229.7669 | 0.0062 | LFKLATKIIPS*   |
| 155 | 439.5852(+3)  | 11.57 | 1315.7322 | 0.0010 | NIKEKLT*EVKD*  |
| 156 | 354.2274(+4)  | 6.55  | 1412.8784 | 0.0021 | KLRSGKQLLKD*   |

I/L means Leucine or Isoleucine. I/L refers to Leucine or Isoleucine. The identified I/L in the sequence confirmed by ETD-HCD-MS3 are indicated with #, those confirmed by HCD-MSn are indicated with ◆, and those identified through Mascot search are denoted with \*.

Supplementary Table 2. De novo sequence peptides matching with the sequences of MASCOT research.

| Mass     | De novo sequence              | MASCOT sequence         | Range | Matched Toxins |
|----------|-------------------------------|-------------------------|-------|----------------|
| 650.3698 | I/LI/LKDY                     | LLKDY                   | 47-52 | BmKbpp         |
| 672.452  | I/LKKVW                       | LKKVW                   | 29-33 | BmKbpp         |
| 830.5062 | VWFSKI/LA                     | VWFSKLA                 | 42-48 | BmKbpp         |
| 887.5524 | LKKVWKS                       | LKKVWKS                 | 29-35 | BmKbpp         |
| 1412.887 | KI/LRSKGKQI/LI/LKD            | KLRSKGKQLLKD            | 40-51 | BmKbpp         |
| 556.3673 | KI/LI/LPS                     | KIIPS                   | 34-38 | marcin-18      |
| 641.411  | ATKI/LI/LP                    | ATKIIP                  | 32-37 | marcin-18      |
| 728.4546 | ATKI/LI/LPS                   | ATKIIPS                 | 32-38 | marcin-18      |
| 754.4922 | I/LATKI/LI/LP                 | LATKIIP                 | 31-37 | marcin-18      |
| 841.5322 | I/LATKI/LI/LPS                | LATKIIPS                | 31-38 | marcin-18      |
| 954.6122 | I/LATKI/LIPSI/L               | LATKIIPSL               | 31-39 | marcin-18      |
| 1229.775 | I/LFKLATKI/LI/LPS             | LFKLATKIIPS             | 28-38 | marcin-18      |
| 499.3072 | I/LI/LPSA                     | LIPSA                   | 27-31 | toxin peptide  |
| 549.3227 | I/LI/LSAF                     | LISAF                   | 35-39 | toxin peptide  |
| 676.4122 | I/LI/LSAFK-NH <sub>2</sub>    | LISAFK-NH <sub>2</sub>  | 35-40 | toxin peptide  |
| 756.4463 | I/LI/LPSAI/LSG                | LIPSAISG                | 27-34 | toxin peptide  |
| 843.478  | SI/LI/LPSAI/LSG               | SLIPSAISG               | 26-34 | toxin peptide  |
| 698.4399 | I/LI/LPSAI/LS-NH <sub>2</sub> | LIPSAIS-NH <sub>2</sub> | 27-33 | toxin peptide  |
| 990.5486 | FSLIPSAI/LSG                  | FSLIPSAISG              | 25-34 | toxin peptide  |
| 428.281  | I/LGAVA-NH <sub>2</sub>       | IGAVA-NH <sub>2</sub>   | 25-29 | BmKn1          |
| 505.2924 | FI/LGAV                       | FIGAV                   | 24-28 | BmKn1          |
| 575.3528 | FI/LGAVA-NH <sub>2</sub>      | FIGAVA-NH <sub>2</sub>  | 24-29 | BmKn1          |
| 633.3594 | FI/LGAVAG                     | FIGAVAG                 | 24-30 | BmKn1          |
| 544.3302 | I/LI/LQTA                     | IIQTA                   | 42-46 | BmTXK-beta-2   |
| 780.4554 | I/LLQTAVH                     | IIQTAVH                 | 42-48 | BmTXK-beta-2   |
| 885.4893 | GLREKHF                       | GLREKHF                 | 20-27 | BmTXK-beta-2   |
| 908.5548 | I/LI/LQTAVKH                  | IIQTAVHK                | 42-49 | BmTXK-beta-2   |
| 1013.534 | GI/LREKHFQ                    | GLREKHFQ                | 20-28 | BmTXK-beta-2   |
| 1105.583 | YAVPEGTI/LRT                  | YAVPEGTLRT              | 32-41 | BmTXK-beta-2   |
| 617.3624 | I/LMKNI/L                     | IMKNI                   | 28-32 | BmTXK-beta     |
| 874.509  | I/LMKNI/LKE                   | IMKNIKE                 | 28-34 | BmTXK-beta     |
| 1315.741 | NI/LKEKI/LTEVKD               | NIKEKLTEVKD             | 31-41 | BmTXK-beta     |

I/L: Leucine or Isolucine

Supplementary Figure 1~156

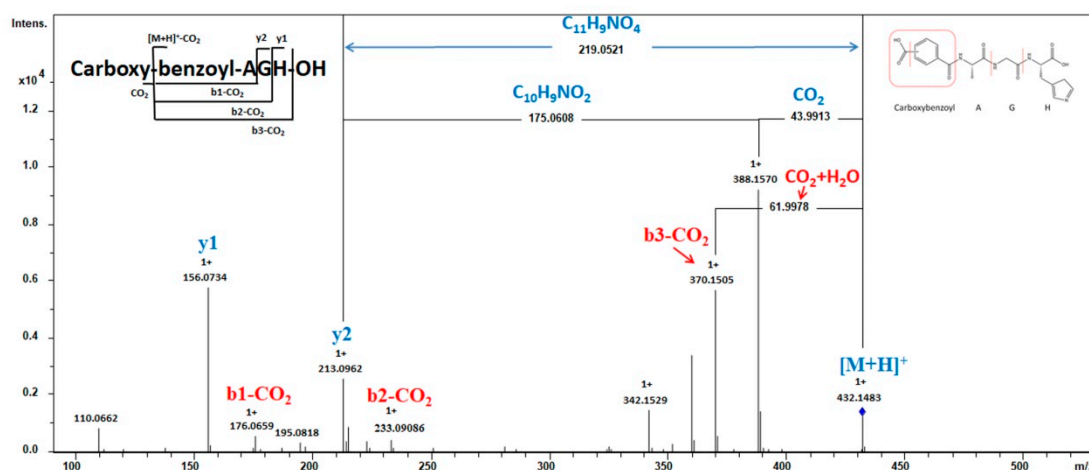

Supplementary Figure 1. Mass spectra and de novo sequencing analysis of carboxybenzoyl-AGH.

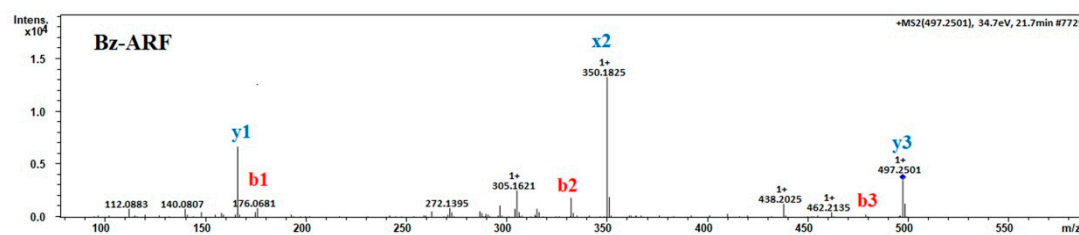

Supplementary Figure 2. Mass spectra and de novo sequencing analysis of Bz-ARF-NH<sub>2</sub>

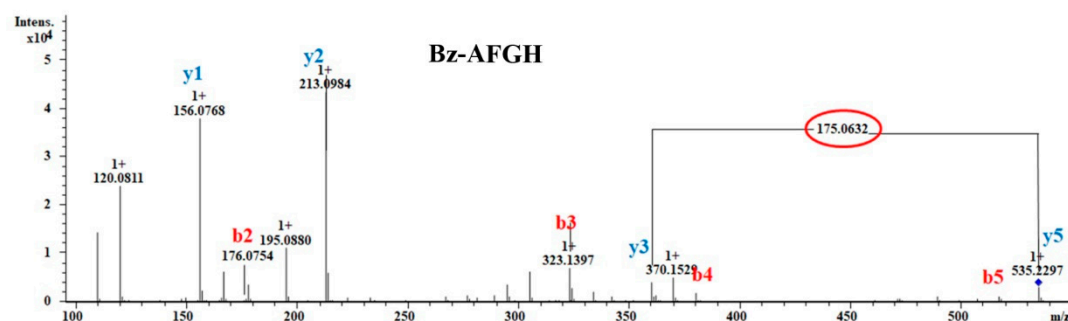

Supplementary Figure 3. Mass spectra and de novo sequencing analysis of Bz-AFGH

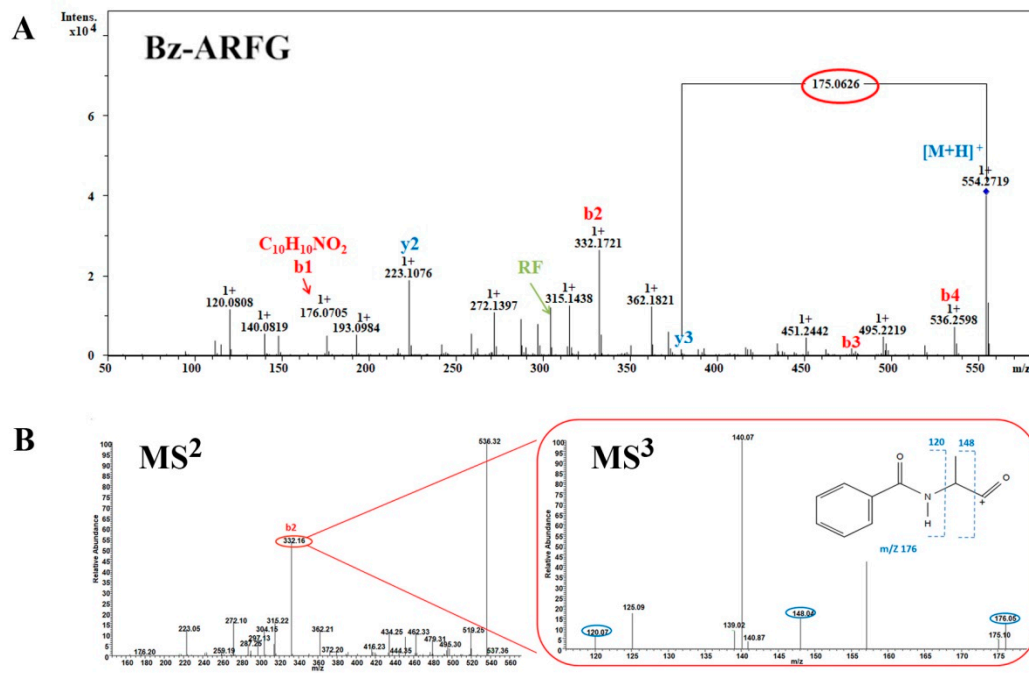

Supplementary Figure 4. Mass spectra and de novo sequencing analysis of Bz-ARFG

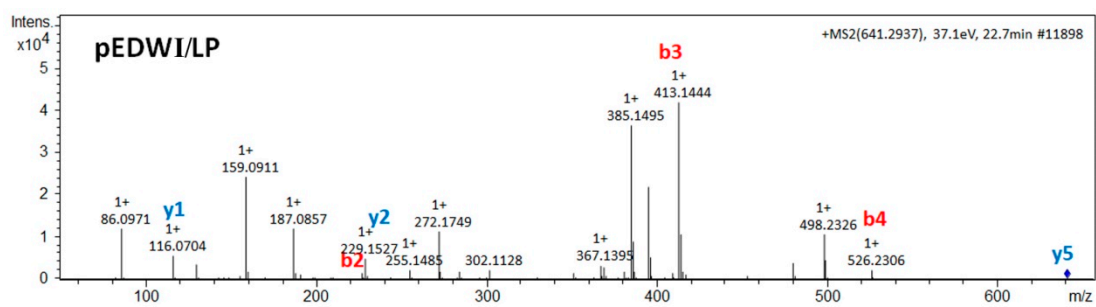

Supplementary Figure 5. Mass spectra and de novo sequencing analysis of pEDWI/LP

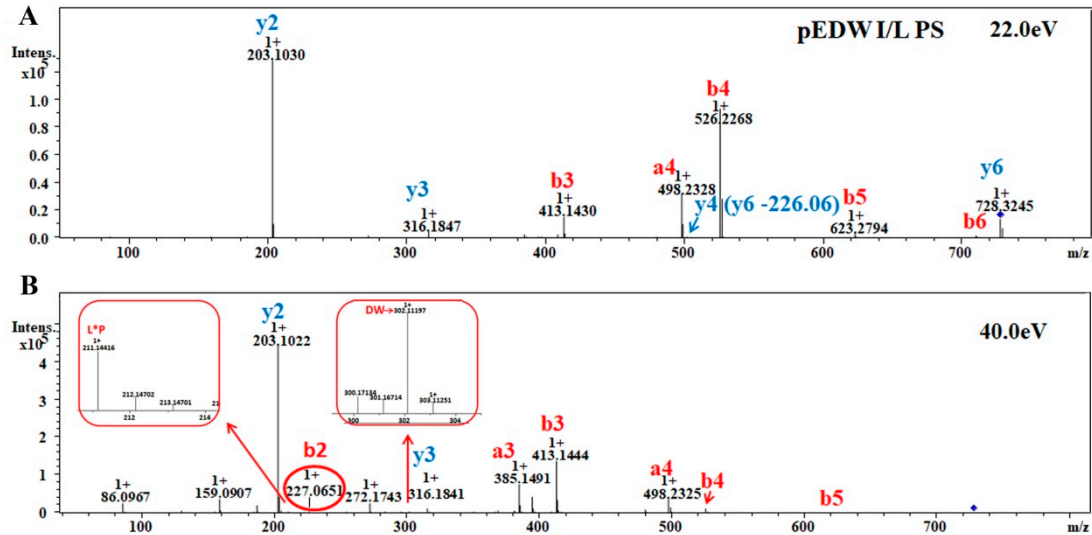

Supplementary Figure 6. Mass spectra and de novo sequencing analysis of pEDWI/LPS

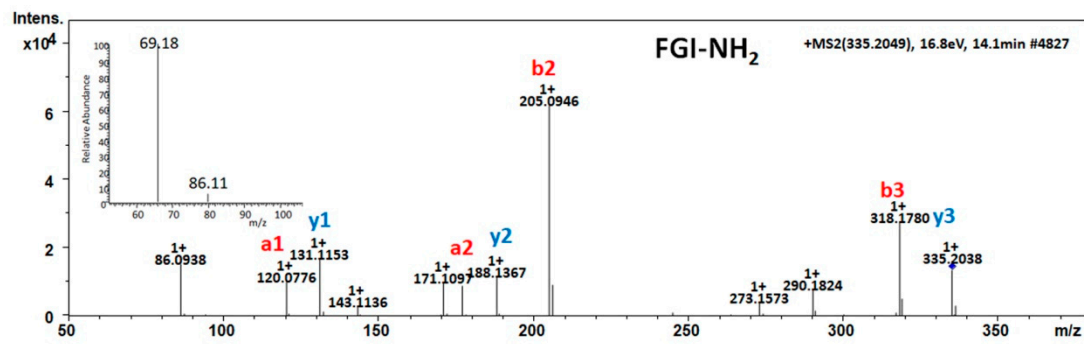

Supplementary Figure 7. Mass spectra and de novo sequencing analysis of FGI-NH<sub>2</sub>

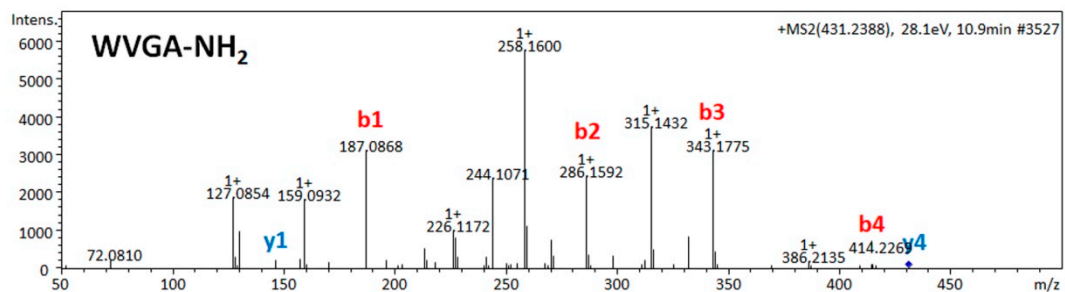

Supplementary Figure 8. Mass spectra and de novo sequencing analysis of WVGA-NH<sub>2</sub>

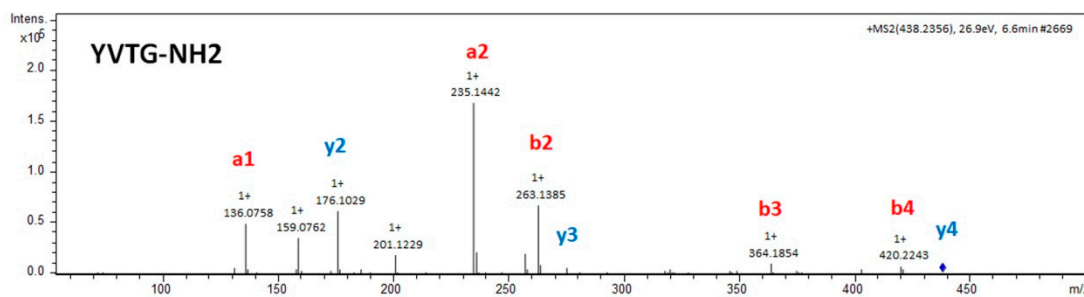

Supplementary Figure 9. Mass spectra and de novo sequencing analysis of YVTG-NH<sub>2</sub>

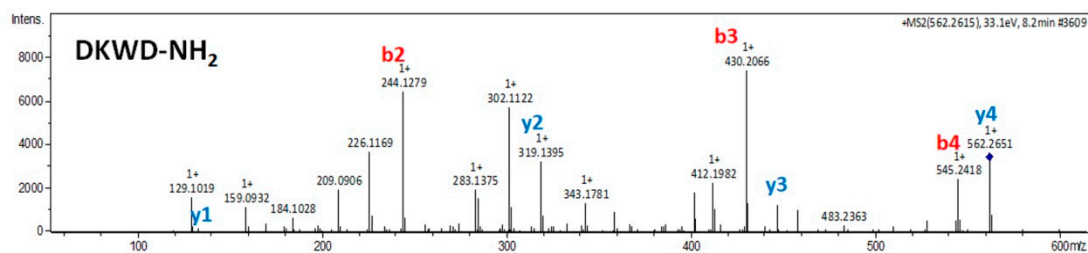

Supplementary Figure 10. Mass spectra and de novo sequencing analysis of DKWD-NH<sub>2</sub>

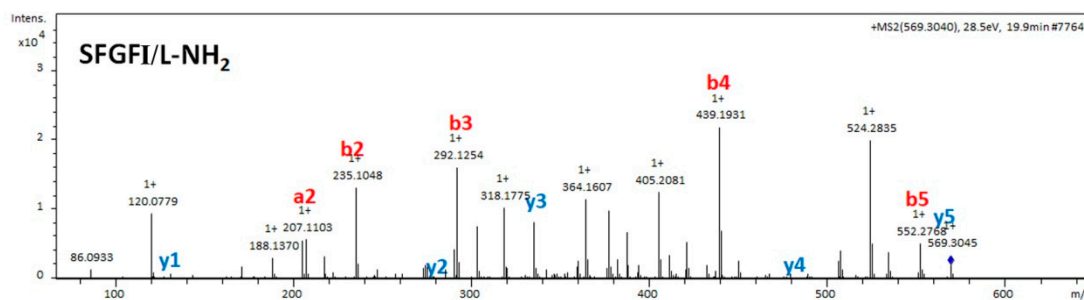

Supplementary Figure 11. Mass spectra and de novo sequencing analysis of SFGFI/L-NH<sub>2</sub>

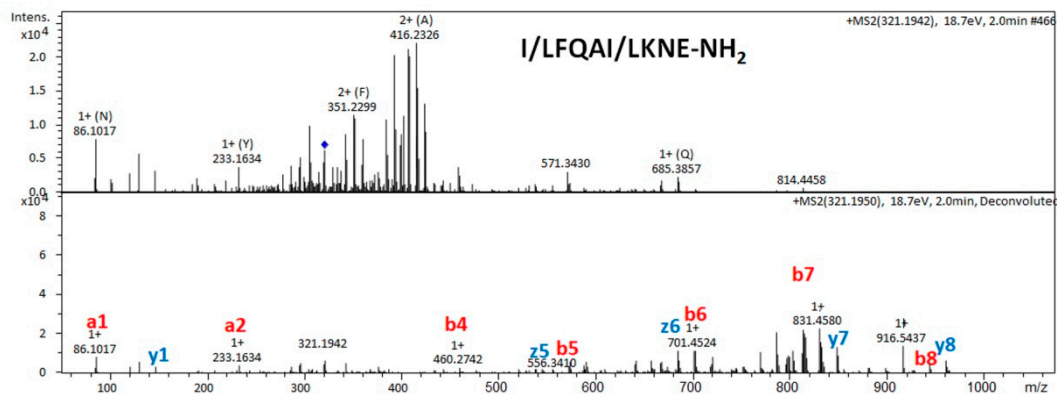

Supplementary Figure 12. Mass spectra and de novo sequencing analysis of  
I/LFQAI/LKNE-NH<sub>2</sub>

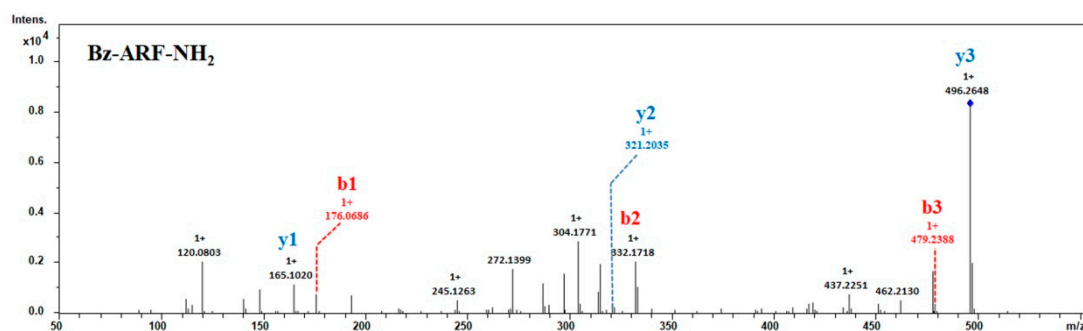

Supplementary Figure 13. Mass spectra and de novo sequencing analysis of  
Bz-ARF-NH<sub>2</sub>

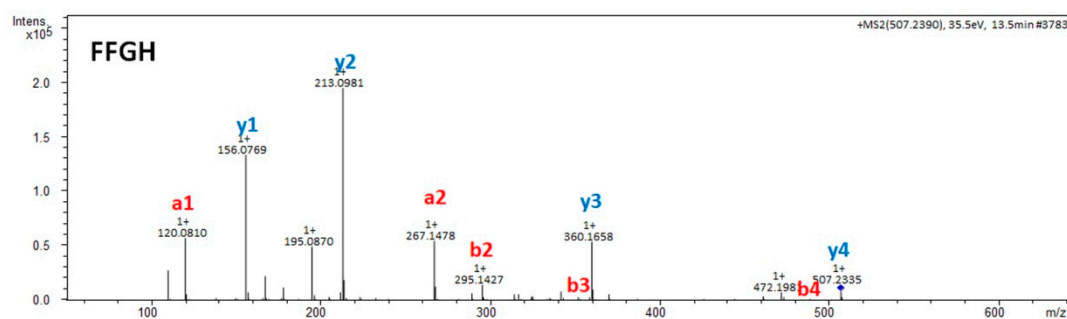

Supplementary Figure 14. Mass spectra and de novo sequencing analysis of  
FFGH

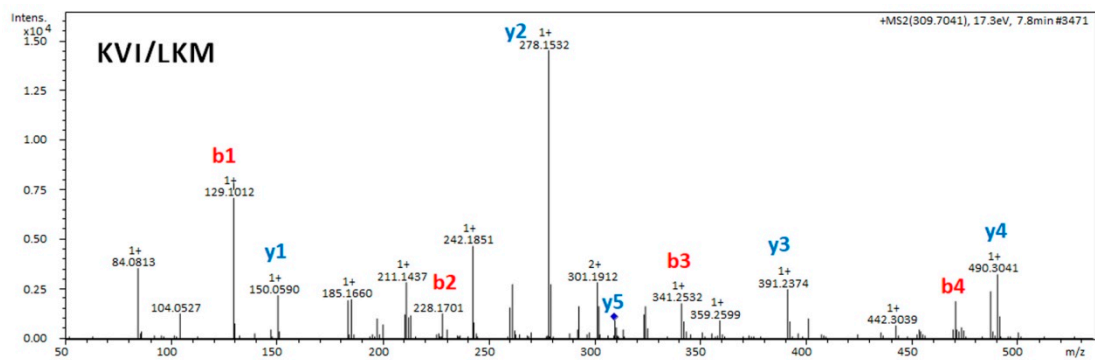

Supplementary Figure 15. Mass spectra and de novo sequencing analysis of  
KVI/LKM

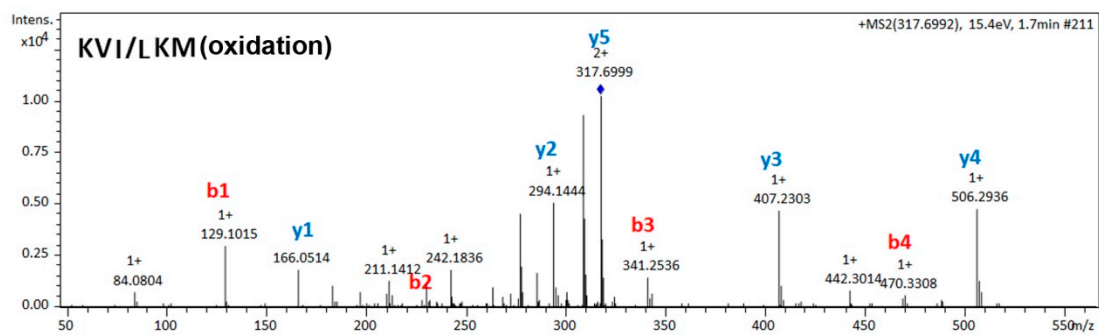

Supplementary Figure 16. Mass spectra and de novo sequencing analysis of  
KVI/LKM(oxidation)

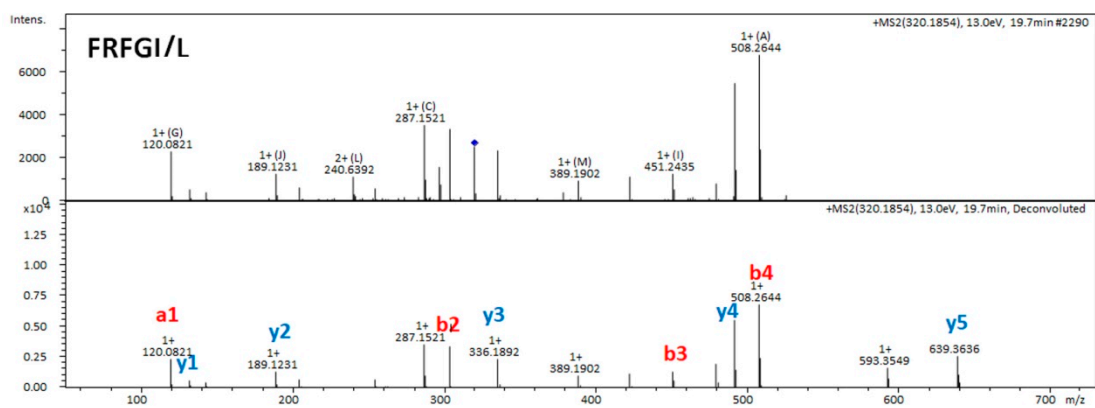

Supplementary Figure 17. Mass spectra and de novo sequencing analysis of



## FRFGI/L

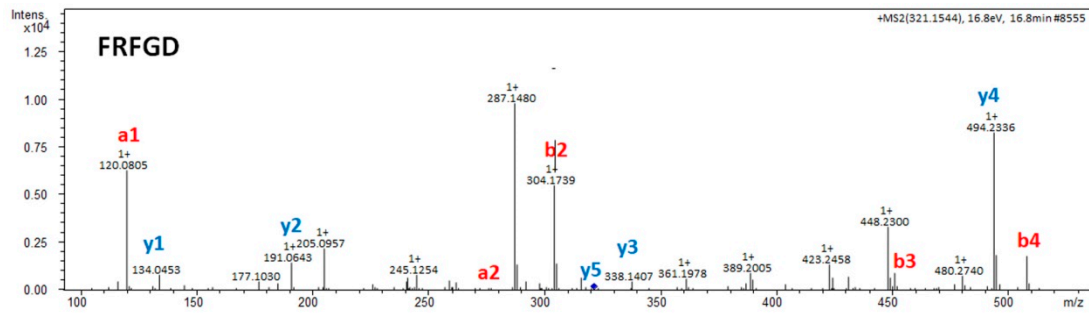

Supplementary Figure 18. Mass spectra and de novo sequencing analysis of

## FRFGD

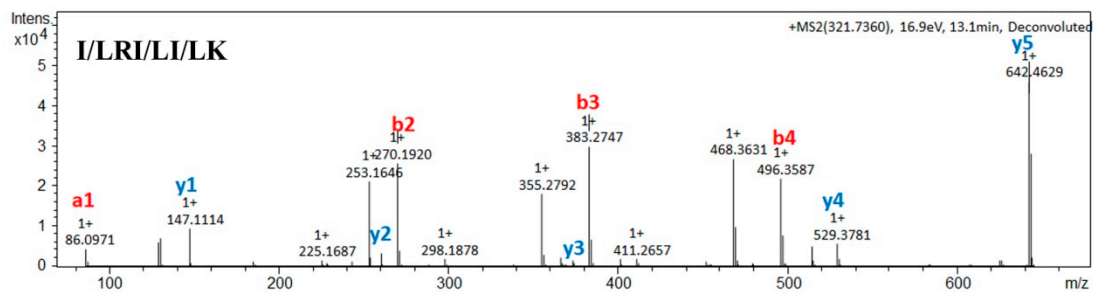

Supplementary Figure 19. Mass spectra and de novo sequencing analysis of

## I/LRI/LI/LK

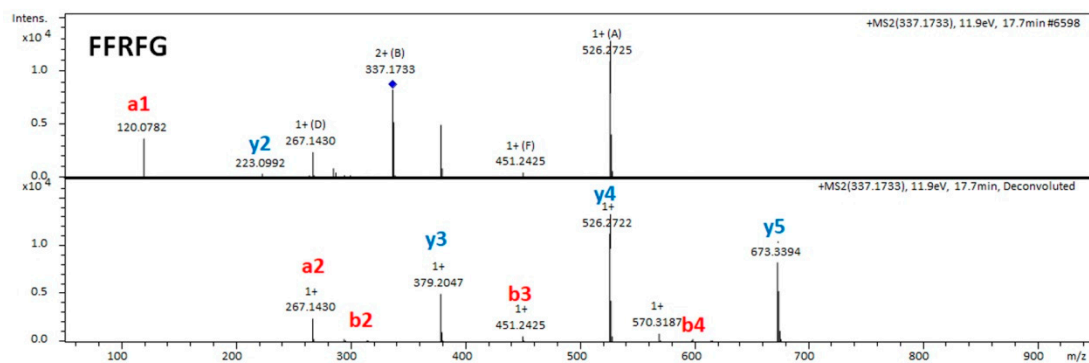

Supplementary Figure 20. Mass spectra and de novo sequencing analysis of

## FFRFG

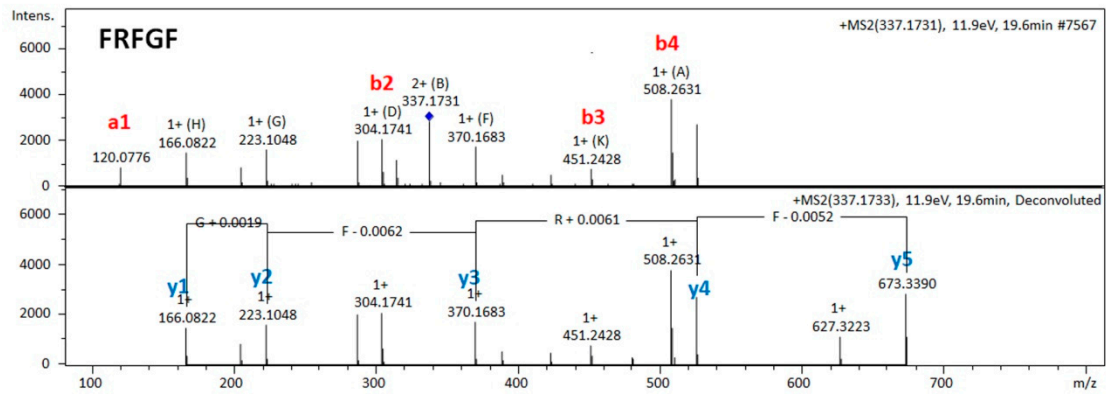

Supplementary Figure 21. Mass spectra and de novo sequencing analysis of

## FFRFG

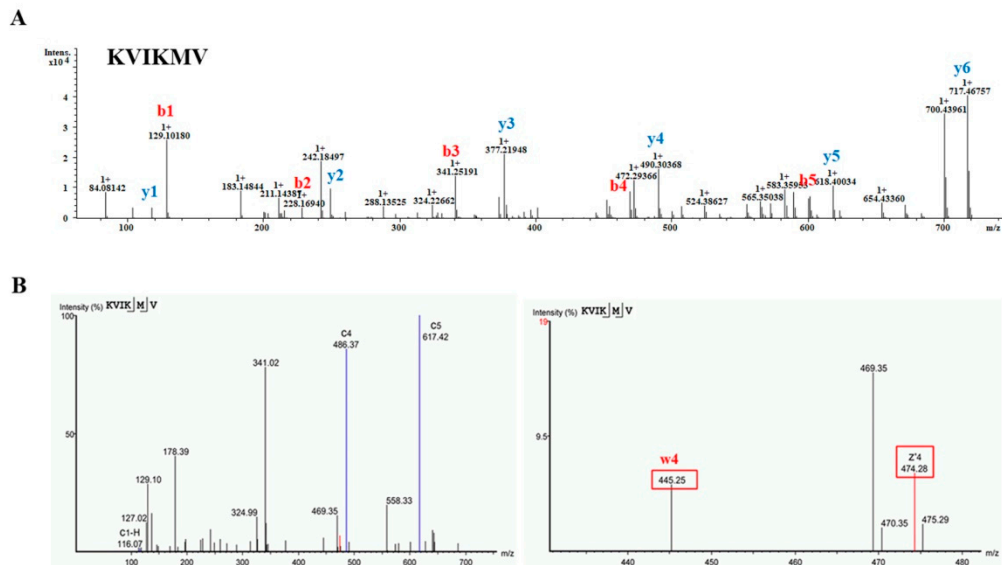

Supplementary Figure 22. Mass spectra and de novo sequencing analysis of

## KVIKMV

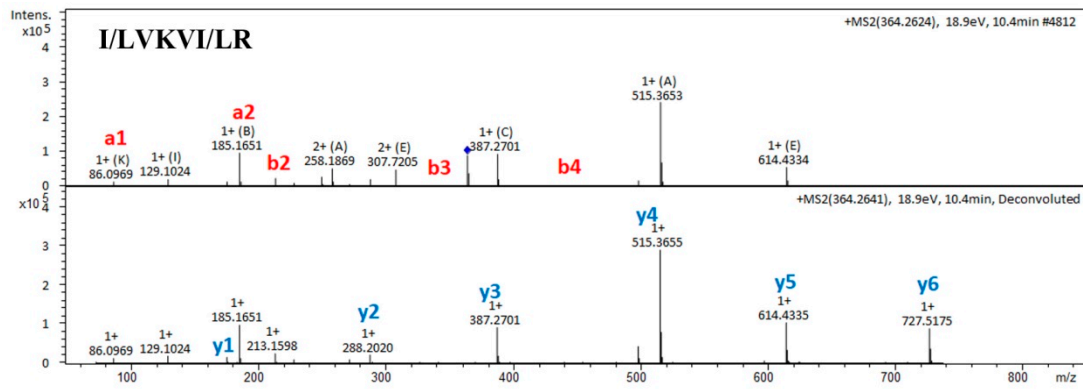

Supplementary Figure 23. Mass spectra and de novo sequencing analysis of  
I/LVKVI/LR

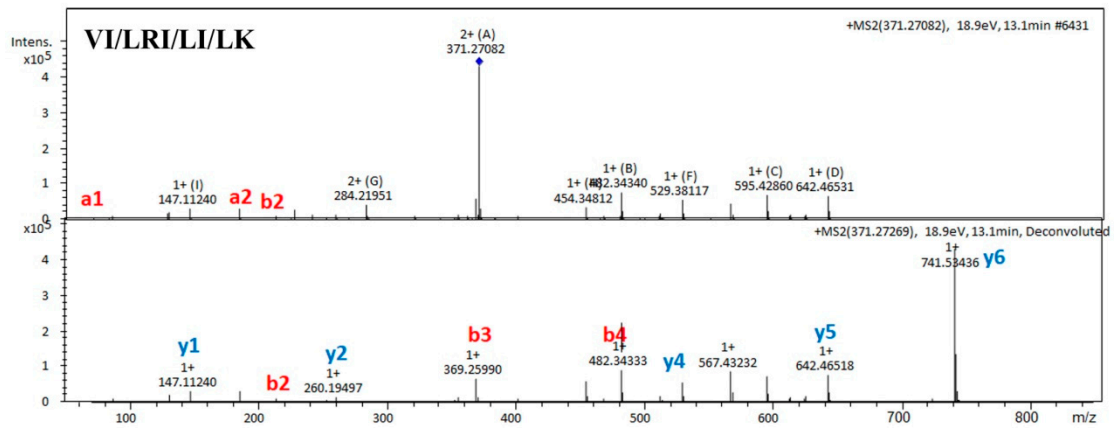

Supplementary Figure 24. Mass spectra and de novo sequencing analysis of  
VI/LRI/LI/LK

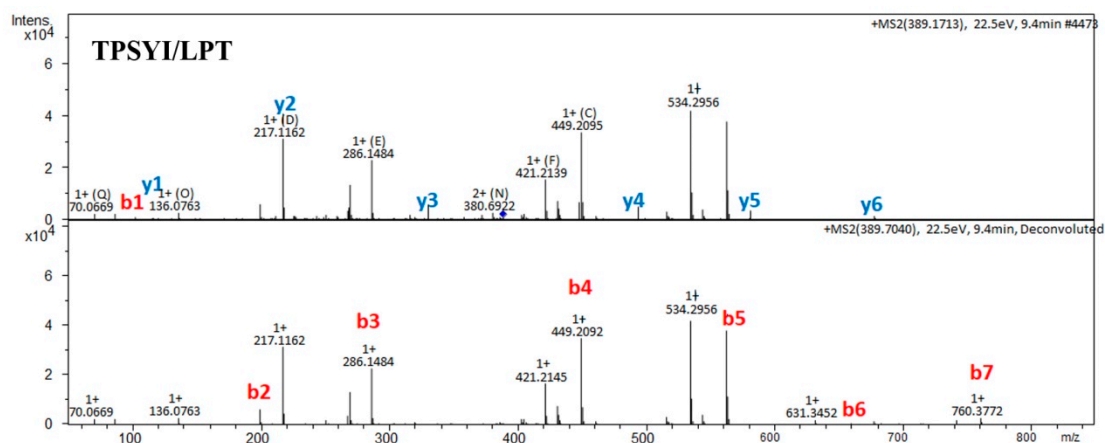

Supplementary Figure 25. Mass spectra and de novo sequencing analysis of  
TPSYI/LPT

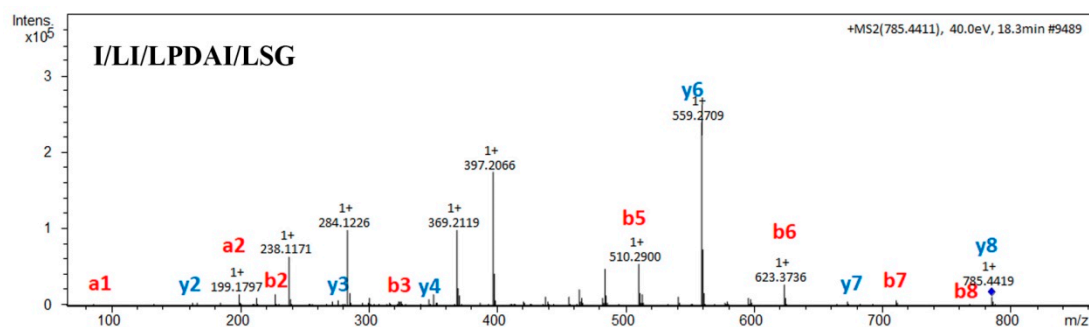

Supplementary Figure 26. Mass spectra and de novo sequencing analysis of  
I/LI/LPDAI/LSG

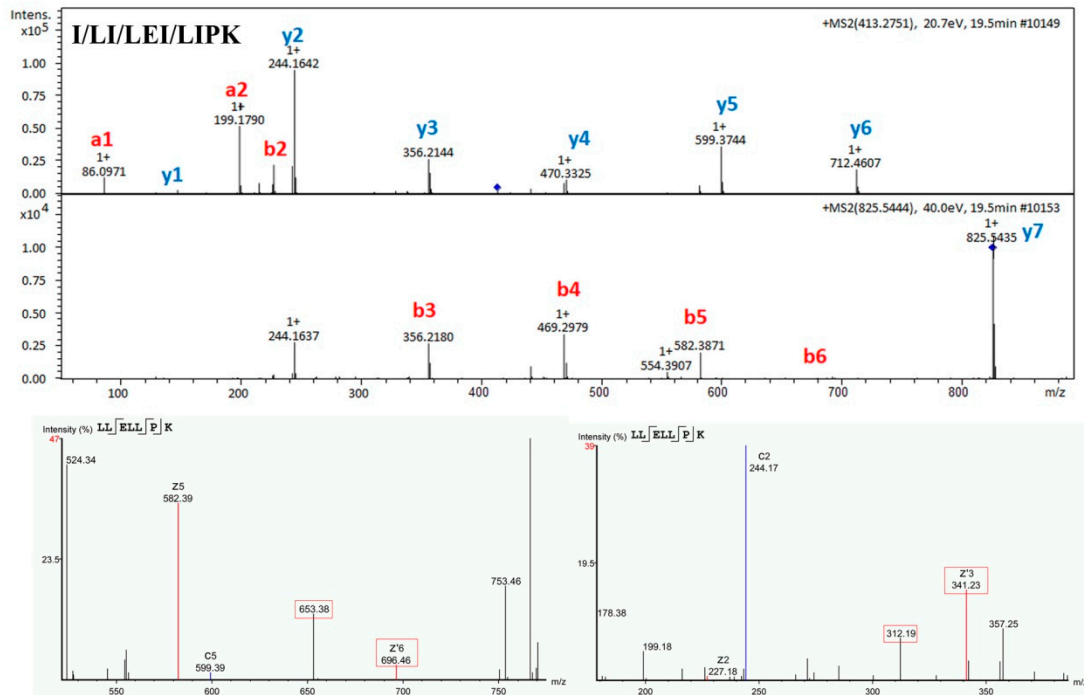

Supplementary Figure 27. Mass spectra and de novo sequencing analysis of  
I/LI/LEI/LIPK

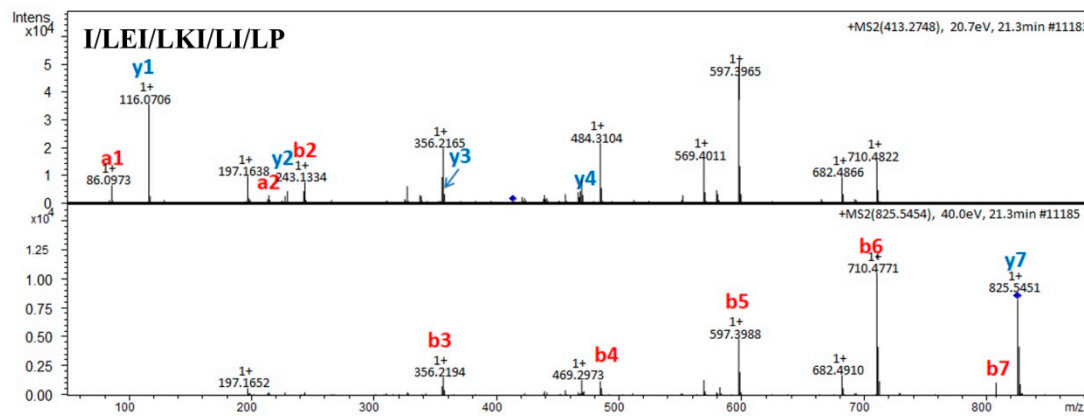

Supplementary Figure 28. Mass spectra and de novo sequencing analysis of  
I/LEI/LKI/LI/LP

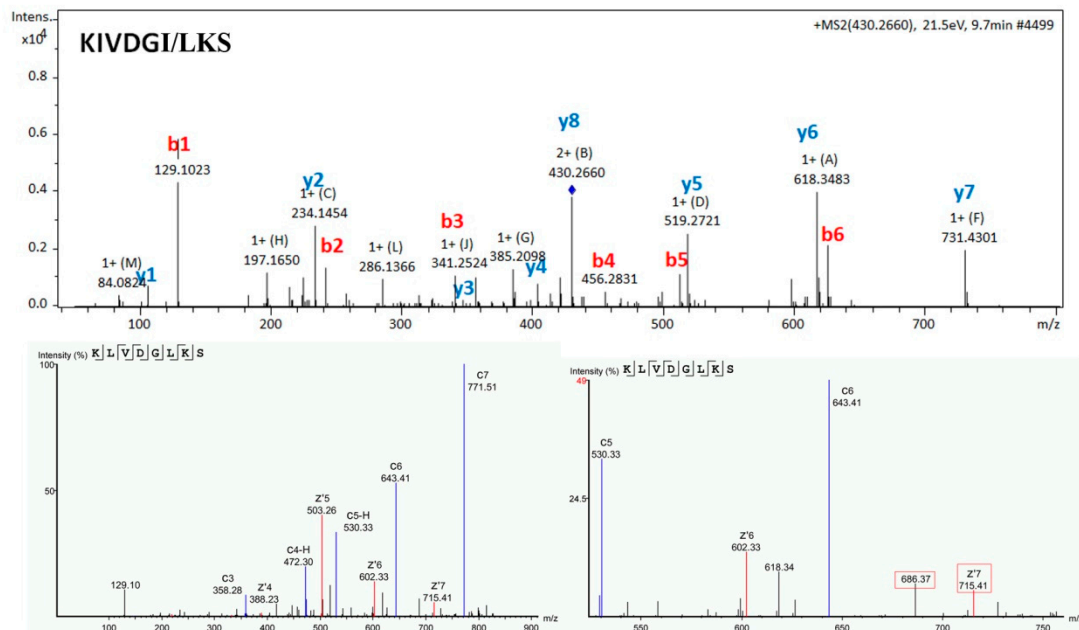

Supplementary Figure 29. Mass spectra and de novo sequencing analysis of  
KIVDGI/LKS

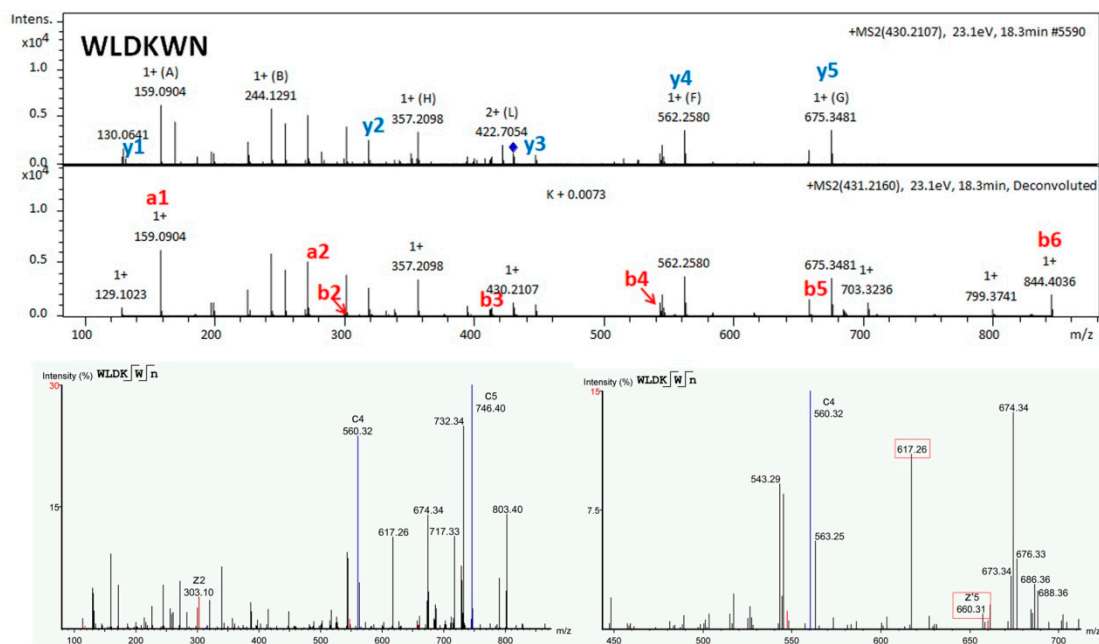

Supplementary Figure 30. Mass spectra and de novo sequencing analysis of  
WLDKWN

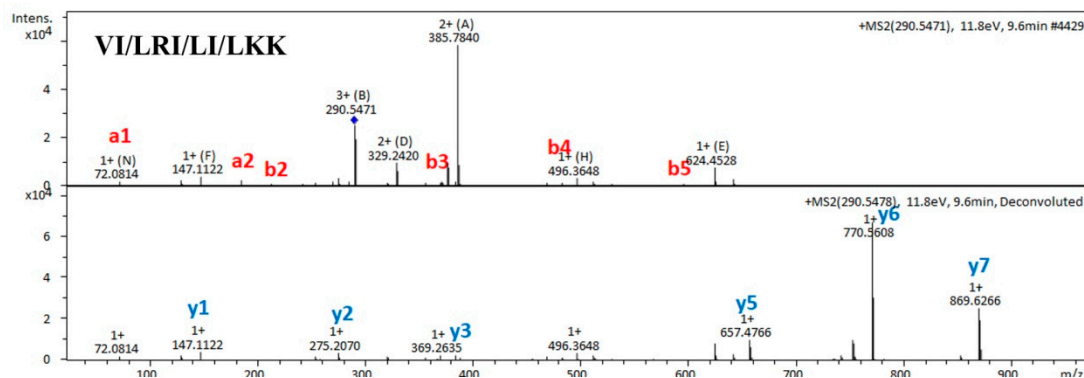

Supplementary Figure 31. Mass spectra and de novo sequencing analysis of  
VI/LRI/LI/LKK

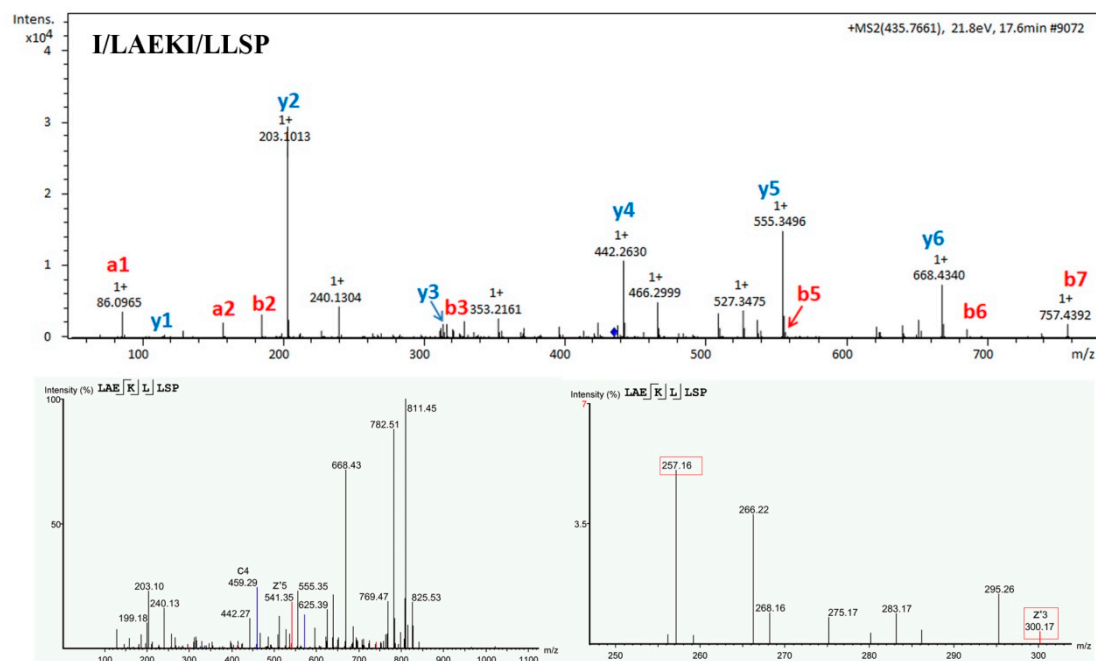

Supplementary Figure 32. Mass spectra and de novo sequencing analysis of  
I/LAEKI/LLSP

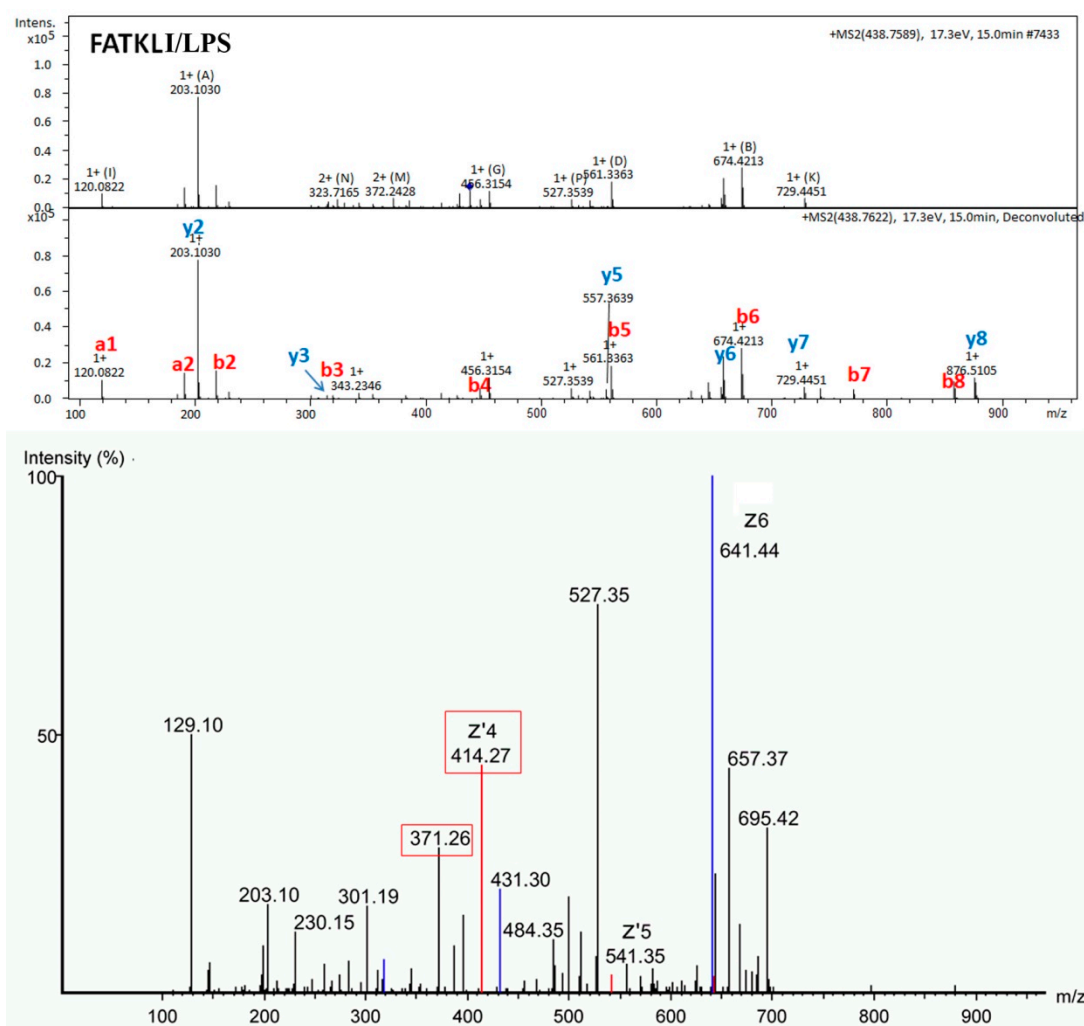

Supplementary Figure 33. Mass spectra and de novo sequencing analysis of  
FATKLI/LPS

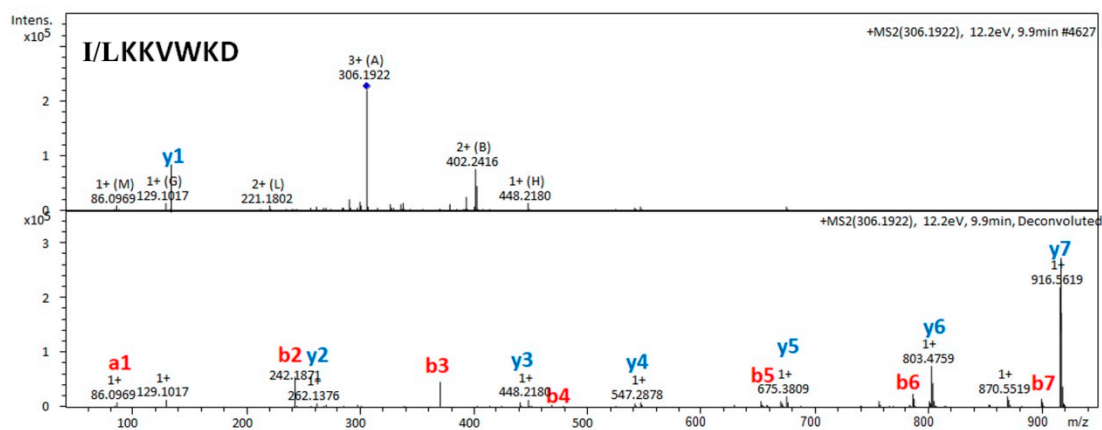

Supplementary Figure 34. Mass spectra and de novo sequencing analysis of



# I/LKKVWKD

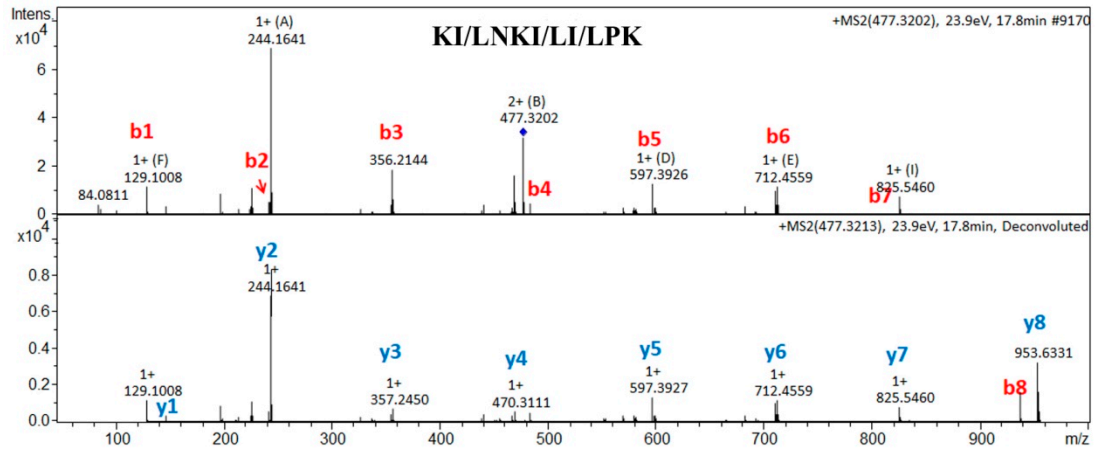

Supplementary Figure 35. Mass spectra and de novo sequencing analysis of

# KI/LNKI/LI/LPK

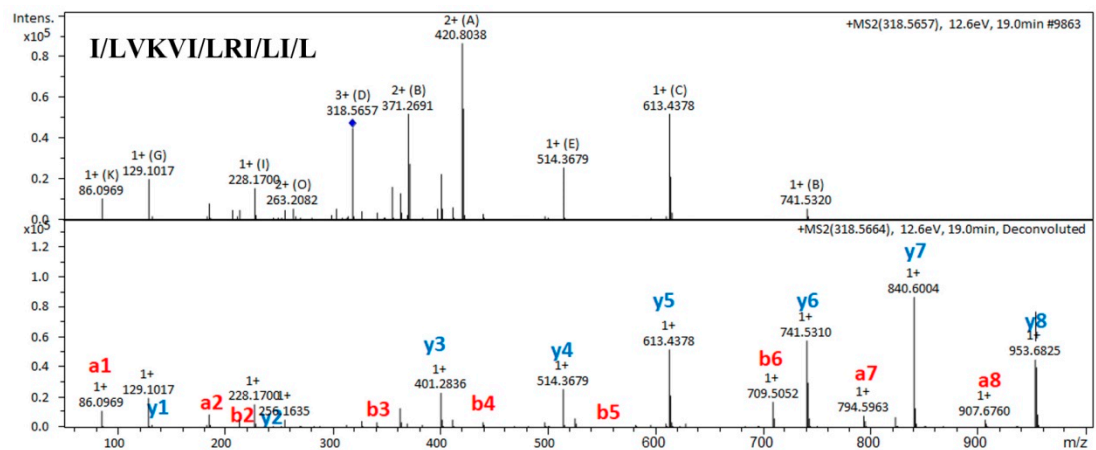

Supplementary Figure 36. Mass spectra and de novo sequencing analysis of

# I/LVKVI/LRI/LI/L

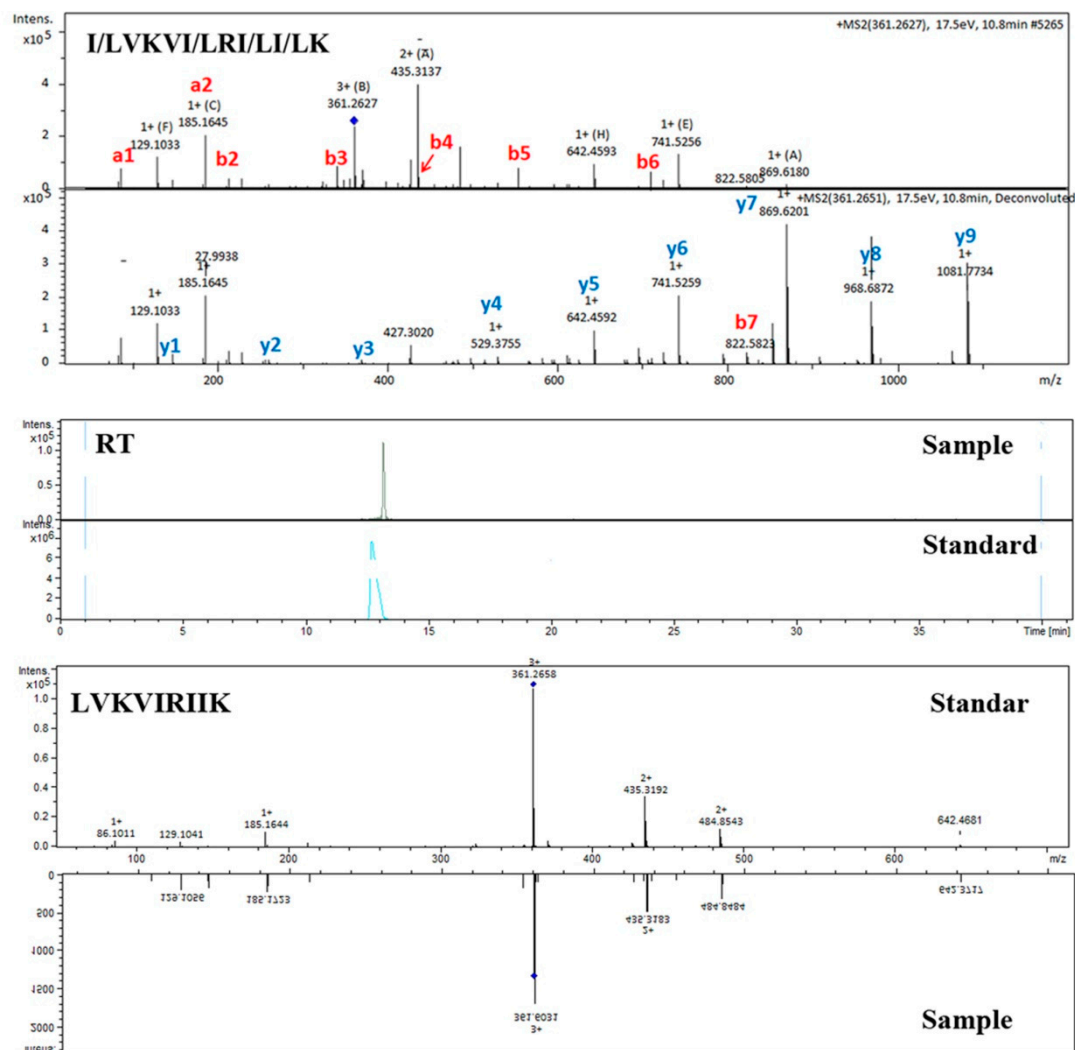

Supplementary Figure 37. Mass spectra and de novo sequencing analysis of

I/LVKVI/LRI/LI/LK

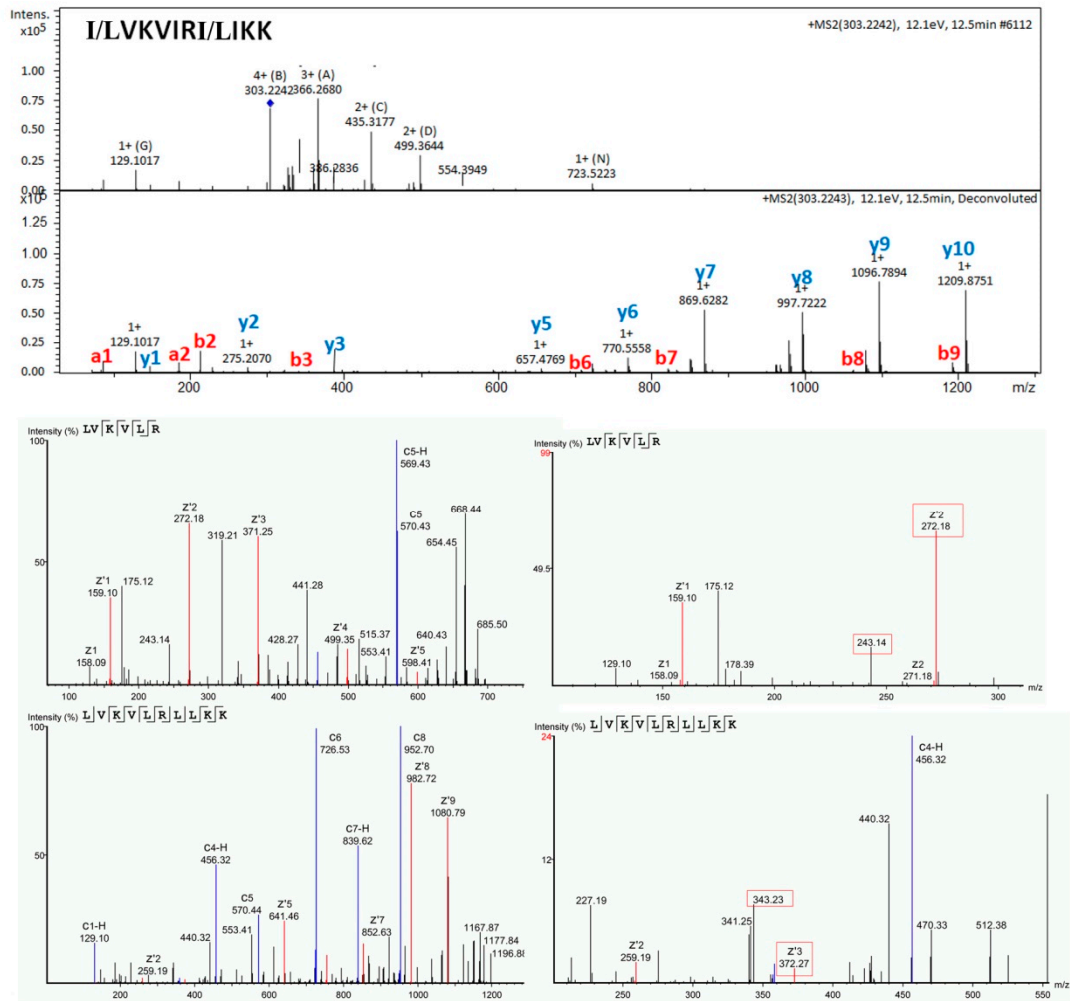

Supplementary Figure 38. Mass spectra and de novo sequencing analysis of

I/LVKVIRI/LIKK

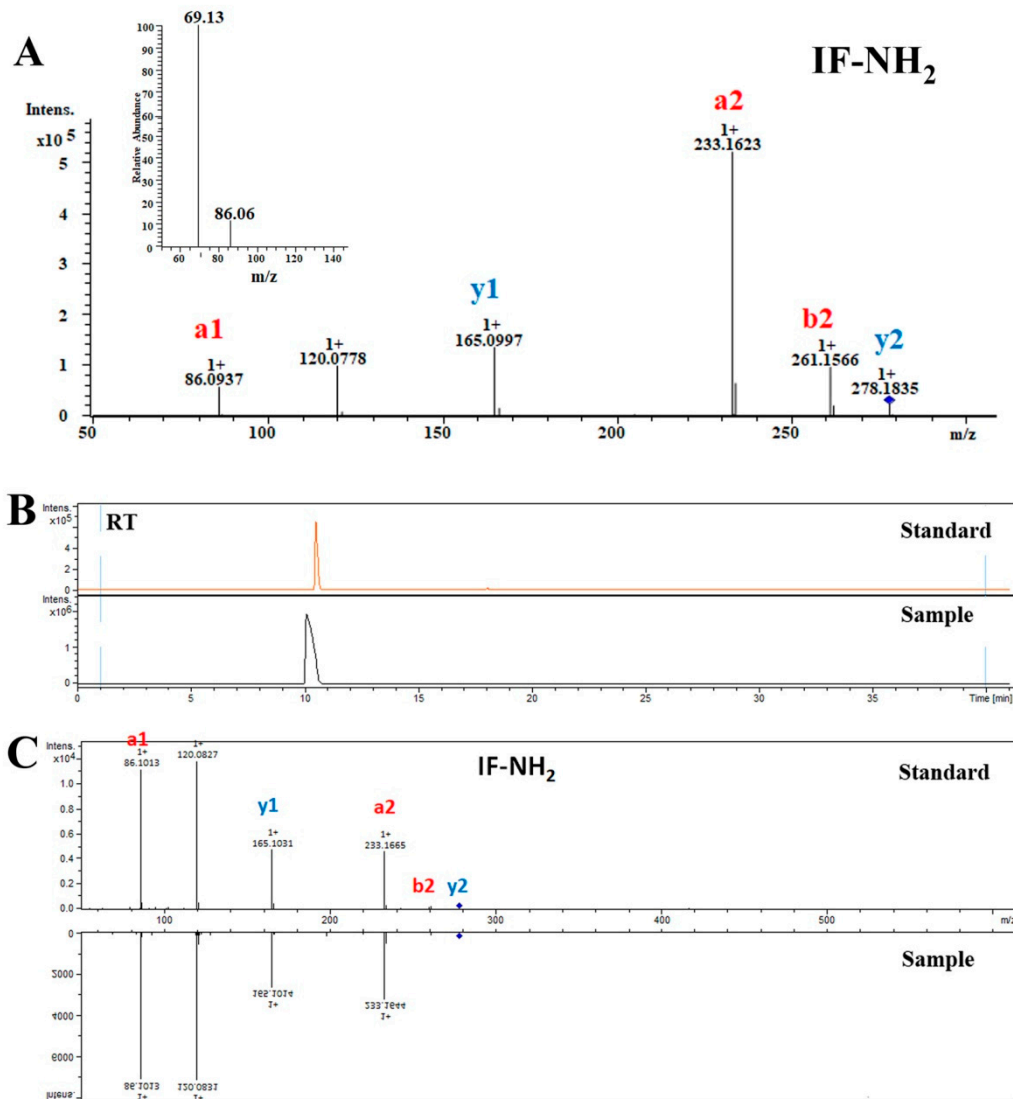

Supplementary Figure 39. Mass spectra and de novo sequencing analysis of IF-NH<sub>2</sub>

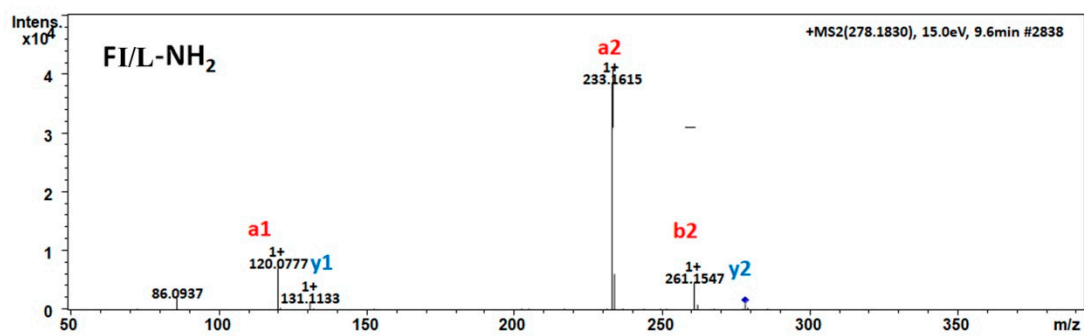

Supplementary Figure 40. Mass spectra and de novo sequencing analysis of FI/L-NH<sub>2</sub>

FI/L-NH<sub>2</sub>

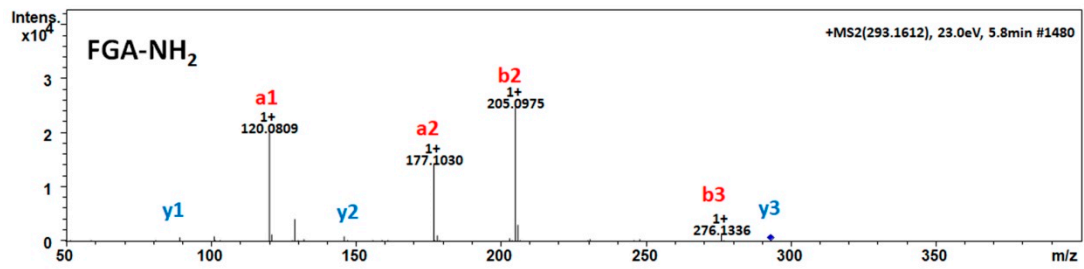

Supplementary Figure 41. Mass spectra and de novo sequencing analysis of

FGA-NH<sub>2</sub>

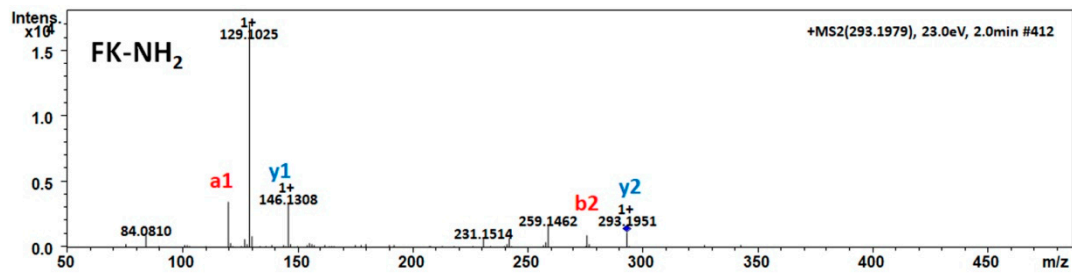

Supplementary Figure 42. Mass spectra and de novo sequencing analysis of

FK-NH<sub>2</sub>

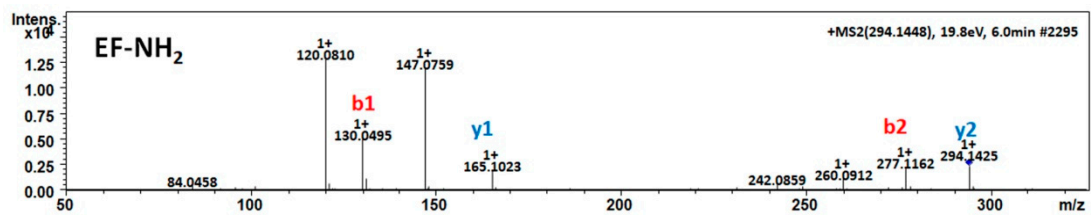

Supplementary Figure 43. Mass spectra and de novo sequencing analysis of

EF-NH<sub>2</sub>

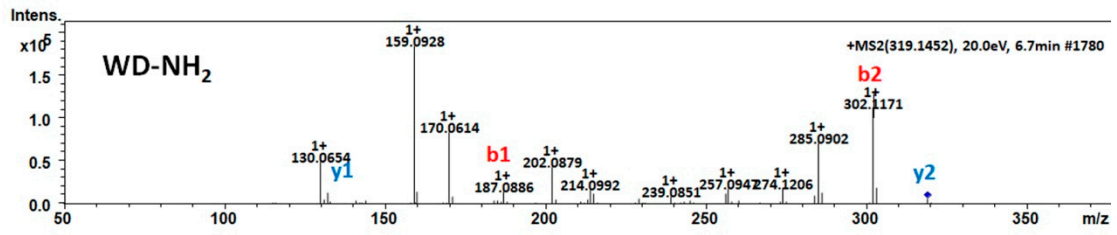

Supplementary Figure 47. Mass spectra and de novo sequencing analysis of  
I/LGAVA-NH<sub>2</sub>

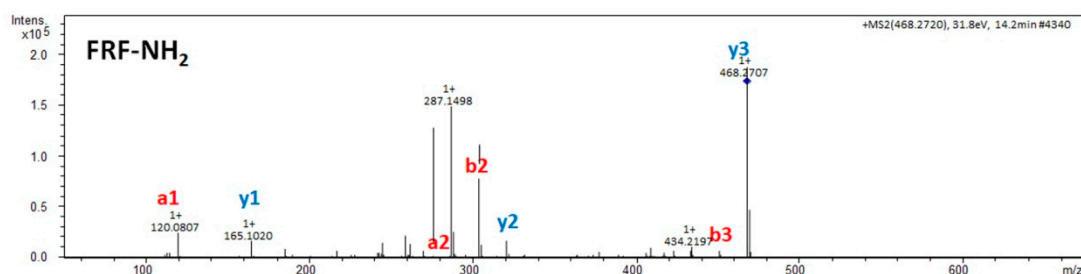

Supplementary Figure 48. Mass spectra and de novo sequencing analysis of  
FRF-NH<sub>2</sub>

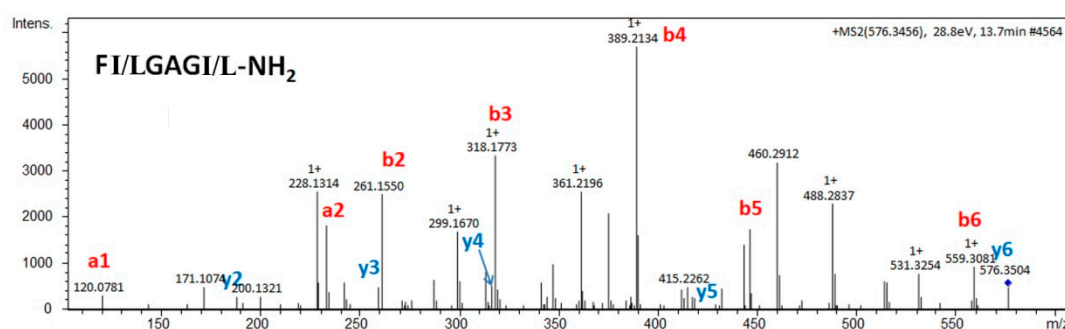

Supplementary Figure 49. Mass spectra and de novo sequencing analysis of  
FI/LGAGI/L-NH<sub>2</sub>

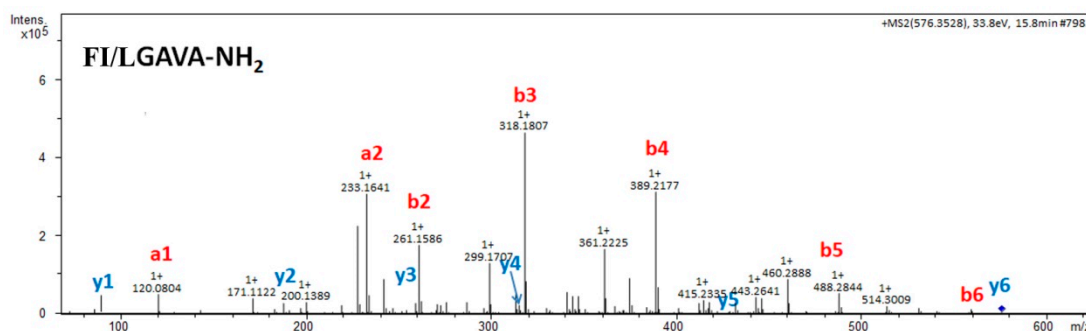

Supplementary Figure 50. Mass spectra and de novo sequencing analysis of  
FI/LGAVA-NH<sub>2</sub>

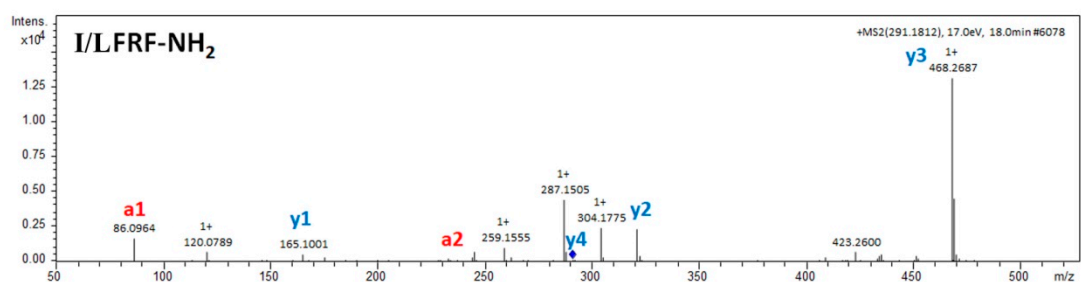

Supplementary Figure 51. Mass spectra and de novo sequencing analysis of

I/LFRF-NH<sub>2</sub>

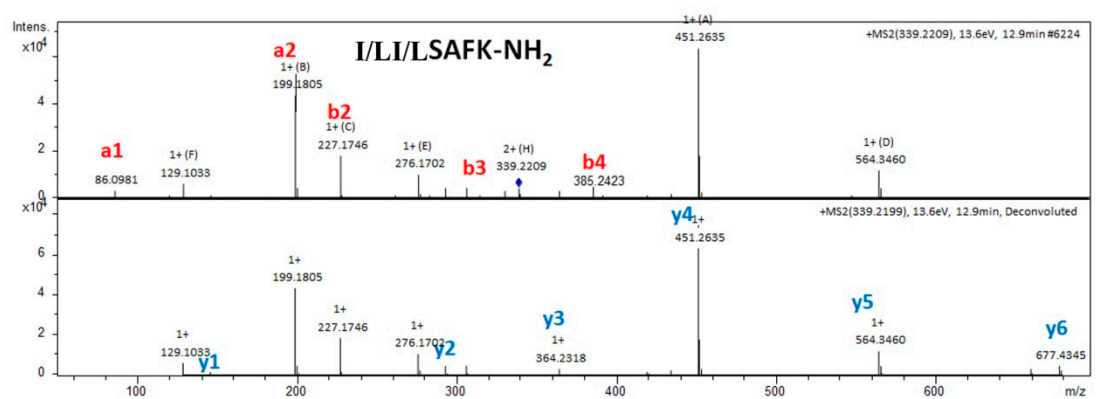

Supplementary Figure 52. Mass spectra and de novo sequencing analysis of

I/LI/LSAFK-NH<sub>2</sub>

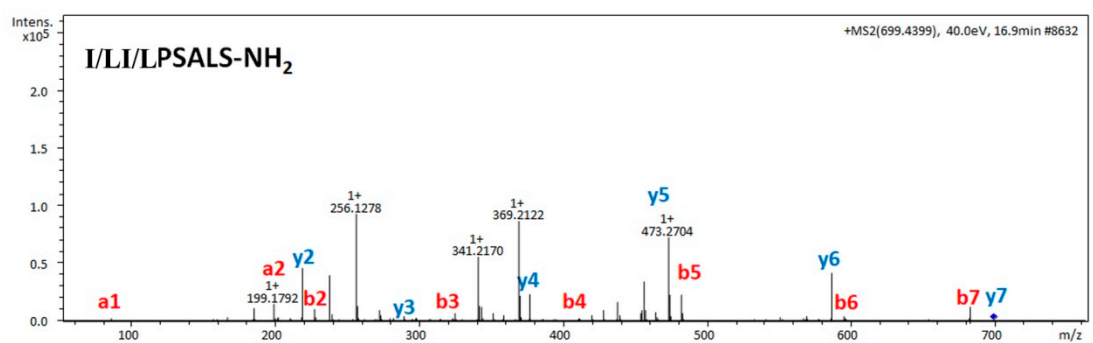

Supplementary Figure 53. Mass spectra and de novo sequencing analysis of

I/LI/LPSAI/LS-NH<sub>2</sub>



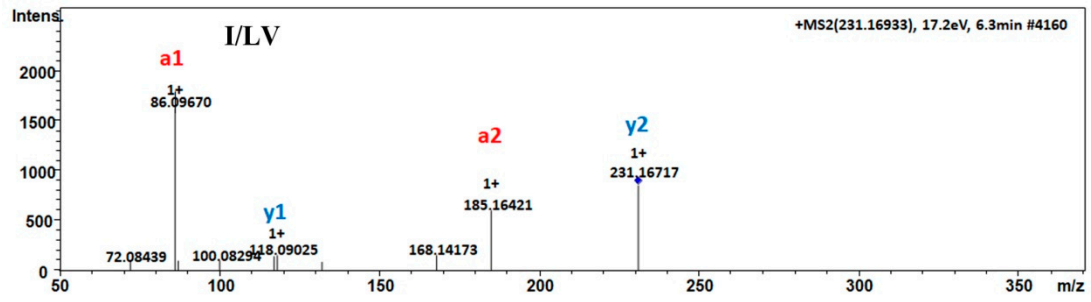

Supplementary Figure 54. Mass spectra and de novo sequencing analysis of

I/LV

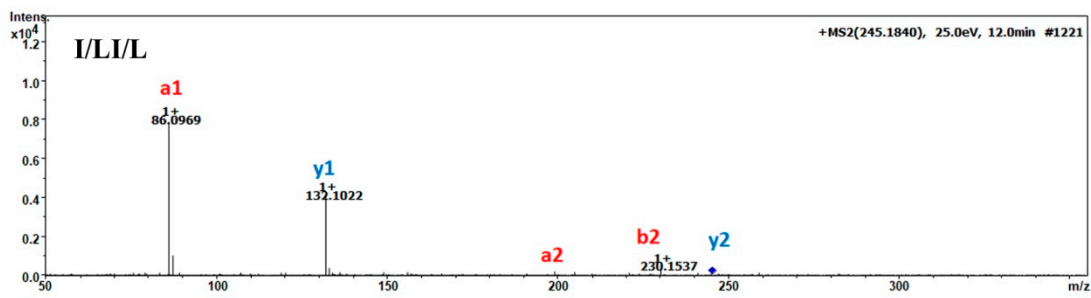

Supplementary Figure 55. Mass spectra and de novo sequencing analysis of

I/LI/L

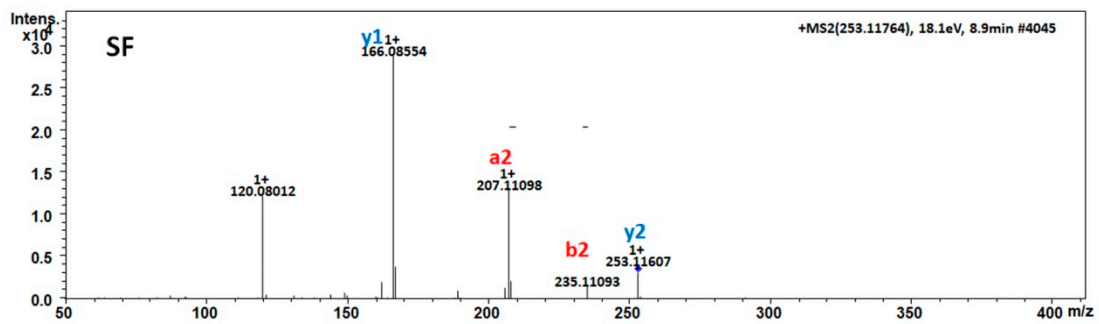

Supplementary Figure 56. Mass spectra and de novo sequencing analysis of

SF

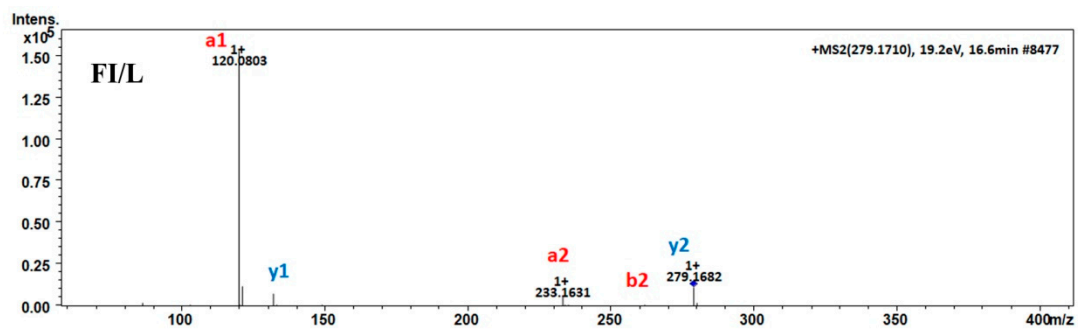

Supplementary Figure 57. Mass spectra and de novo sequencing analysis of  
FI/L

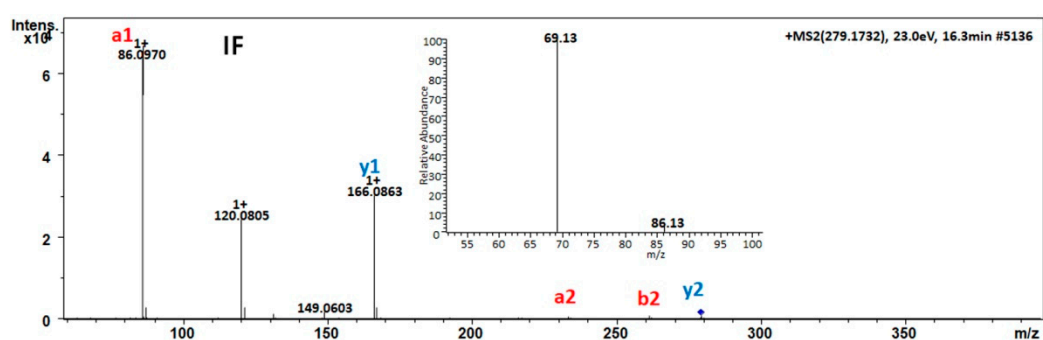

Supplementary Figure 58. Mass spectra and de novo sequencing analysis of IF

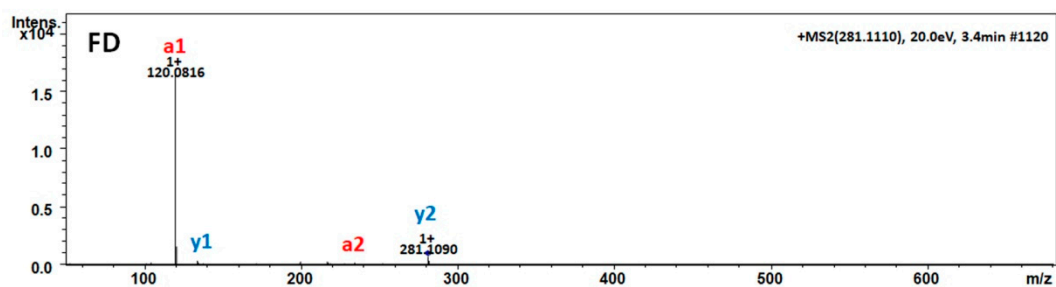

Supplementary Figure 59. Mass spectra and de novo sequencing analysis of  
FD

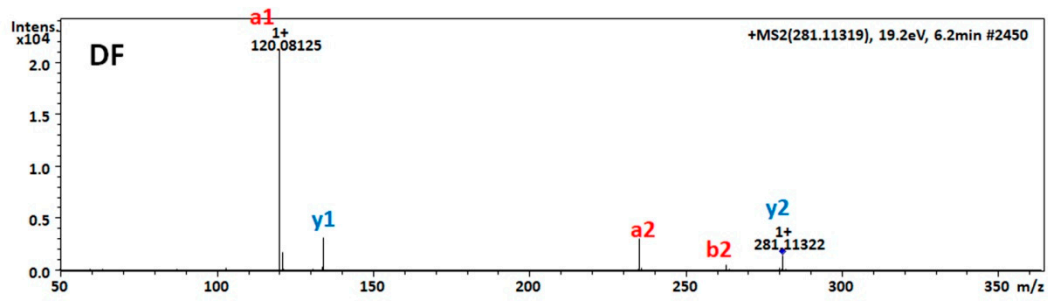

Supplementary Figure 60. Mass spectra and de novo sequencing analysis of

DF

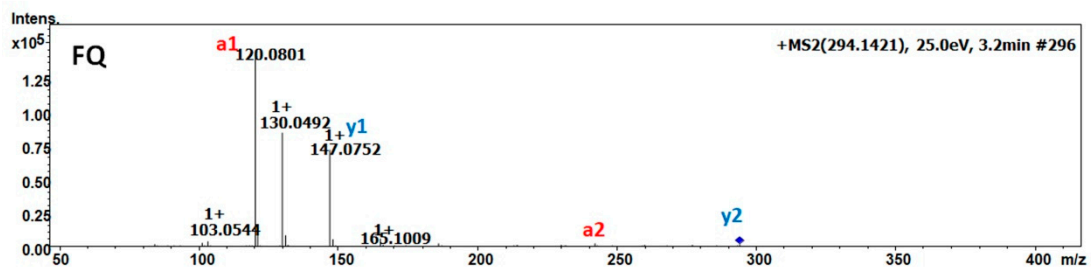

Supplementary Figure 61. Mass spectra and de novo sequencing analysis of

FQ

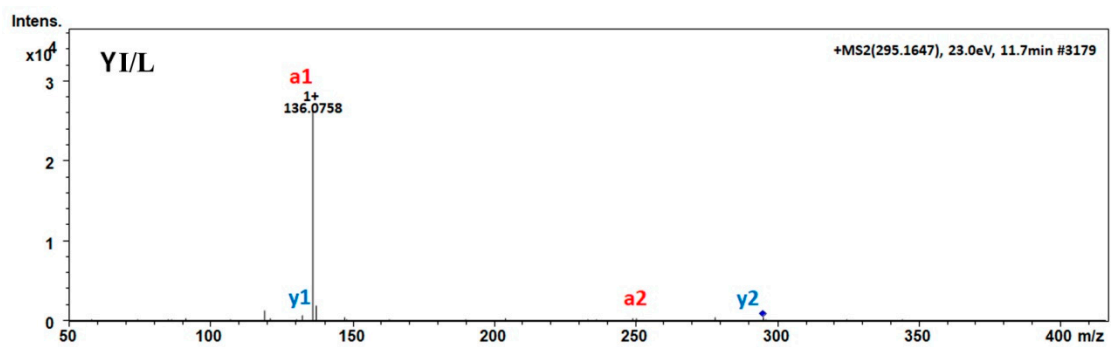

Supplementary Figure 62. Mass spectra and de novo sequencing analysis of

YI/L

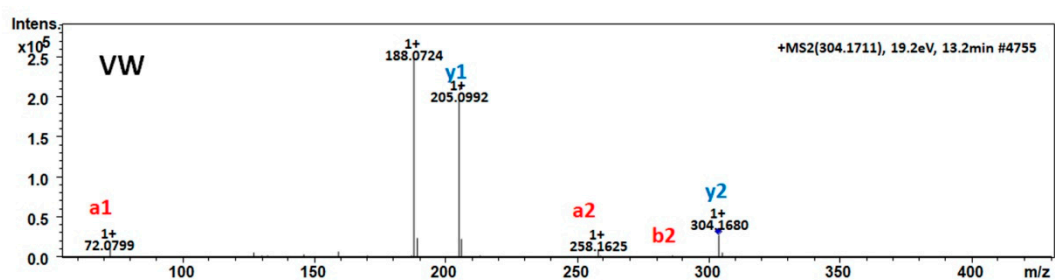

Supplementary Figure 63. Mass spectra and de novo sequencing analysis of  
VW

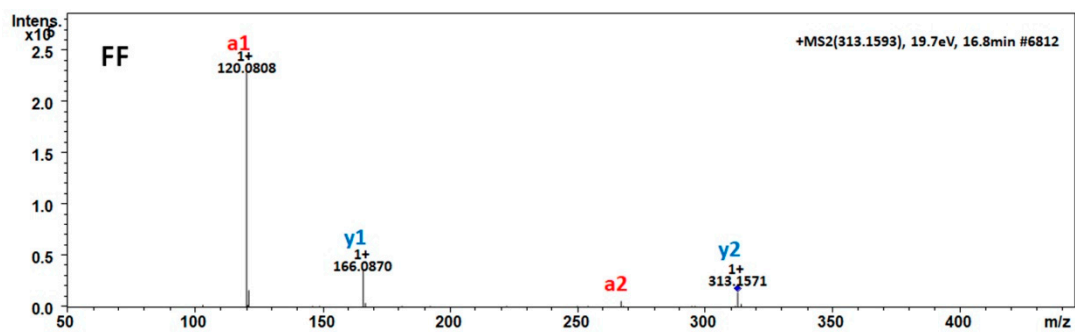

Supplementary Figure 64. Mass spectra and de novo sequencing analysis of  
FF

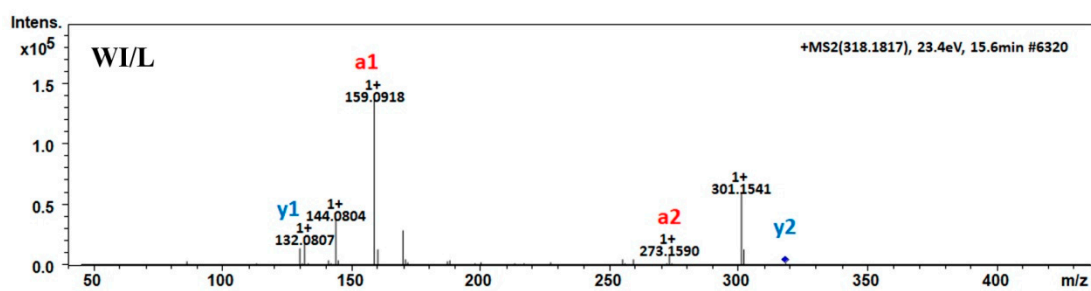

Supplementary Figure 65. Mass spectra and de novo sequencing analysis of  
WI/L

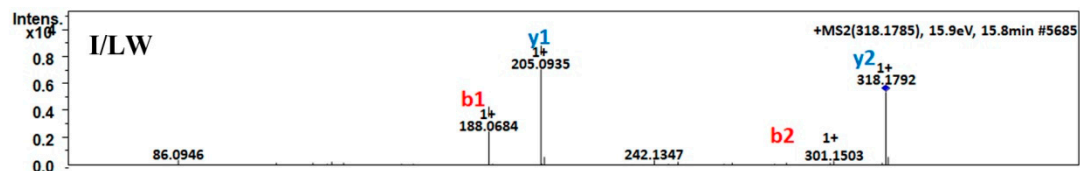

Supplementary Figure 66. Mass spectra and de novo sequencing analysis of I/LW

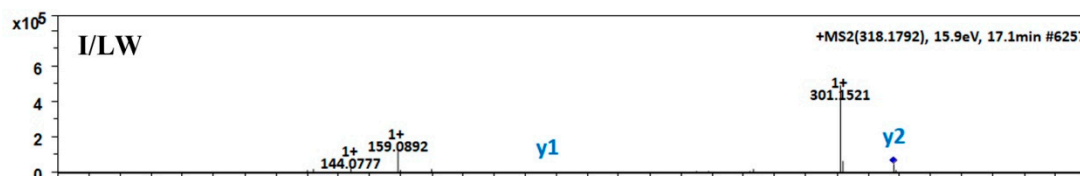

Supplementary Figure 67. Mass spectra and de novo sequencing analysis of I/LW

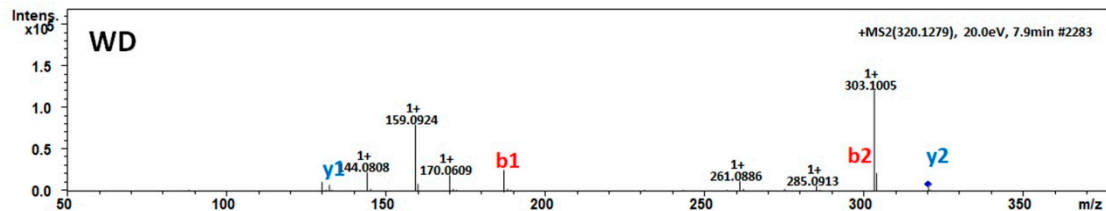

Supplementary Figure 68. Mass spectra and de novo sequencing analysis of WD

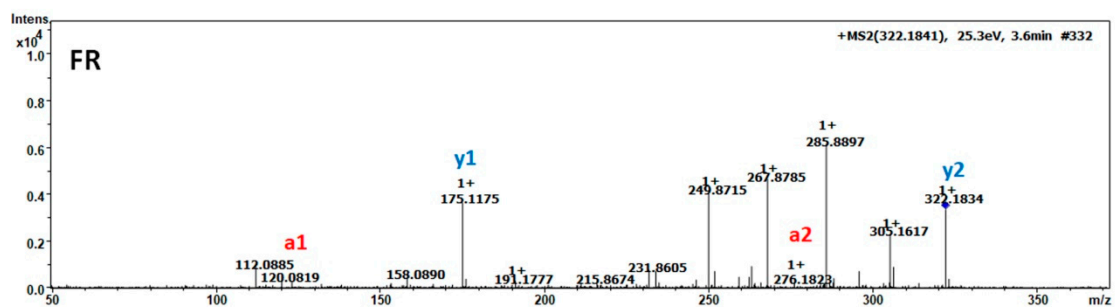

Supplementary Figure 69. Mass spectra and de novo sequencing analysis of FR

FR

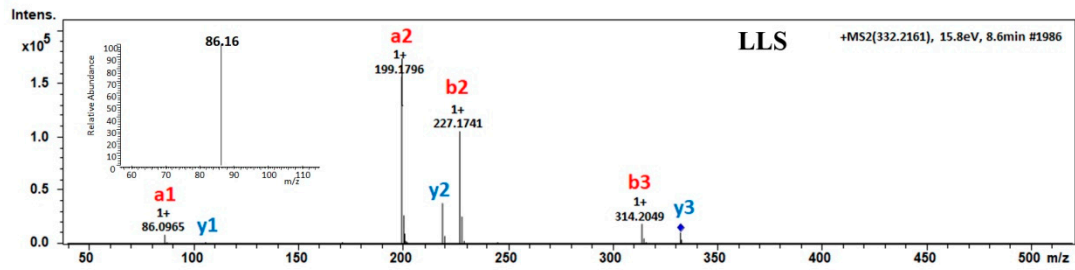

Supplementary Figure 70. Mass spectra and de novo sequencing analysis of

LLS

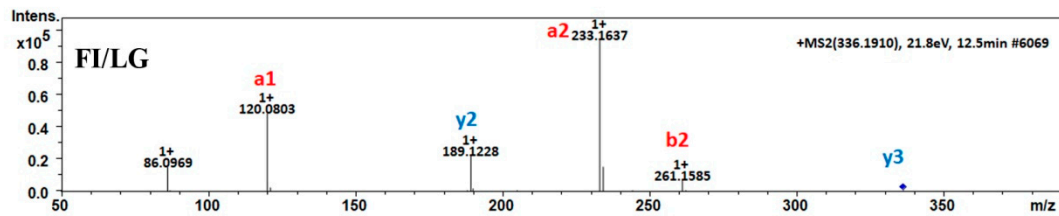

Supplementary Figure 71. Mass spectra and de novo sequencing analysis of

FI/LG

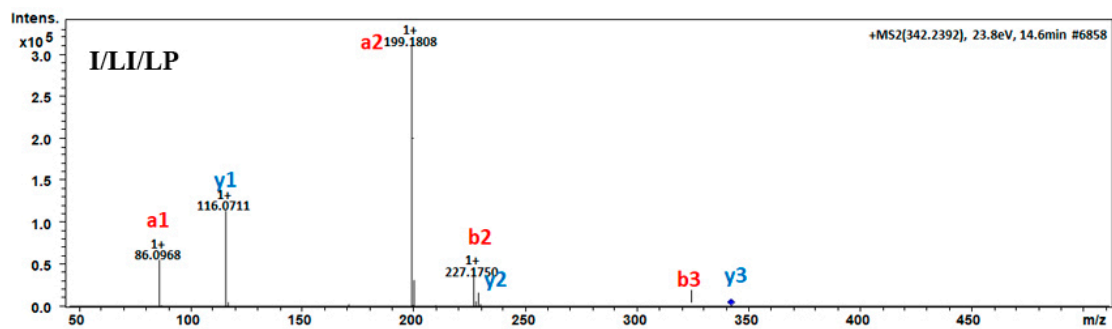

Supplementary Figure 72. Mass spectra and de novo sequencing analysis of

I/LI/LP

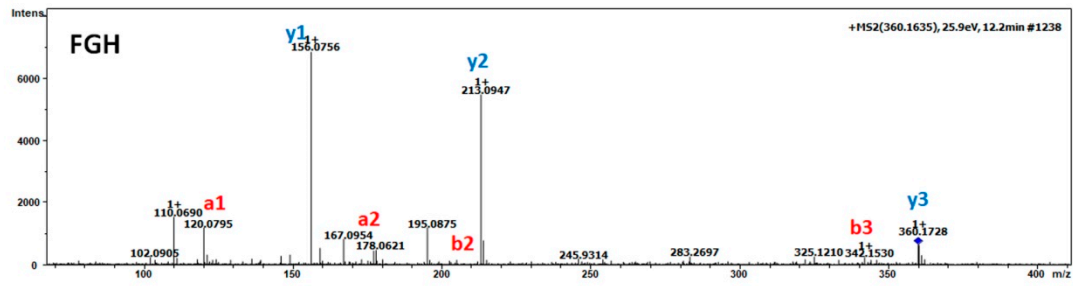

Supplementary Figure73. Mass spectra and de novo sequencing analysis of  
FGH

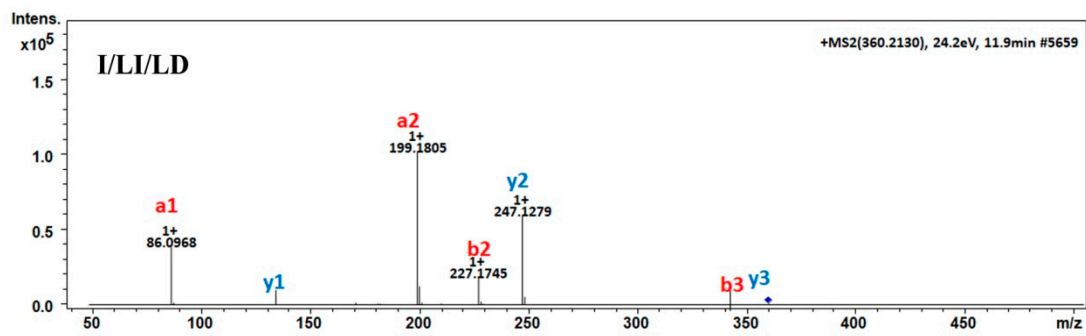

Supplementary Figure74. Mass spectra and de novo sequencing analysis of  
I/LI/LD

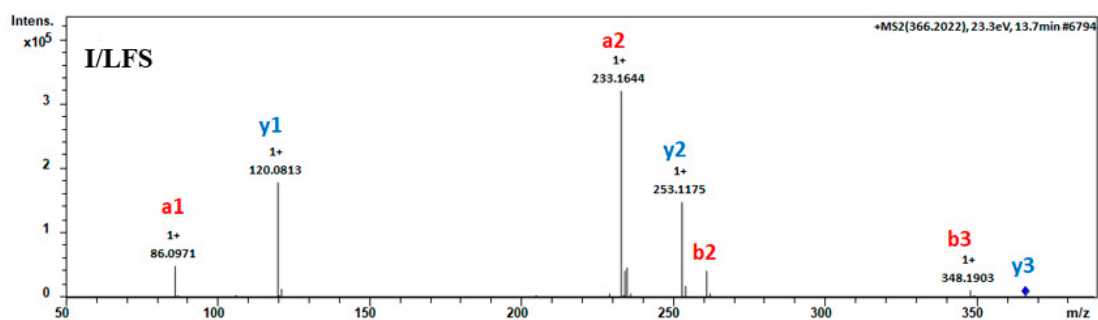

Supplementary Figure75. Mass spectra and de novo sequencing analysis of  
I/LFS

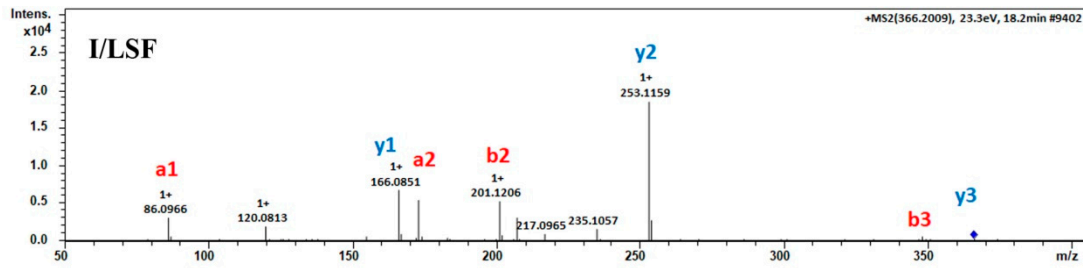

Supplementary Figure76. Mass spectra and de novo sequencing analysis of  
I/LSF

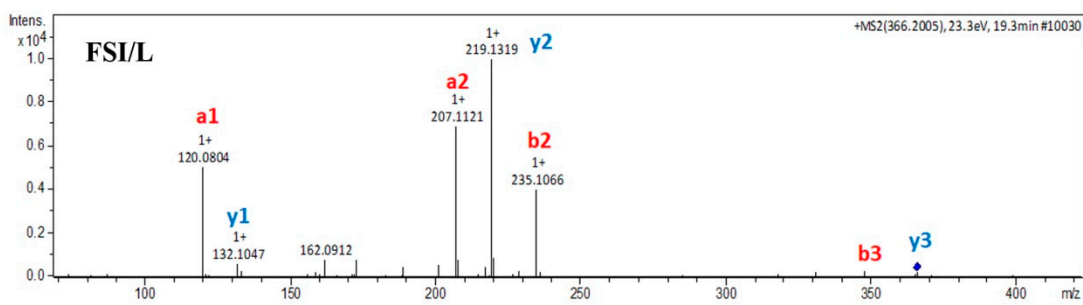

Supplementary Figure77. Mass spectra and de novo sequencing analysis of  
FSI/L

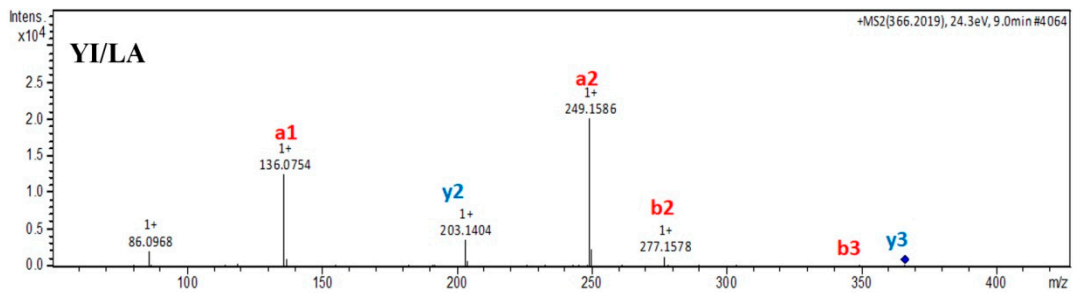

Supplementary Figure78. Mass spectra and de novo sequencing analysis of  
YI/LA



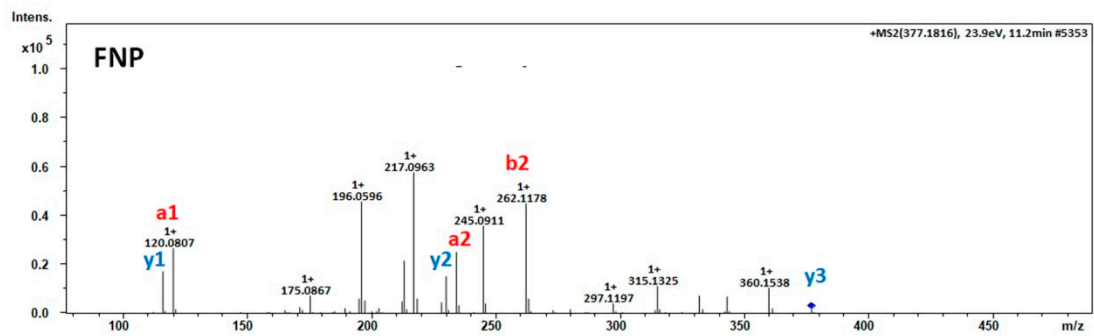

Supplementary Figure 79. Mass spectra and de novo sequencing analysis of FNP

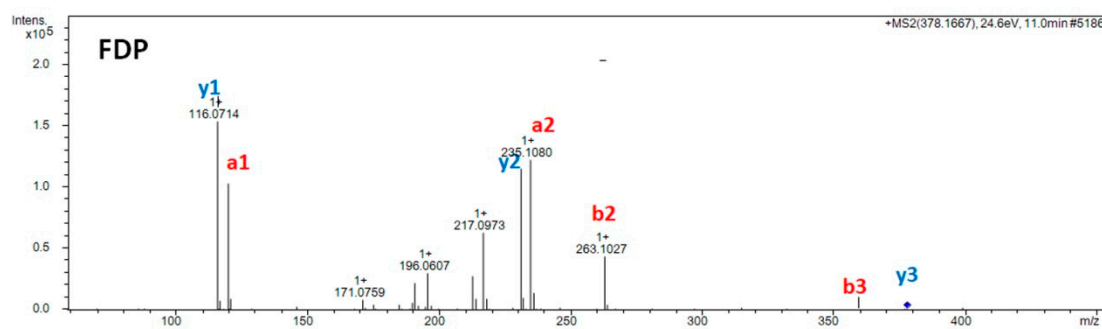

Supplementary Figure 80. Mass spectra and de novo sequencing analysis of FDP

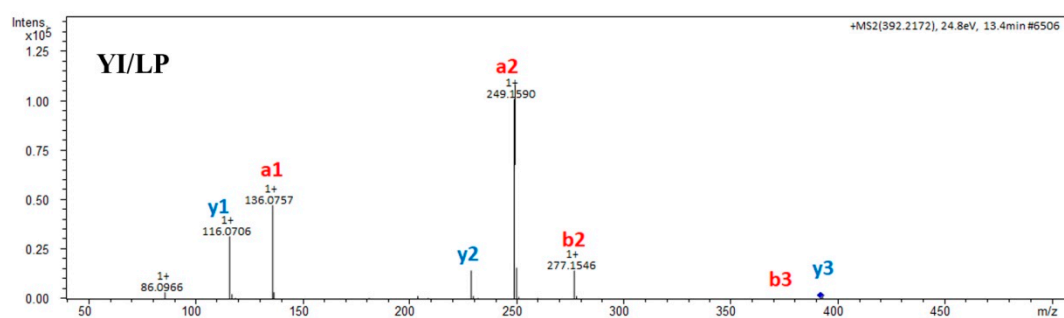

Supplementary Figure 81. Mass spectra and de novo sequencing analysis of YI/LP

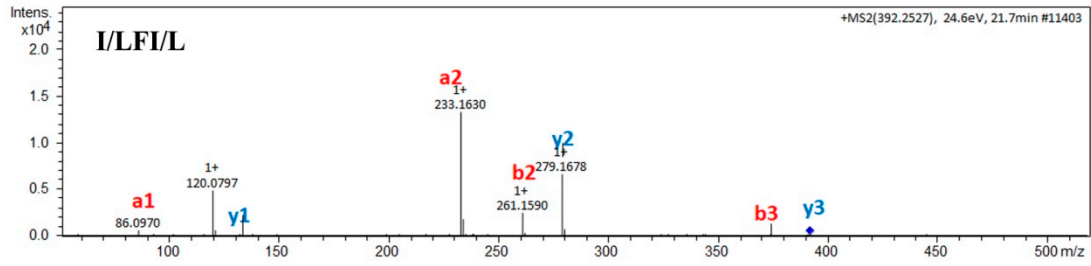

Supplementary Figure 82. Mass spectra and de novo sequencing analysis of  
I/LFI/L

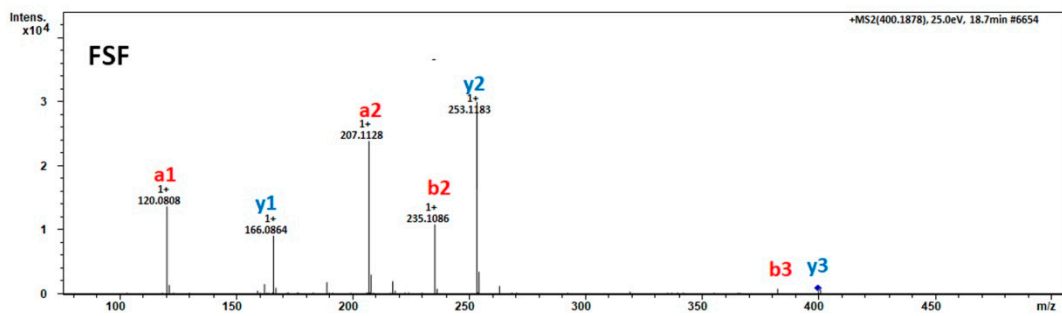

Supplementary Figure 83. Mass spectra and de novo sequencing analysis of  
FSF

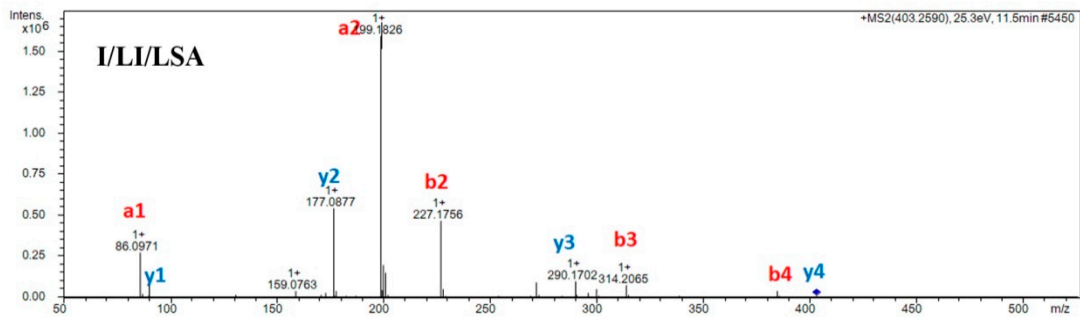

Supplementary Figure 84. Mass spectra and de novo sequencing analysis of  
I/LI/LSA

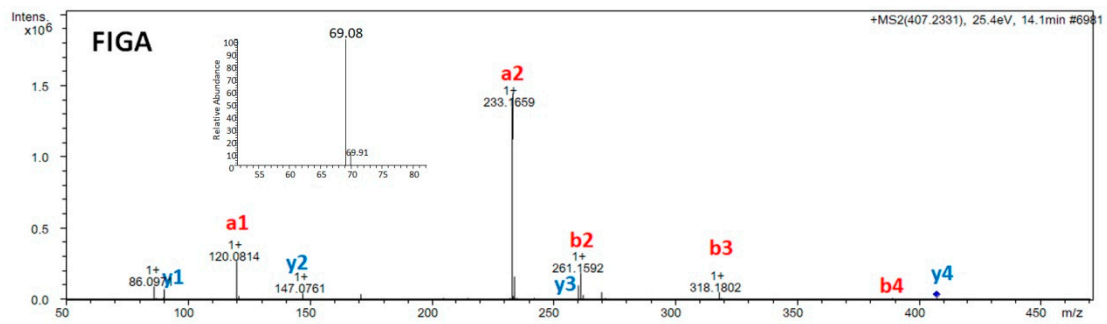

Supplementary Figure 85. Mass spectra and de novo sequencing analysis of  
FIGA

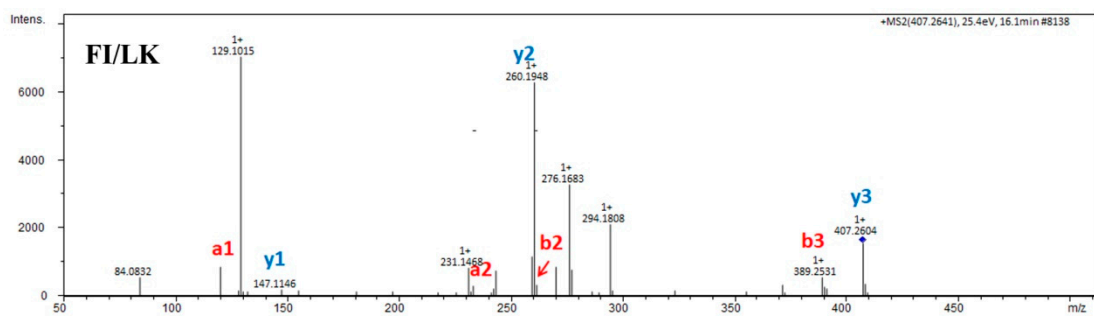

Supplementary Figure73. Mass spectra and de novo sequencing analysis of  
FI/LK

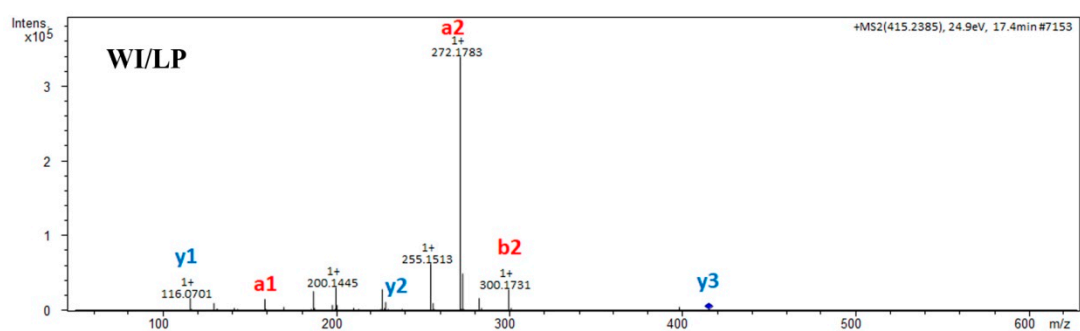

Supplementary Figure 87. Mass spectra and de novo sequencing analysis of  
WI/LP

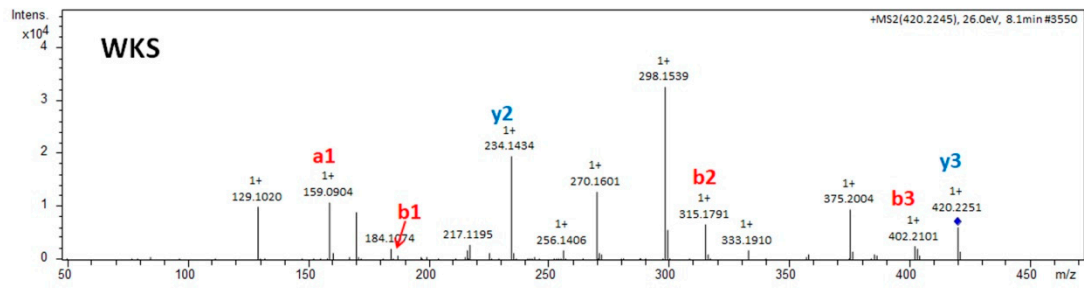

Supplementary Figure 88. Mass spectra and de novo sequencing analysis of  
WKS

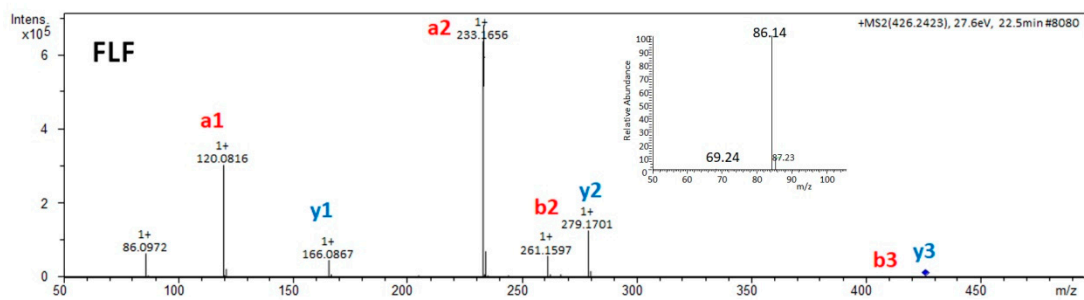

Supplementary Figure 89. Mass spectra and de novo sequencing analysis of  
FLF

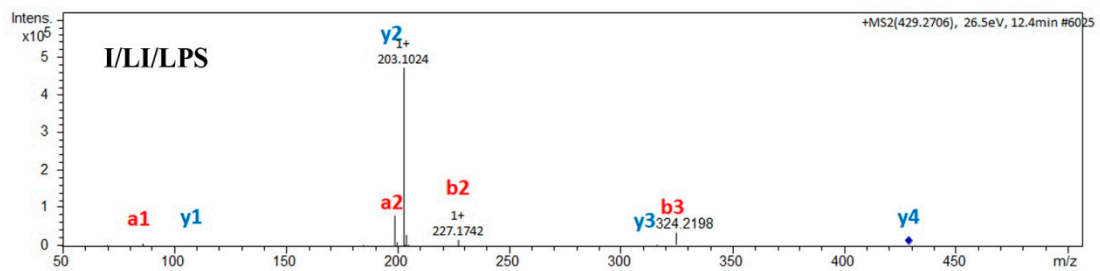

Supplementary Figure 90. Mass spectra and de novo sequencing analysis of  
I/LI/LPS

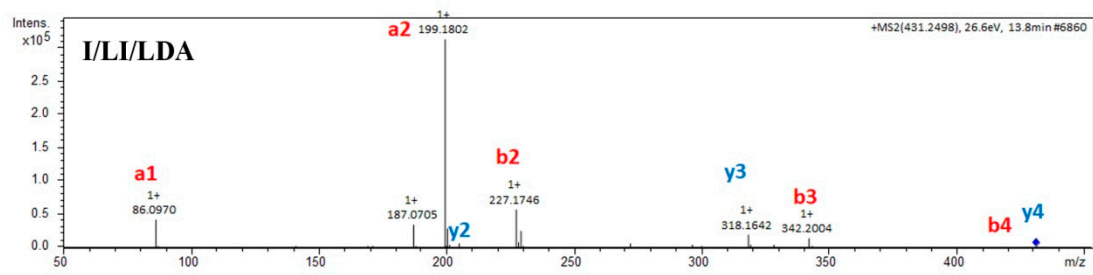

Supplementary Figure 91. Mass spectra and de novo sequencing analysis of  
I/LI/LDA

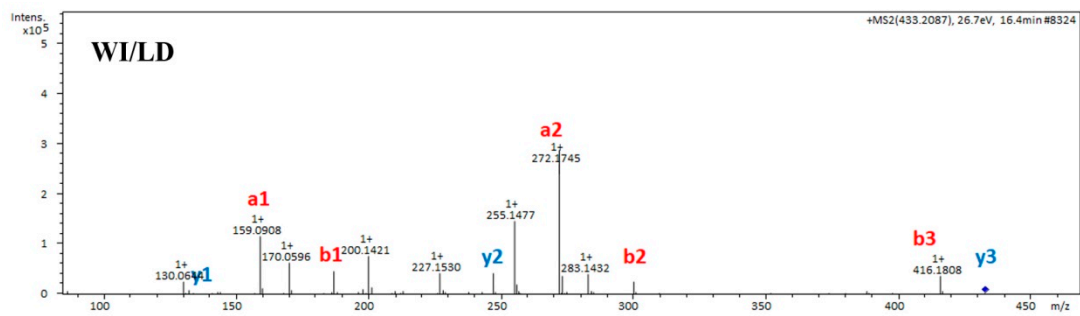

Supplementary Figure 92. Mass spectra and de novo sequencing analysis of  
WI/LD

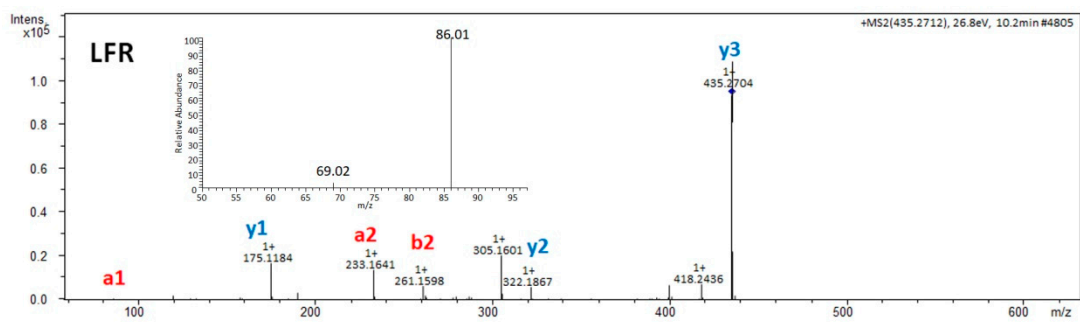

Supplementary Figure 93. Mass spectra and de novo sequencing analysis of  
LFR

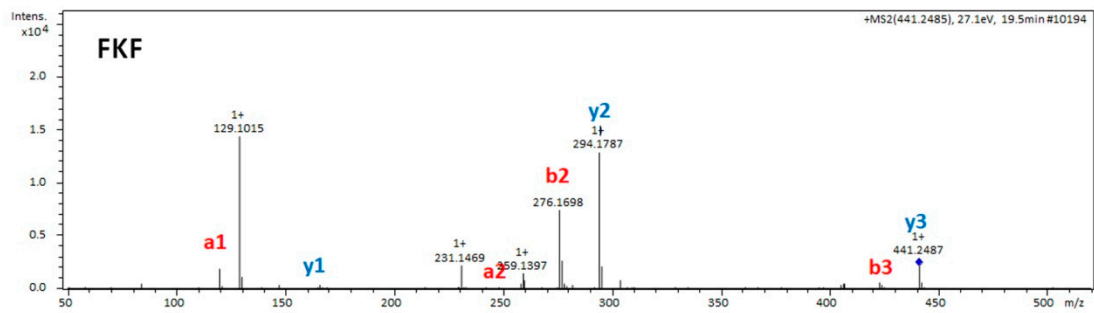

Supplementary Figure 94. Mass spectra and de novo sequencing analysis of  
FKF

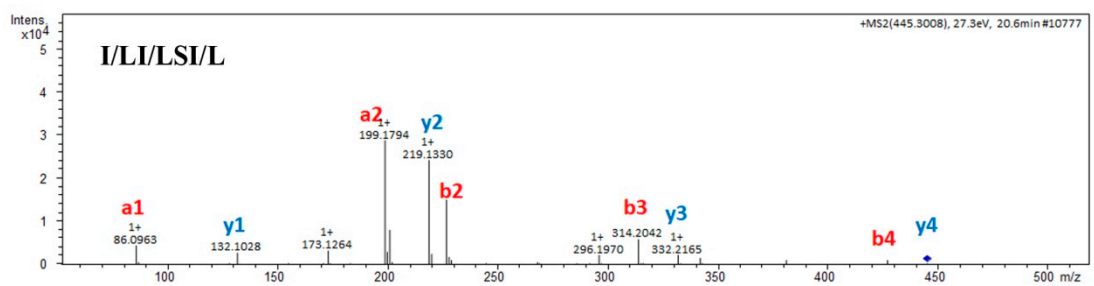

Supplementary Figure 95. Mass spectra and de novo sequencing analysis of  
I/LI/LSI/L

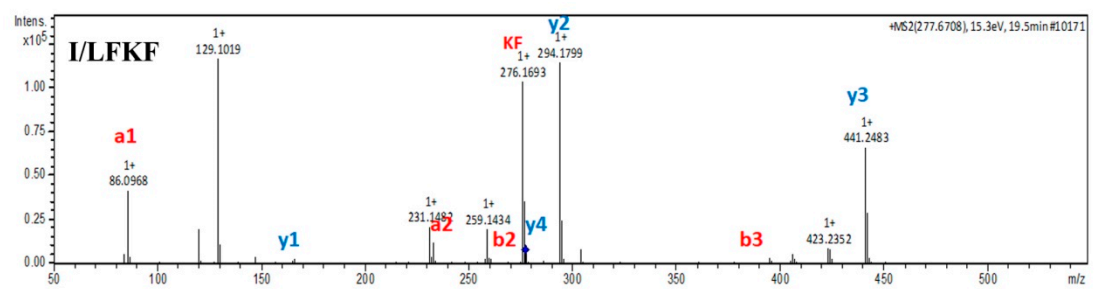

Supplementary Figure 96. Mass spectra and de novo sequencing analysis of  
I/LFKF

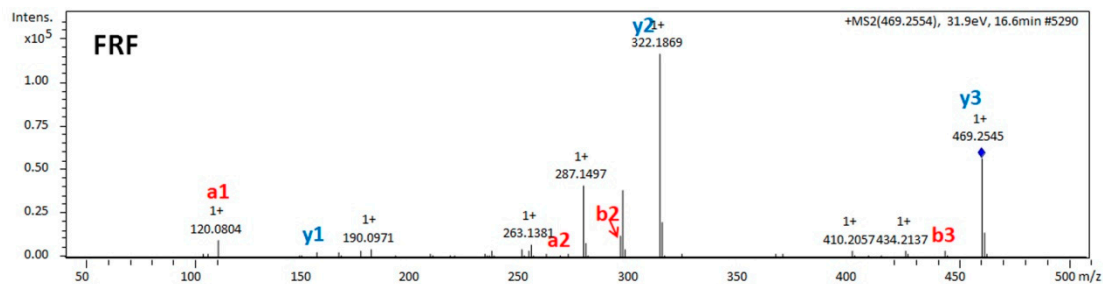

Supplementary Figure 97. Mass spectra and de novo sequencing analysis of  
FRF

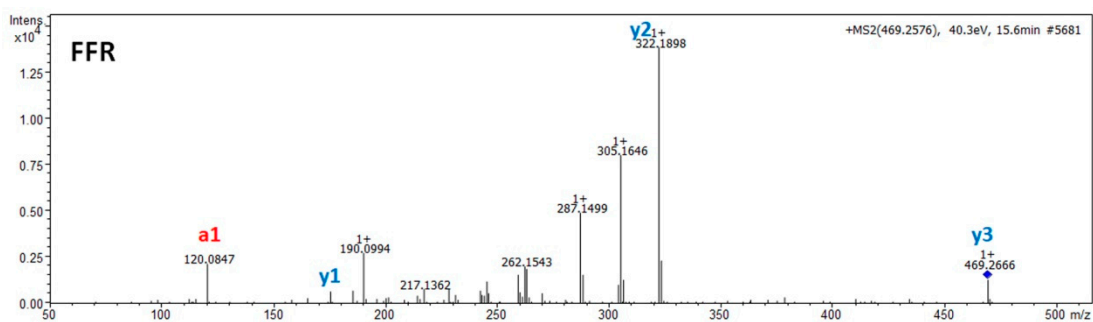

Supplementary Figure 98. Mass spectra and de novo sequencing analysis of  
FFR

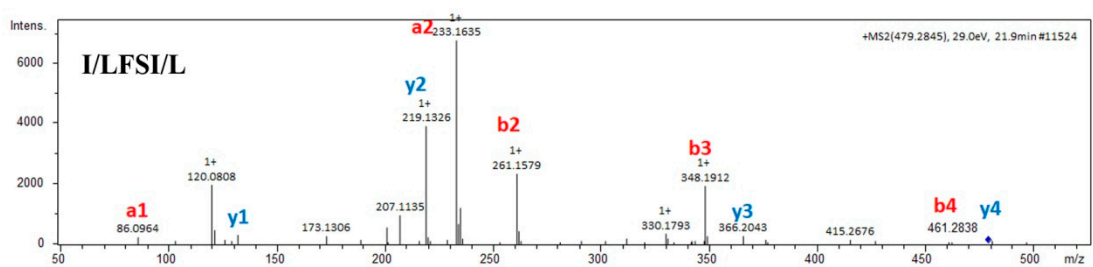

Supplementary Figure 99. Mass spectra and de novo sequencing analysis of  
I/LFSI/L

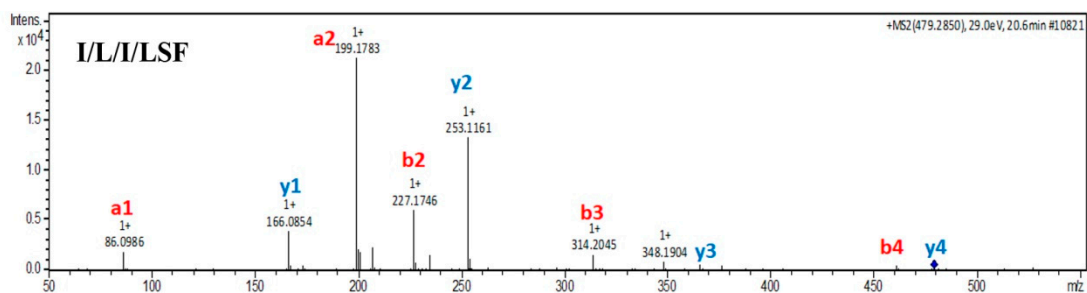

Supplementary Figure 100. Mass spectra and de novo sequencing analysis of I/L/I/LSF

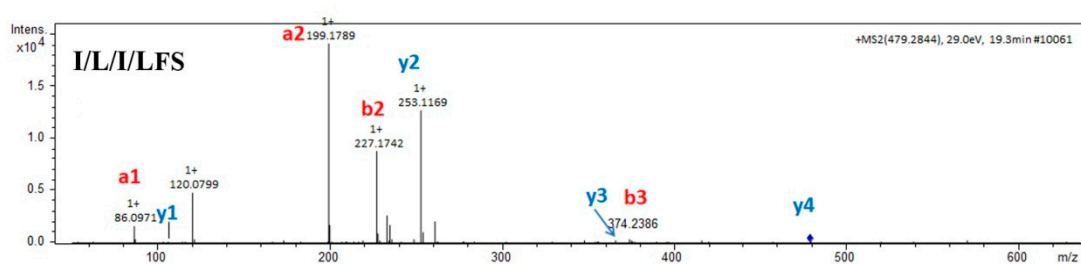

Supplementary Figure 101. Mass spectra and de novo sequencing analysis of I/L/I/LFS

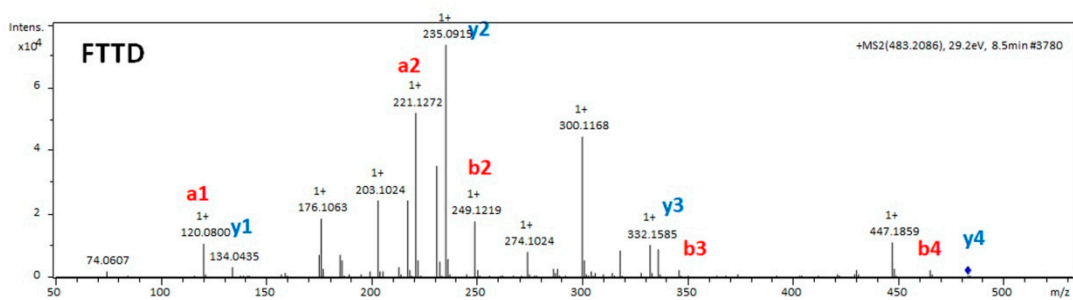

Supplementary Figure 102. Mass spectra and de novo sequencing analysis of FTTD



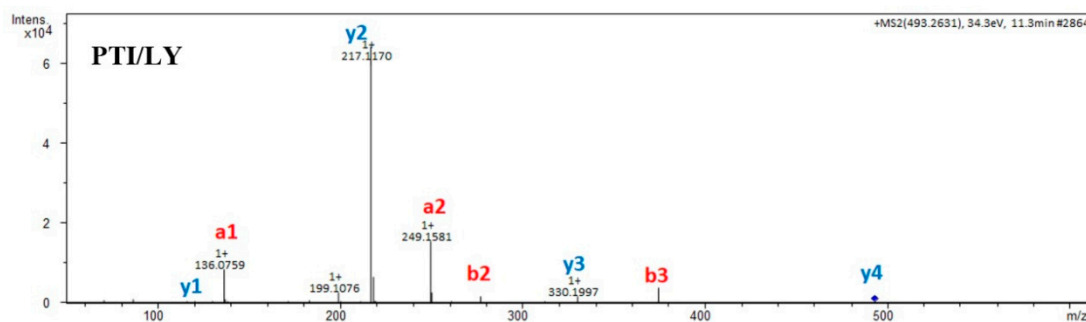

Supplementary Figure 103. Mass spectra and de novo sequencing analysis of PTI/LY

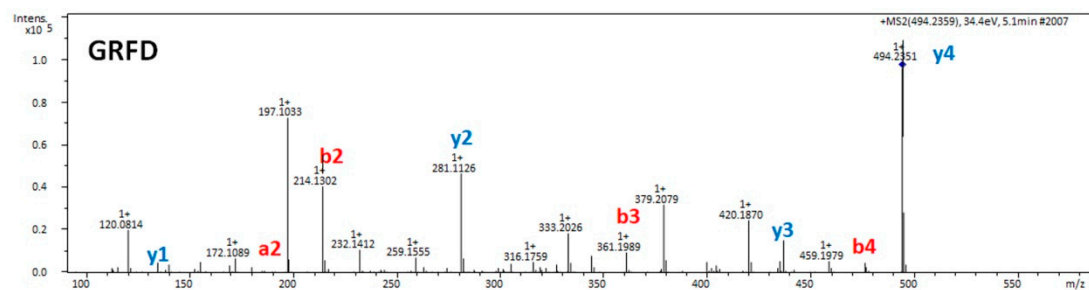

Supplementary Figure 104. Mass spectra and de novo sequencing analysis of GRFD

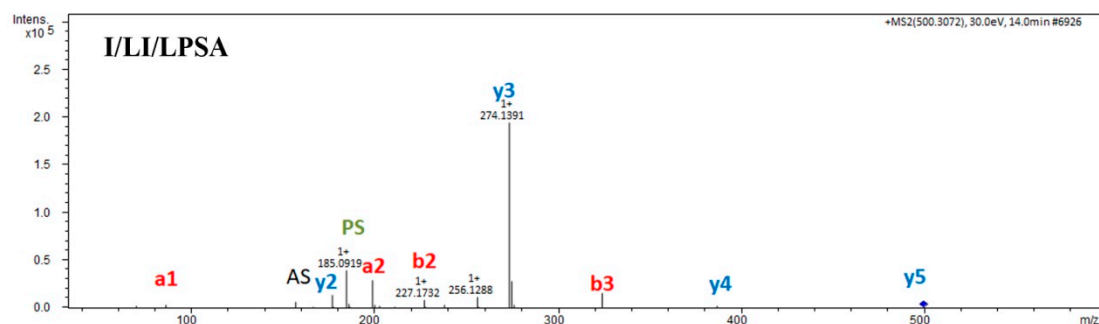

Supplementary Figure 105. Mass spectra and de novo sequencing analysis of I/LI/LPSA

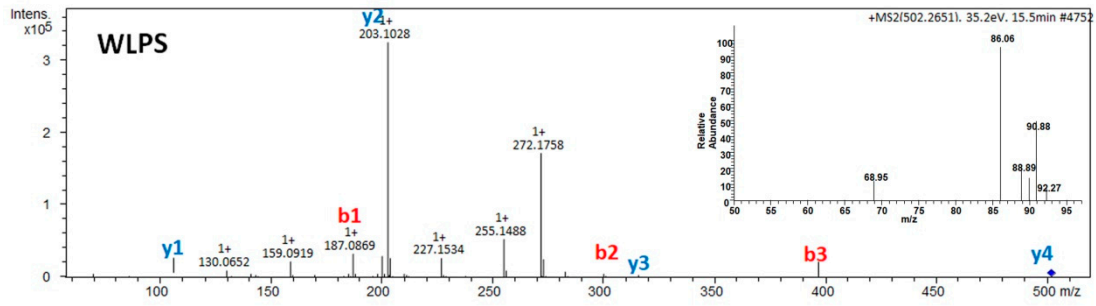

Supplementary Figure 106. Mass spectra and de novo sequencing analysis of WLPS

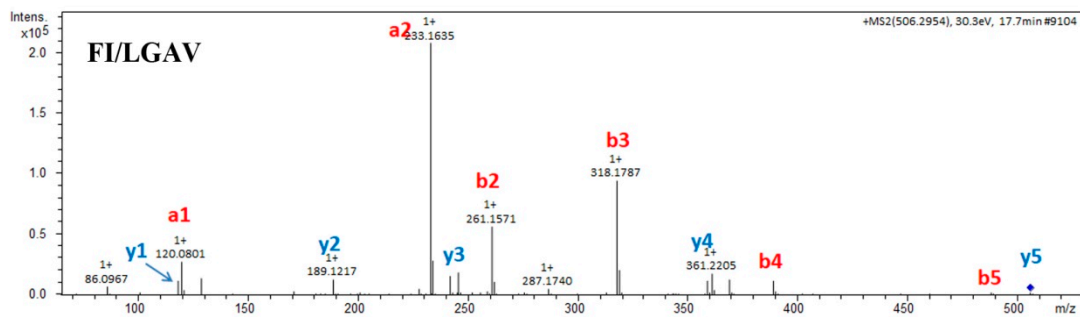

Supplementary Figure 107. Mass spectra and de novo sequencing analysis of FI/LGAV

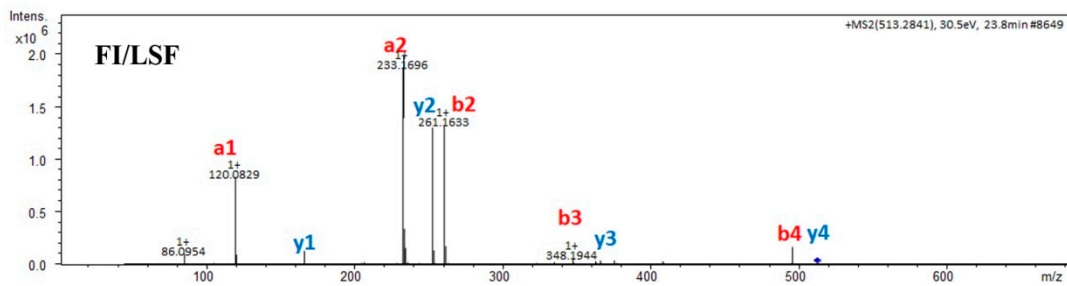

Supplementary Figure 108. Mass spectra and de novo sequencing analysis of FI/LSF

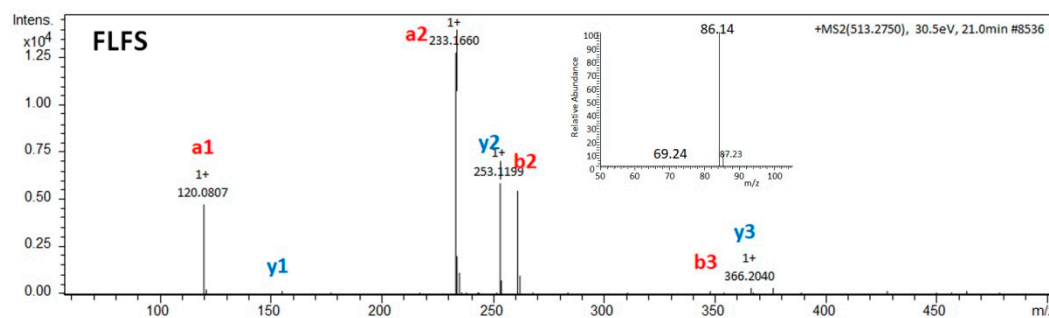

Supplementary Figure 109. Mass spectra and de novo sequencing analysis of  
FLFS

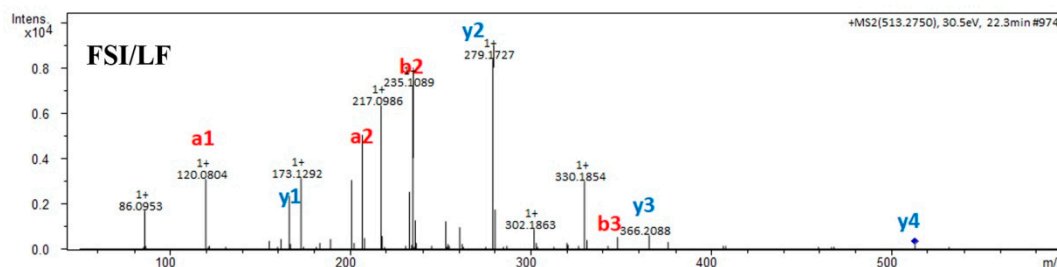

Supplementary Figure 110. Mass spectra and de novo sequencing analysis of  
FSI/LF

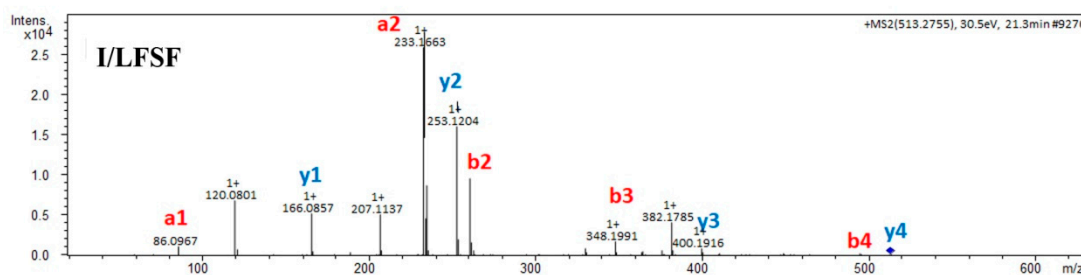

Supplementary Figure 111. Mass spectra and de novo sequencing analysis of  
I/LFSF

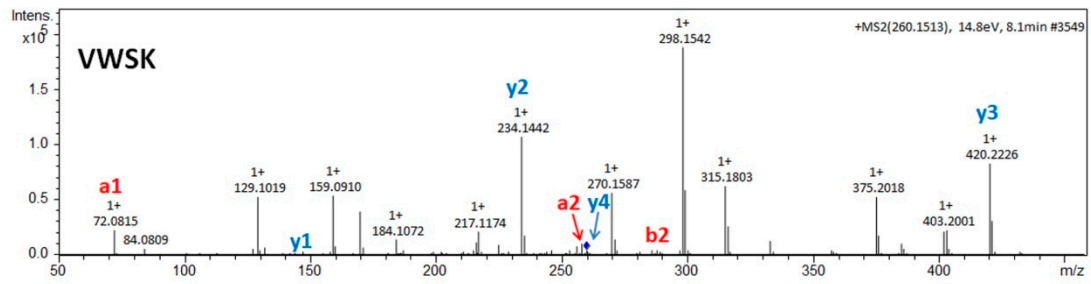

Supplementary Figure 112. Mass spectra and de novo sequencing analysis of  
VWSK

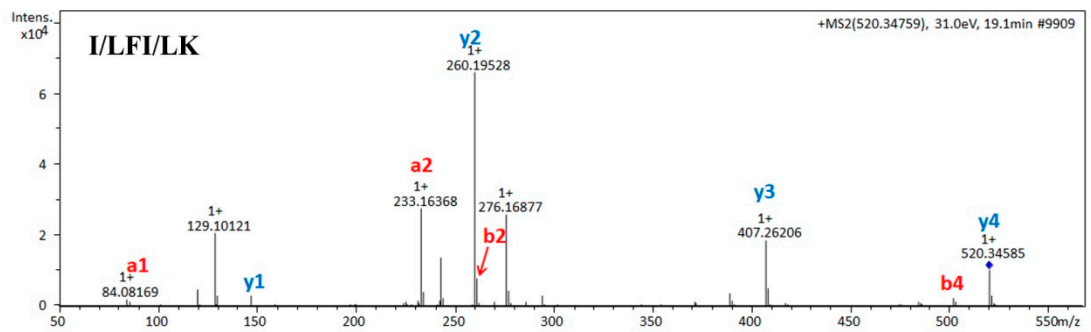

Supplementary Figure 113. Mass spectra and de novo sequencing analysis of  
I/LFI/LK

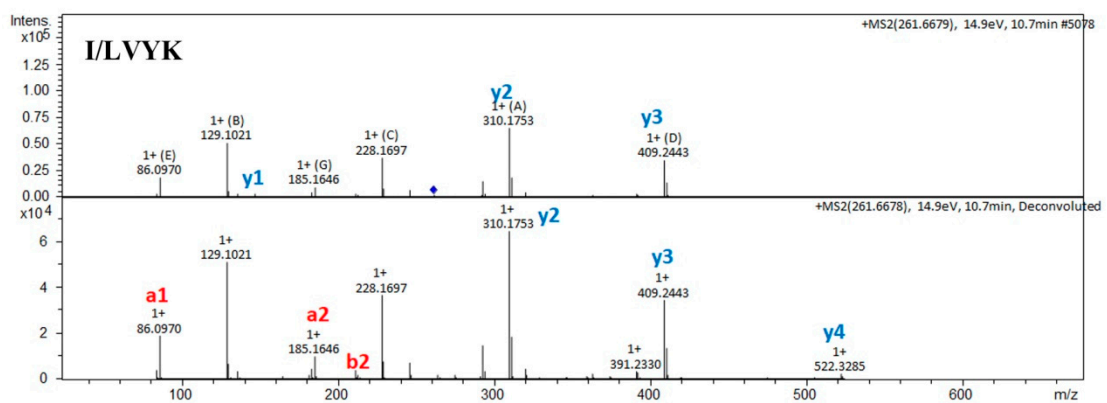

Supplementary Figure 114. Mass spectra and de novo sequencing analysis of  
I/LVYK

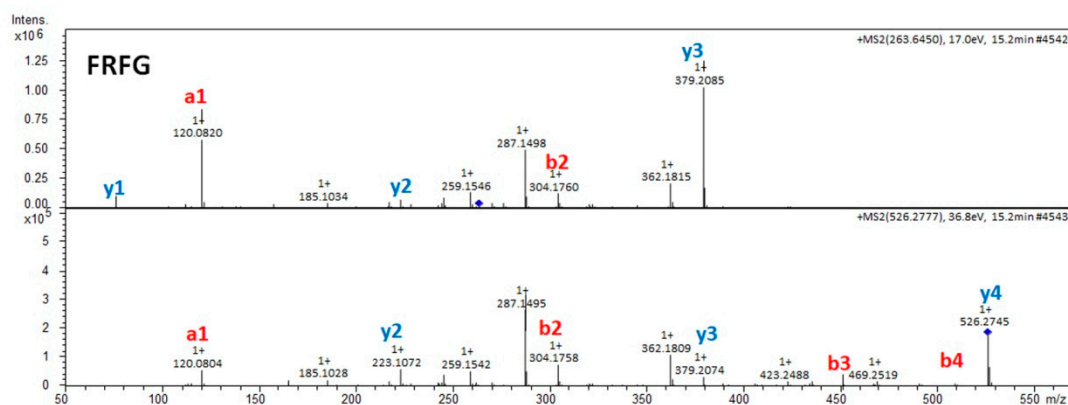

Supplementary Figure 115. Mass spectra and de novo sequencing analysis of  
FRFG

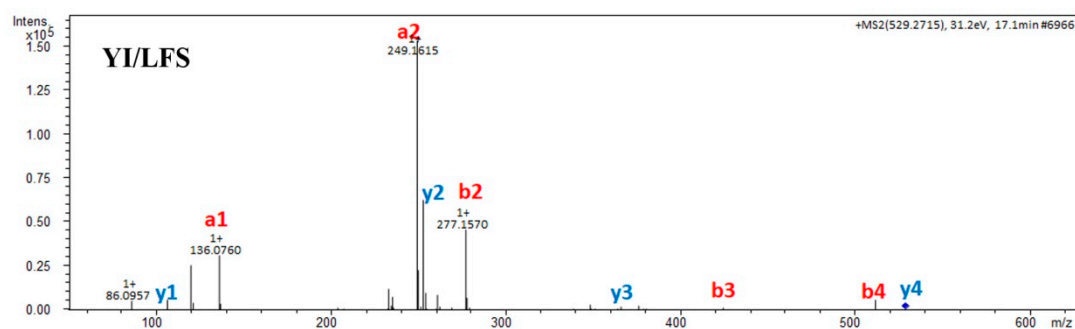

Supplementary Figure 116. Mass spectra and de novo sequencing analysis of  
YI/LFS

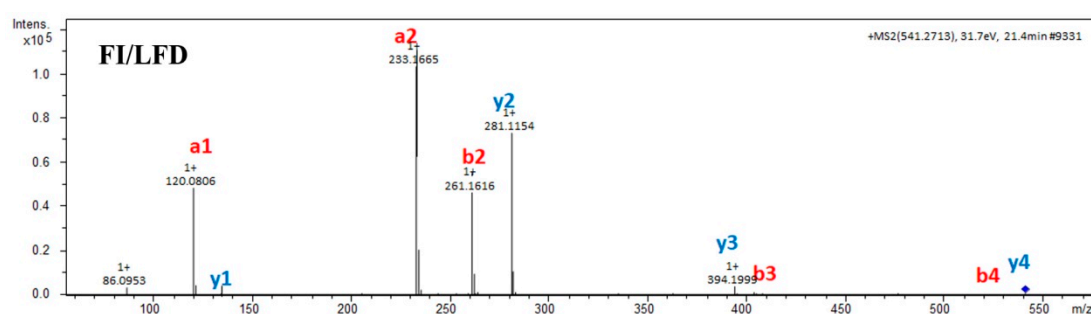

Supplementary Figure 117. Mass spectra and de novo sequencing analysis of  
FI/LFD

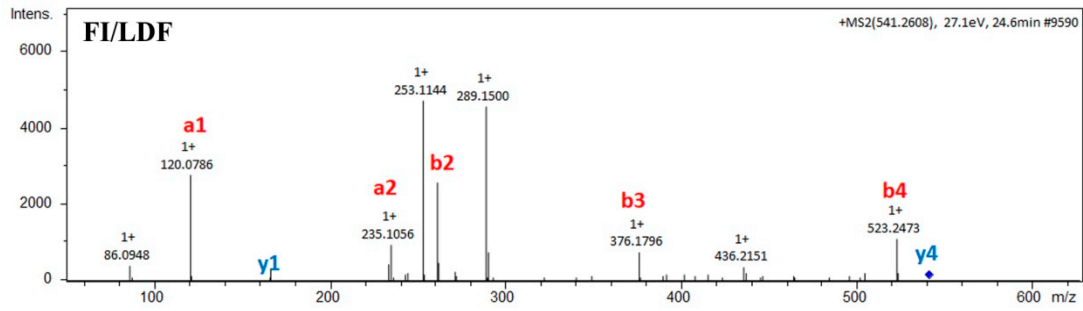

Supplementary Figure 118. Mass spectra and de novo sequencing analysis of  
FI/LDF

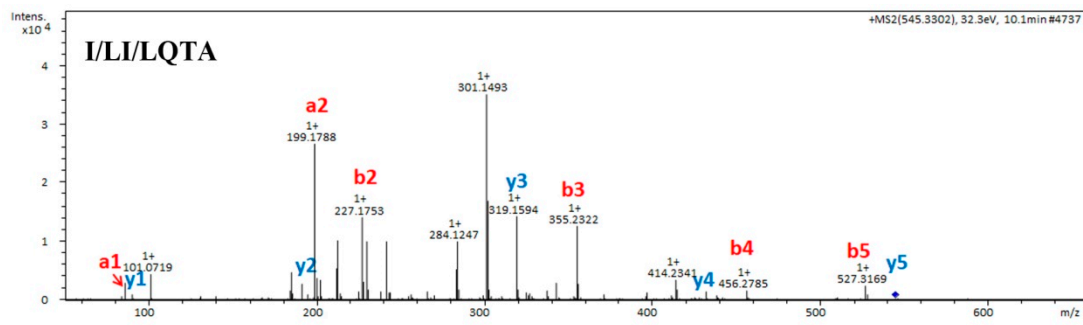

Supplementary Figure 119. Mass spectra and de novo sequencing analysis of  
I/LI/LQTA

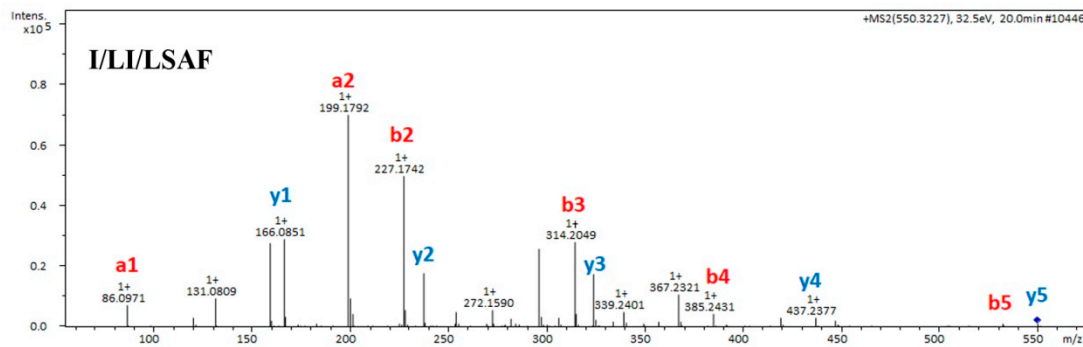

Supplementary Figure 120. Mass spectra and de novo sequencing analysis of  
I/LI/LSAF

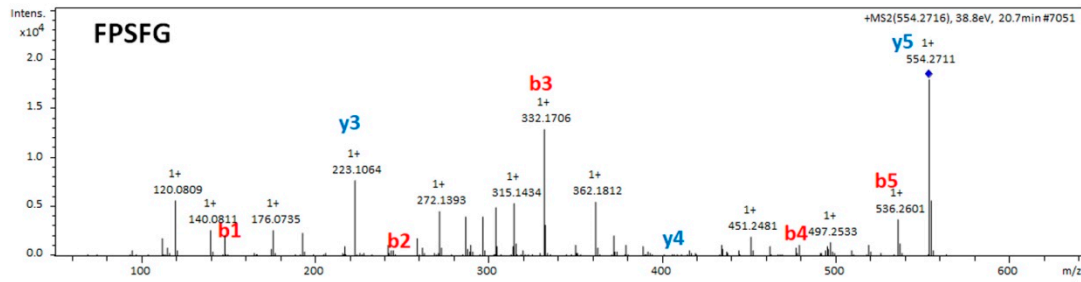

Supplementary Figure 121. Mass spectra and de novo sequencing analysis of FPSFG

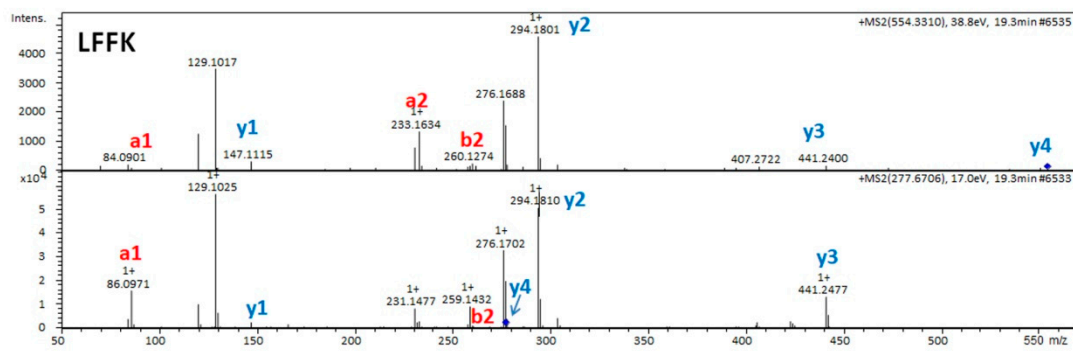

Supplementary Figure 122. Mass spectra and de novo sequencing analysis of LFFK

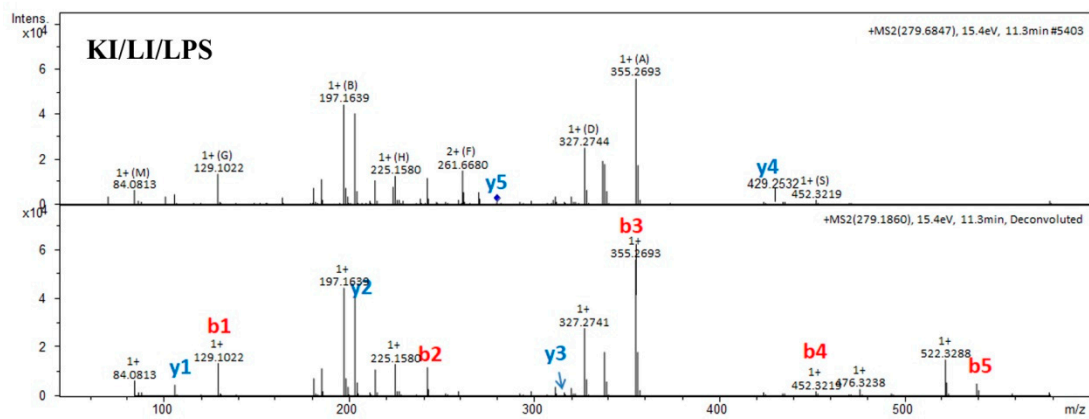

Supplementary Figure 123. Mass spectra and de novo sequencing analysis of KI/LI/LPS

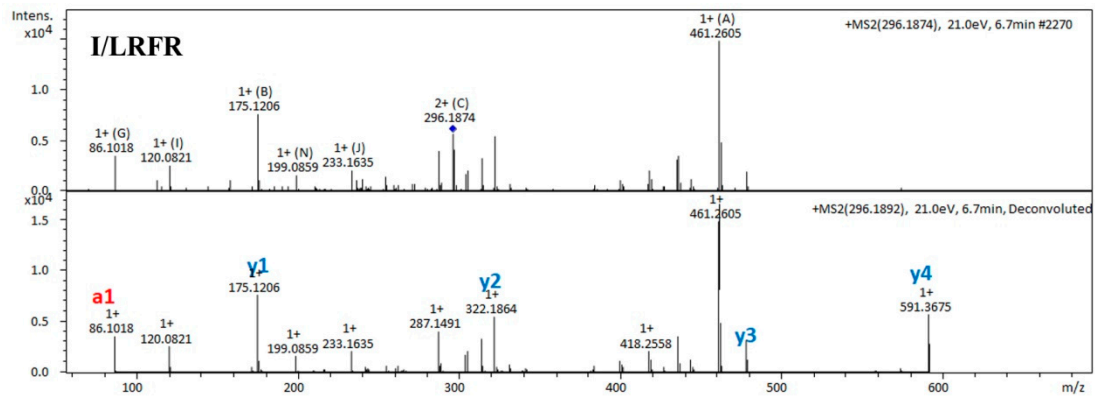

Supplementary Figure 124. Mass spectra and de novo sequencing analysis of I/LRFR

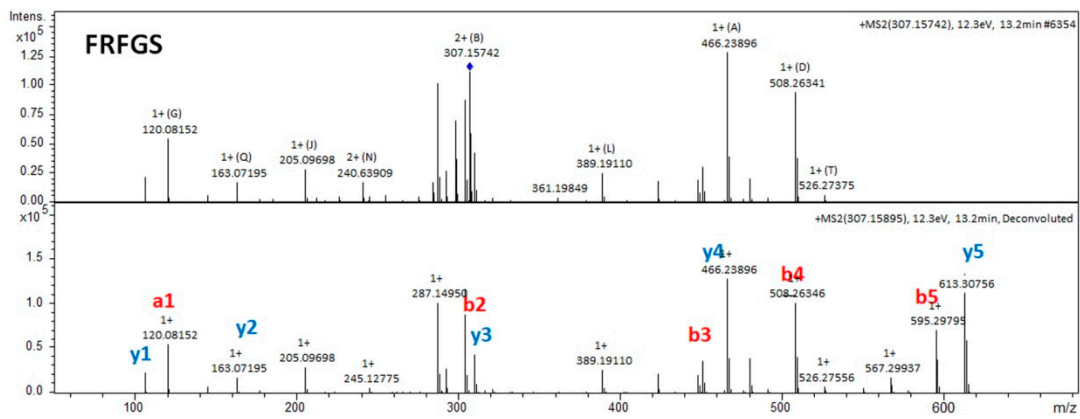

Supplementary Figure 125. Mass spectra and de novo sequencing analysis of FRFGS

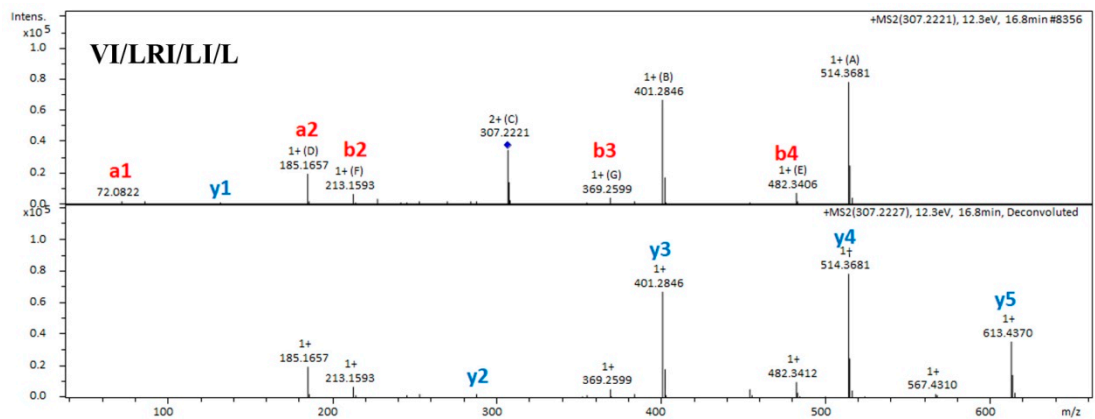

Supplementary Figure 126. Mass spectra and de novo sequencing analysis of VI/LRI/LI/L



# VI/LRI/LI/L

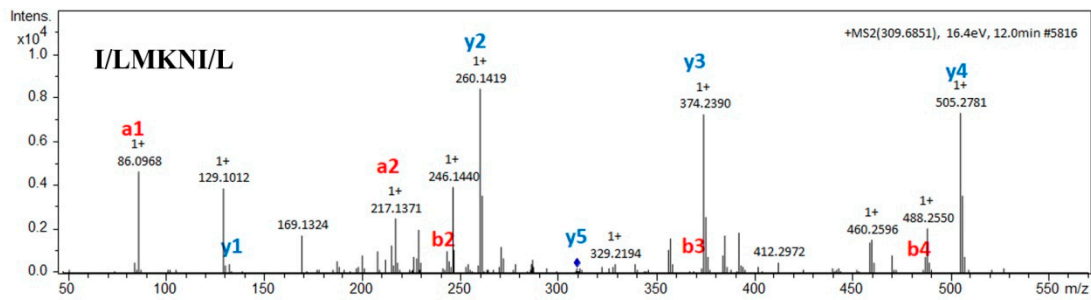

Supplementary Figure 127. Mass spectra and de novo sequencing analysis of

# I/LMKNI/L

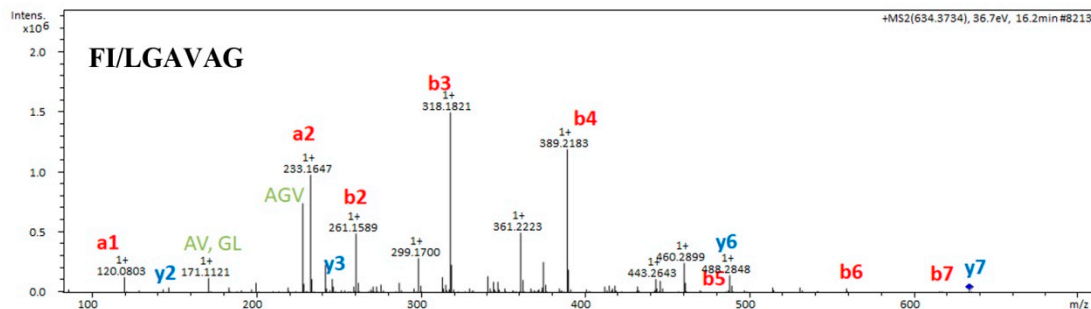

Supplementary Figure 128. Mass spectra and de novo sequencing analysis of

# FI/LGAVAG

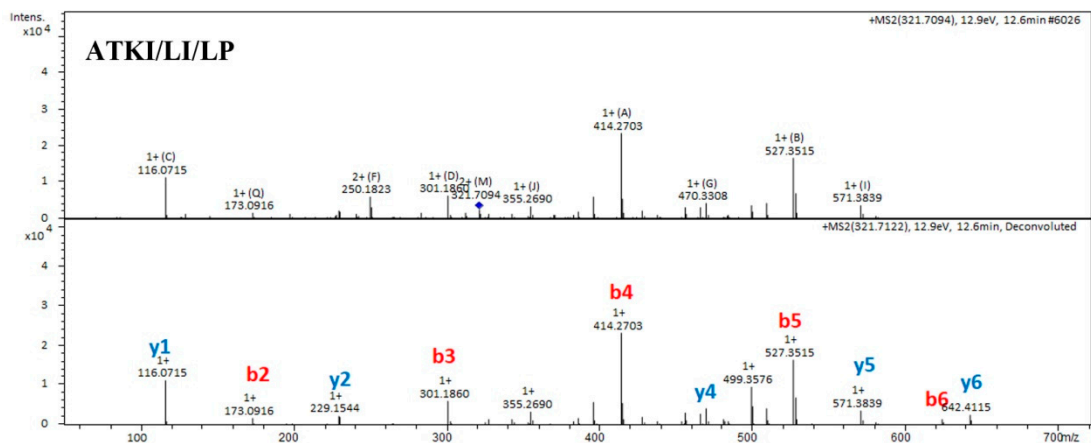

Supplementary Figure 129. Mass spectra and de novo sequencing analysis of

# ATKI/LI/LP

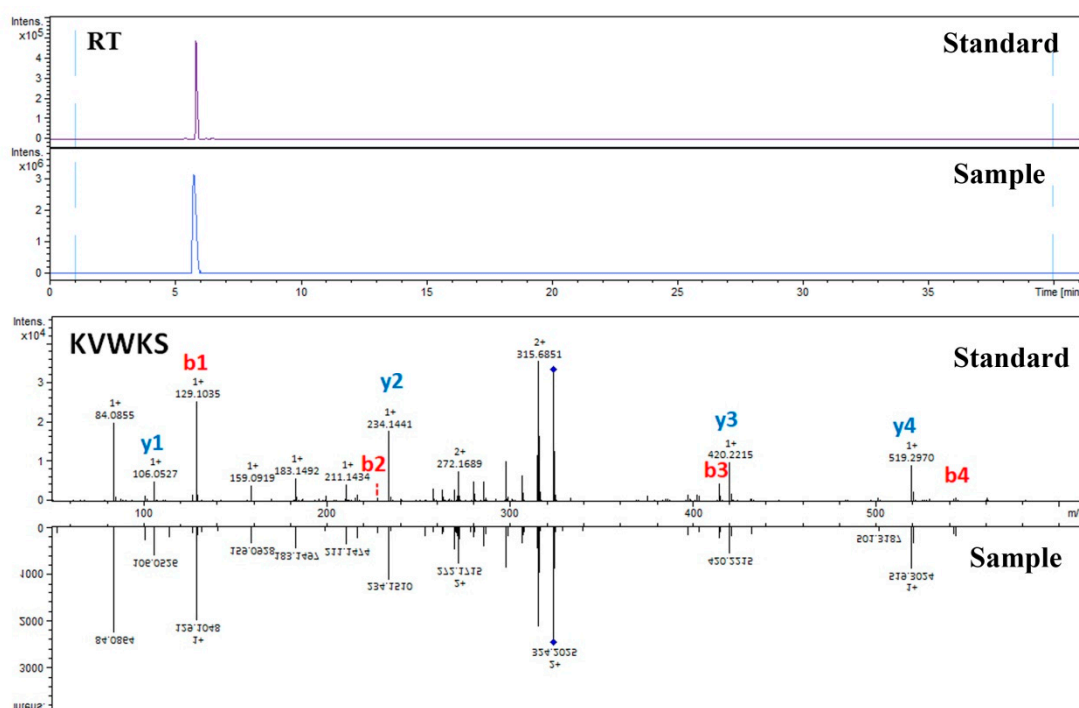

Supplementary Figure 130. Mass spectra and de novo sequencing analysis of KVVWS

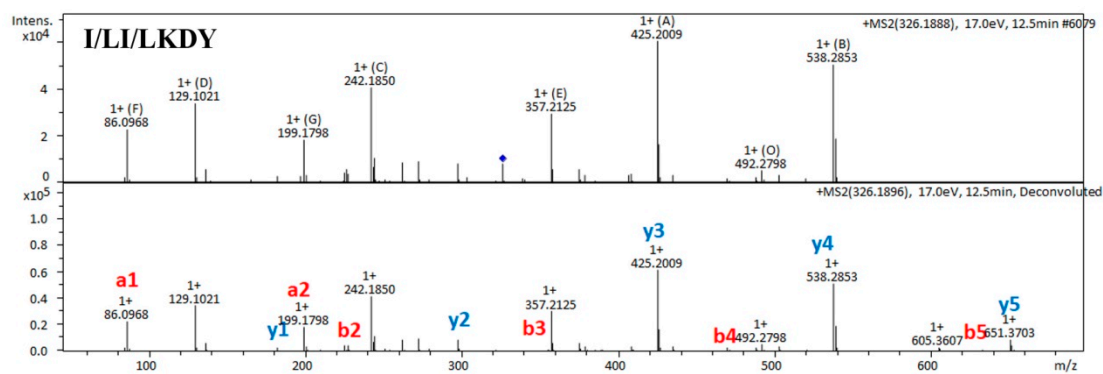

Supplementary Figure 131. Mass spectra and de novo sequencing analysis of I/LI/LKDY

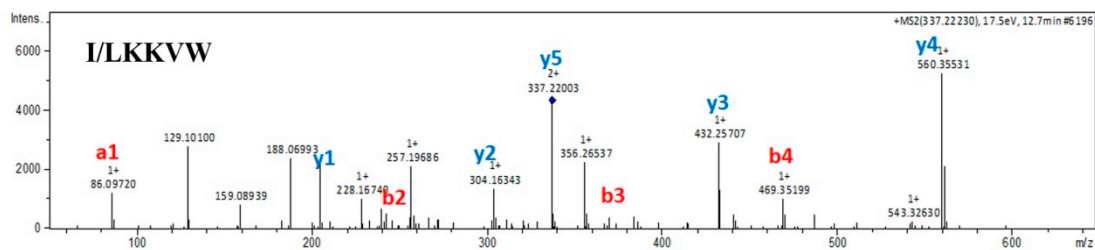

Supplementary Figure 132. Mass spectra and de novo sequencing analysis of  
I/LKKVW

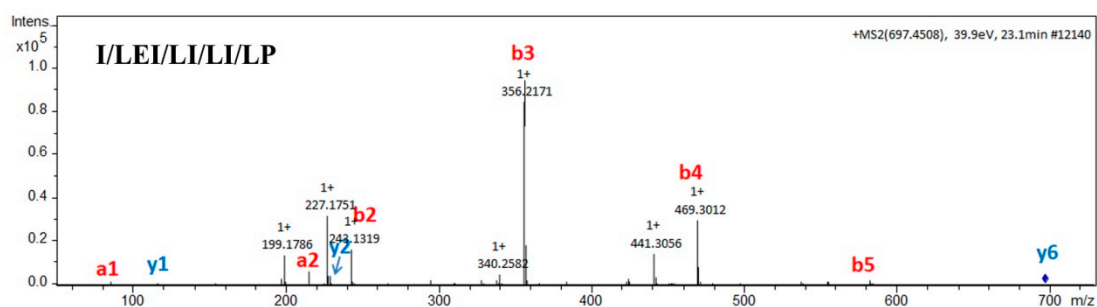

Supplementary Figure 133. Mass spectra and de novo sequencing analysis of  
I/LEI/LI/LI/LP

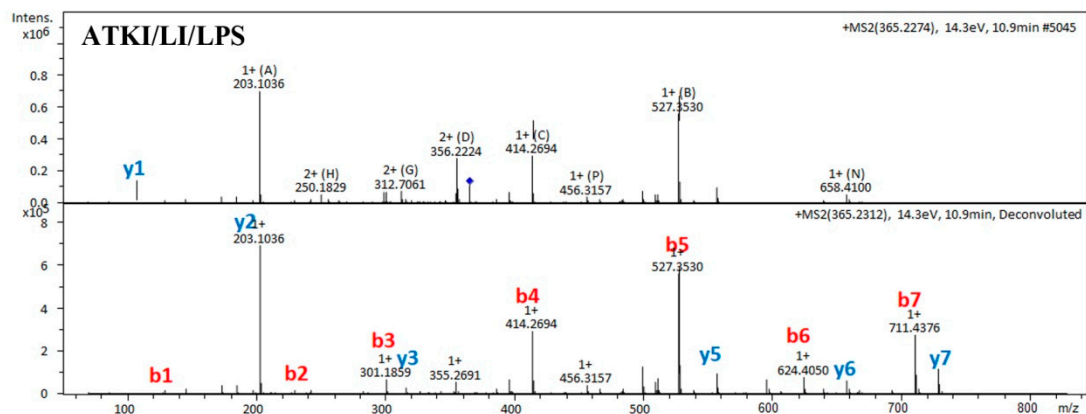

Supplementary Figure 134. Mass spectra and de novo sequencing analysis of  
ATK I/LI/LPS

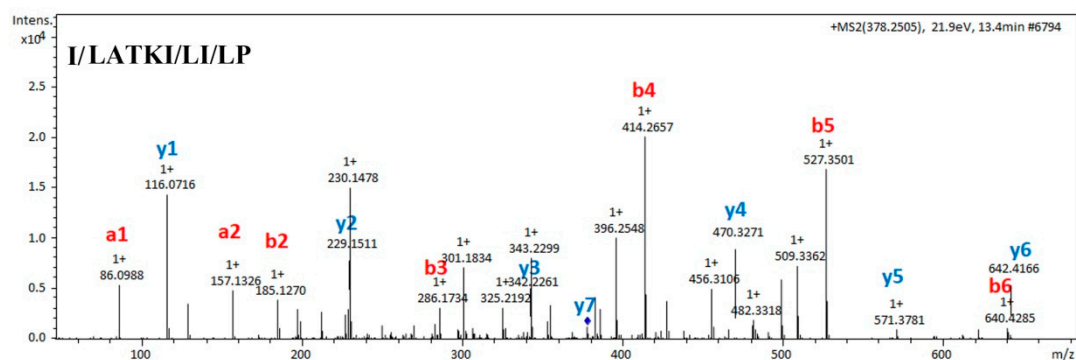

Supplementary Figure 135. Mass spectra and de novo sequencing analysis of  
I/LATK I/LI/LP

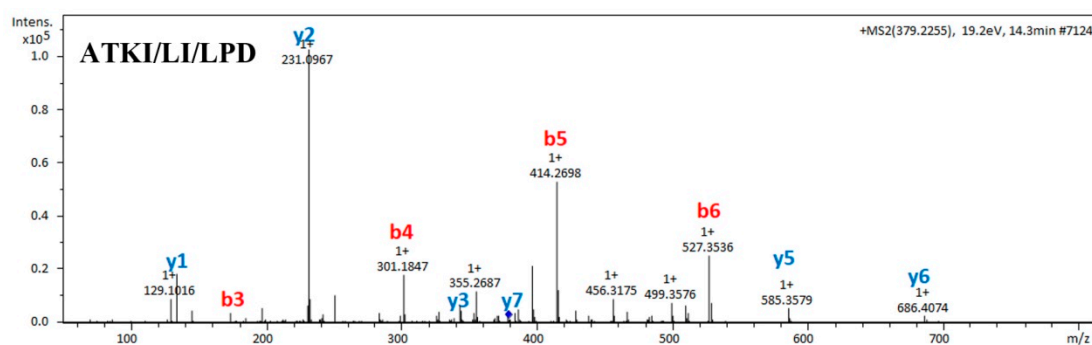

Supplementary Figure 136. Mass spectra and de novo sequencing analysis of  
ATK I/LI/LPD

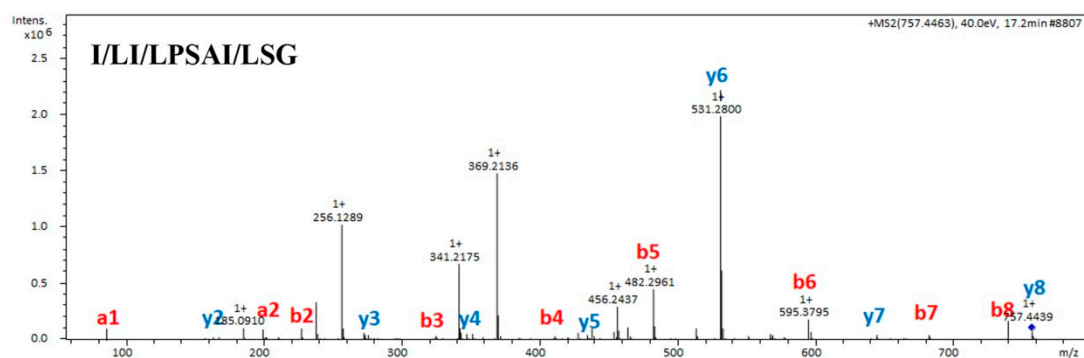

Supplementary Figure 137. Mass spectra and de novo sequencing analysis of  
I/LI/LPSAI/LSG

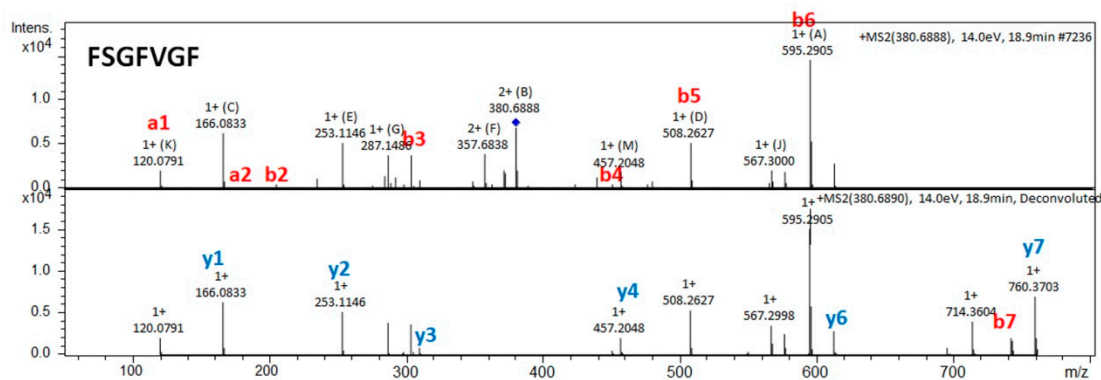

Supplementary Figure 138. Mass spectra and de novo sequencing analysis of

ESGFVGF

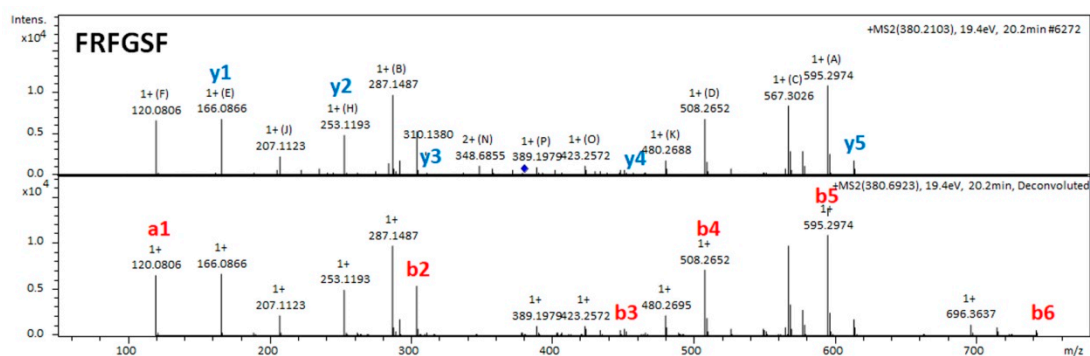

Supplementary Figure 139. Mass spectra and de novo sequencing analysis of

FRFGSF

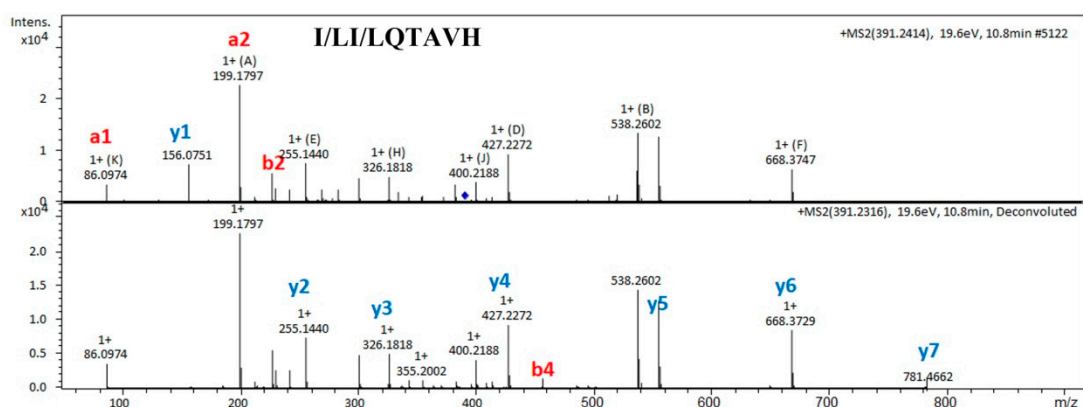

Supplementary Figure 140. Mass spectra and de novo sequencing analysis of

I/LI/LQTAVH

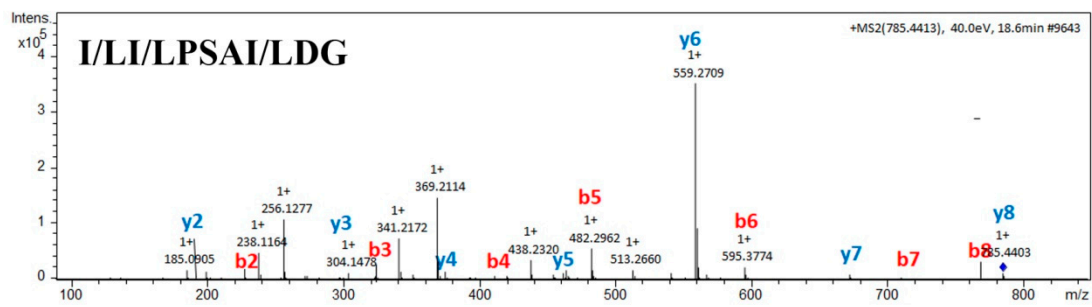

Supplementary Figure 141. Mass spectra and de novo sequencing analysis of  
I/LI/LPSAI/LDG

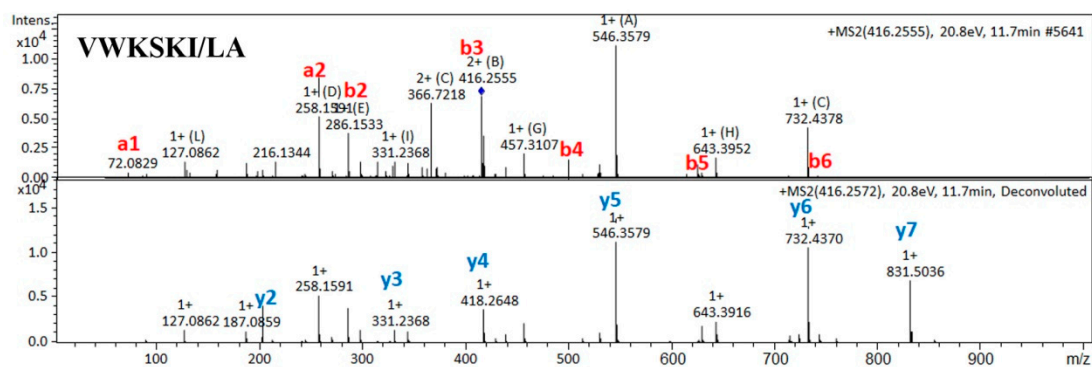

Supplementary Figure 142. Mass spectra and de novo sequencing analysis of  
VWKSKI/LA

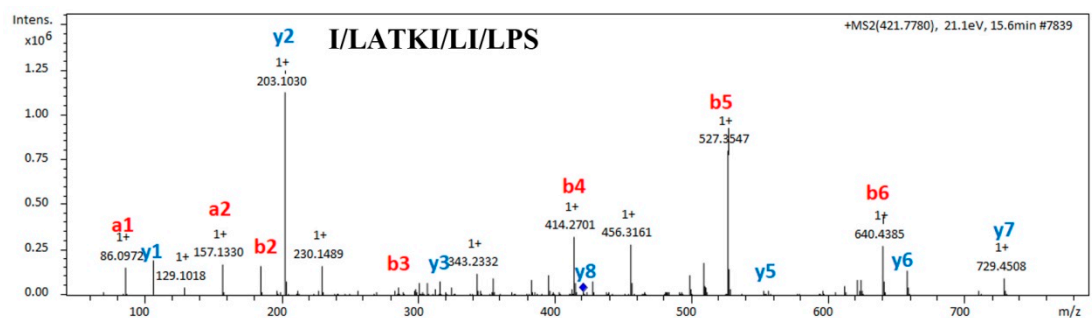

Supplementary Figure 143. Mass spectra and de novo sequencing analysis of  
I/LATKI/LI/LPS

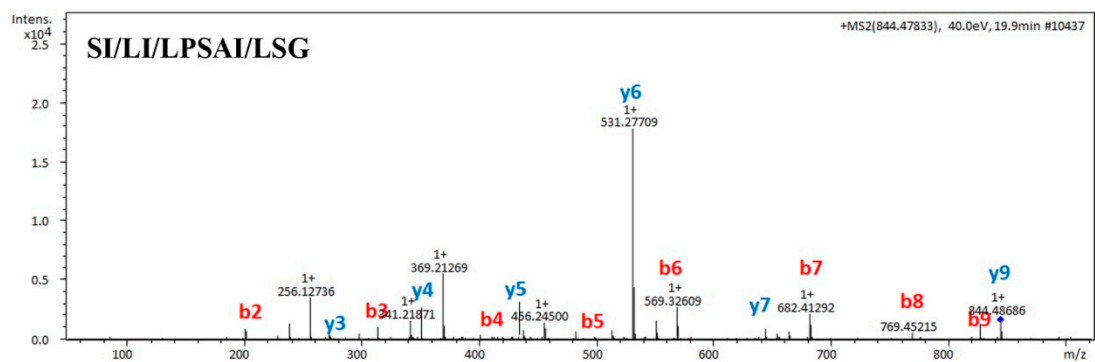

Supplementary Figure 144. Mass spectra and de novo sequencing analysis of  
SI/LI/LPSAI/LSG

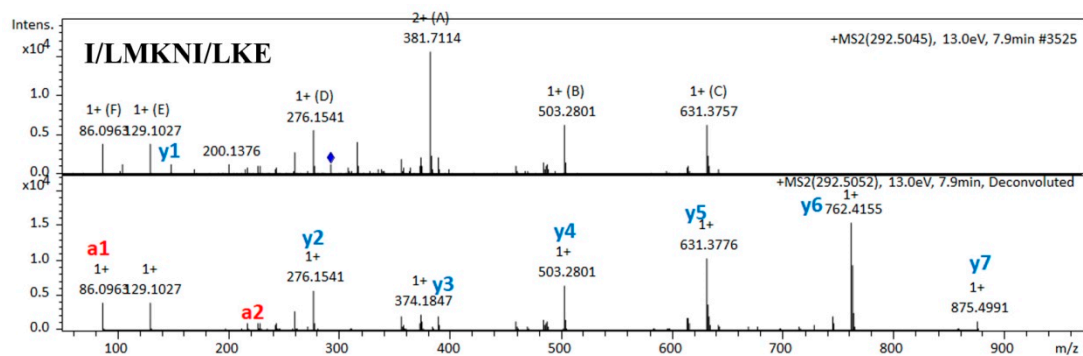

Supplementary Figure 144. Mass spectra and de novo sequencing analysis of  
I/LMKNI/LKE



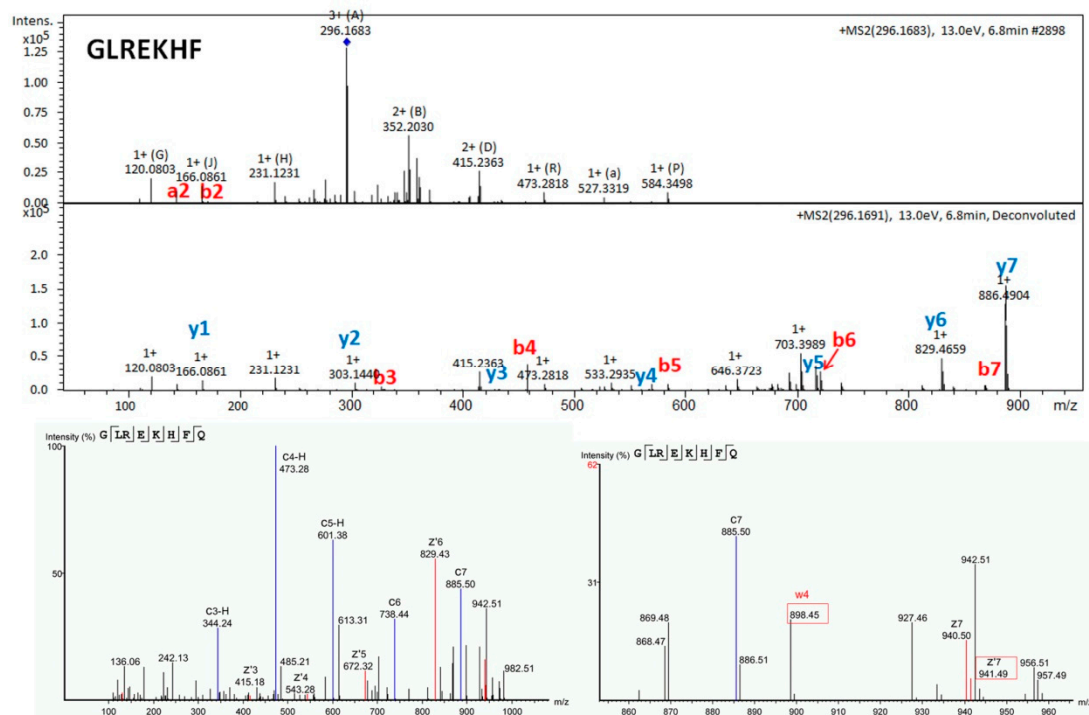

Supplementary Figure 146. Mass spectra and de novo sequencing analysis of  
GLREKHF

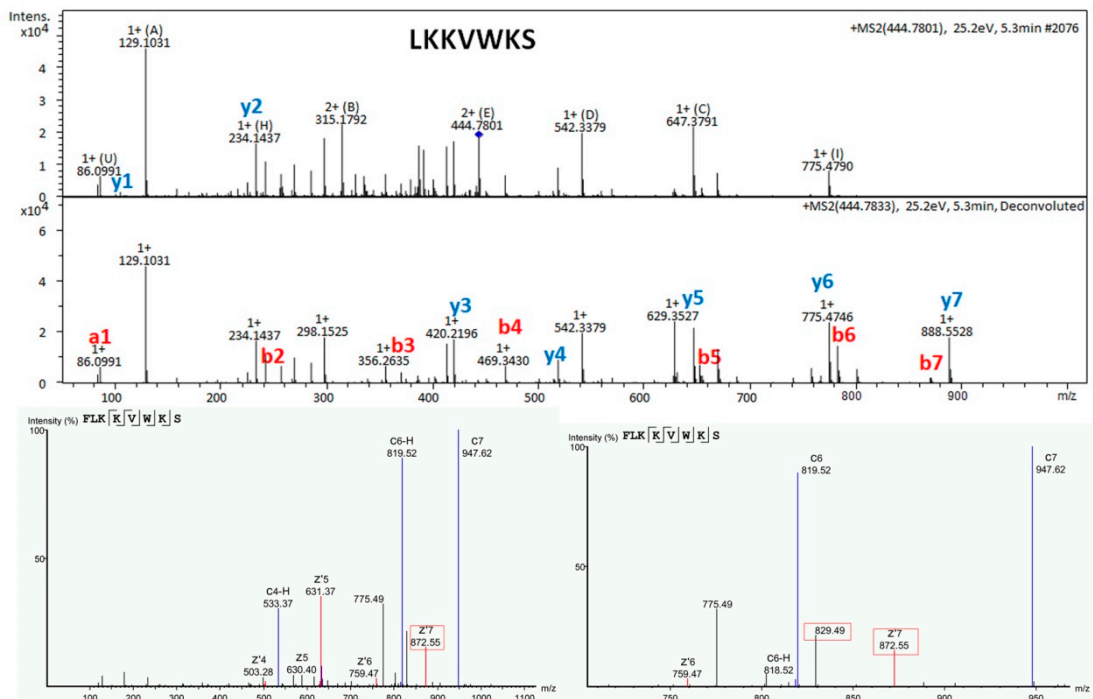

Supplementary Figure 147. Mass spectra and de novo sequencing analysis of  
LKKVWKS



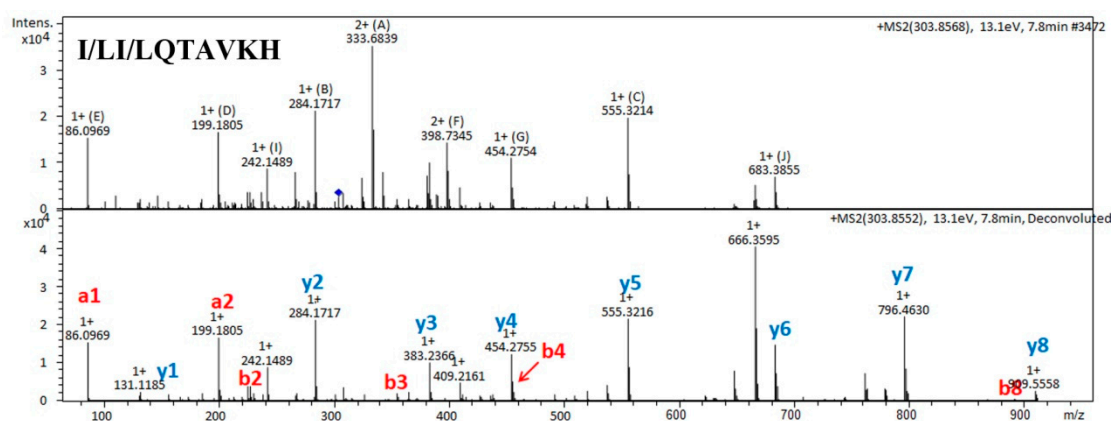

Supplementary Figure 148. Mass spectra and de novo sequencing analysis of  
I/LI/LQTAVKH

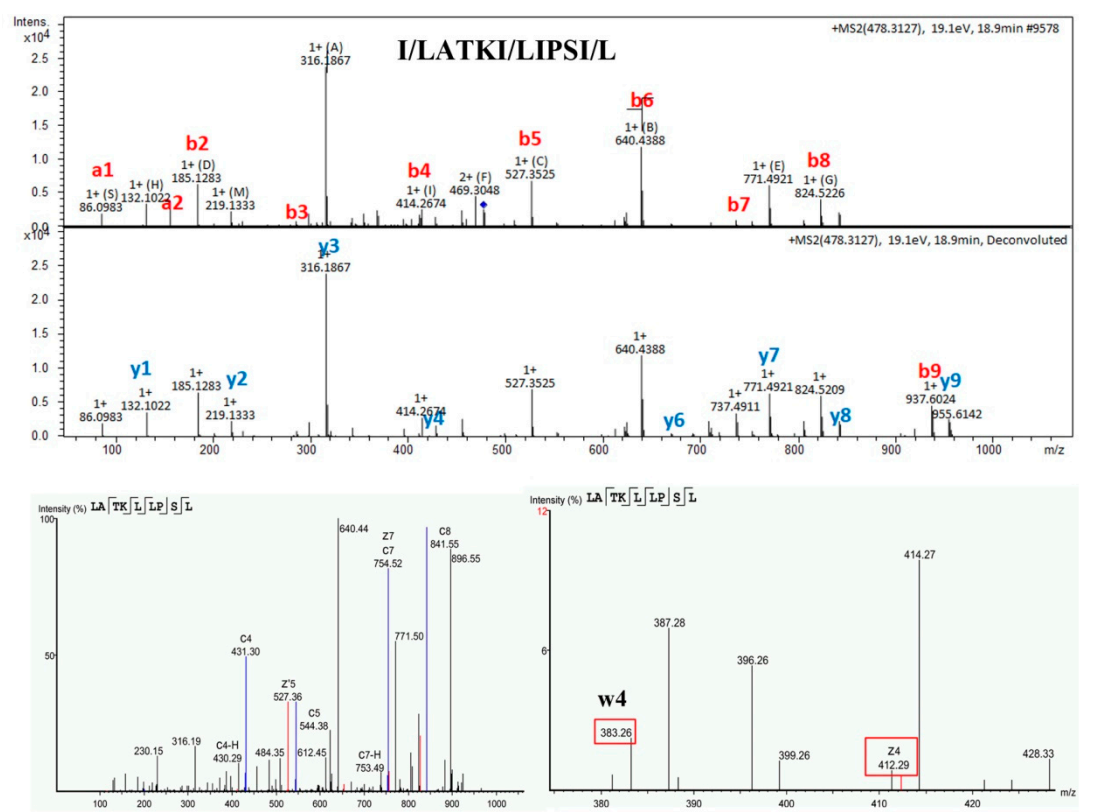

Supplementary Figure 149. Mass spectra and de novo sequencing analysis of  
I/LATKI/LIPSI/L



## GI/LREKHFQ

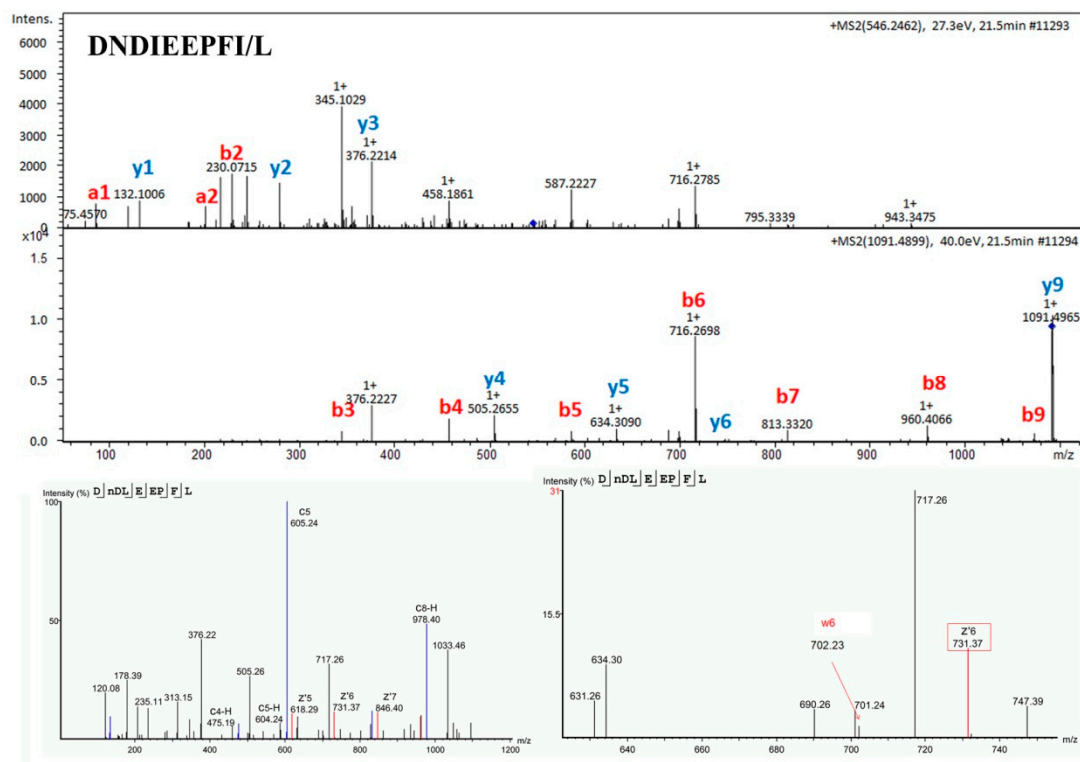

Supplementary Figure 152. Mass spectra and de novo sequencing analysis of

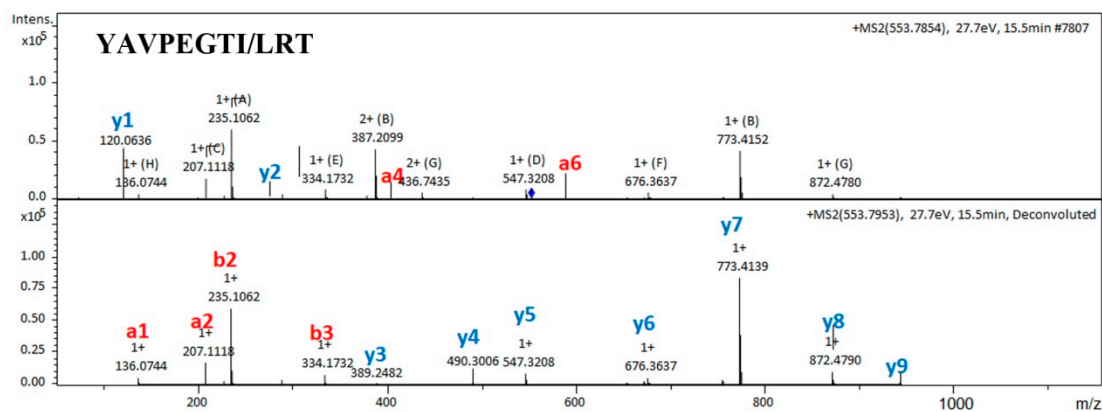

Supplementary Figure 153. Mass spectra and de novo sequencing analysis of

## YAVPEGTI/LRT

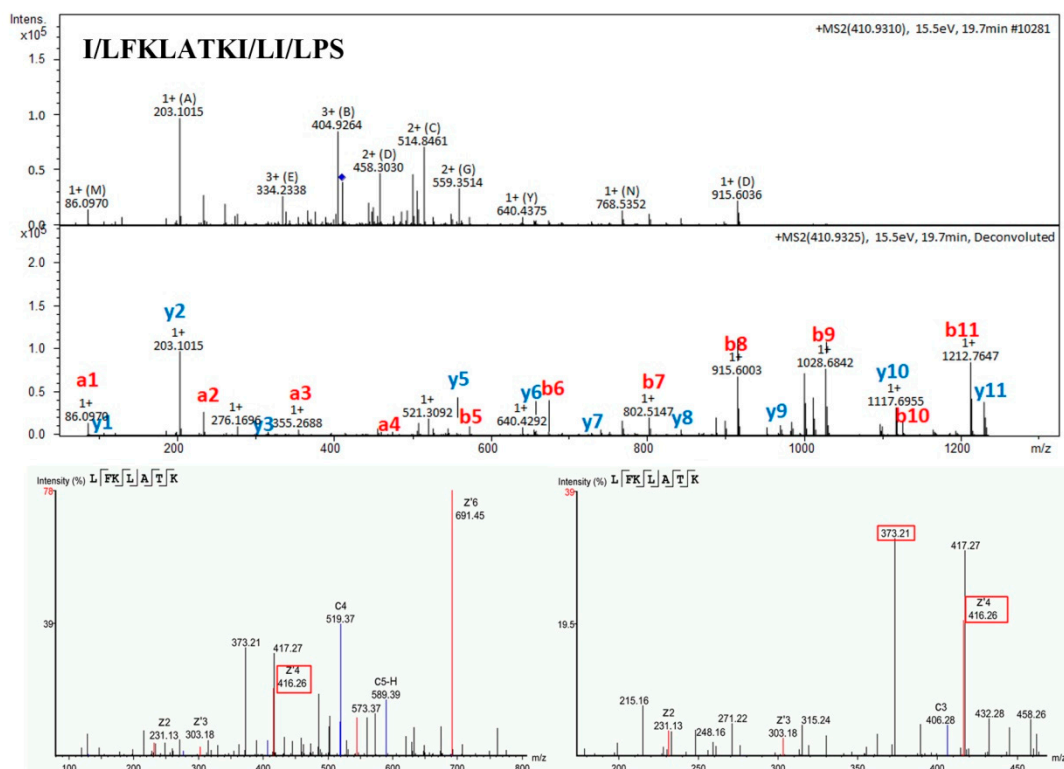

Supplementary Figure 154. Mass spectra and de novo sequencing analysis of  
I/LFKLATKI/LI/LPS

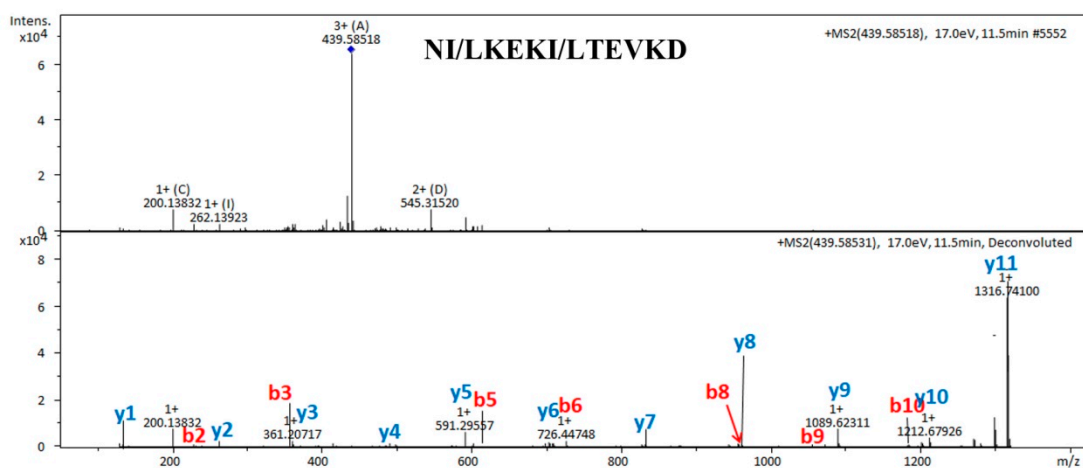

Supplementary Figure 155. Mass spectra and de novo sequencing analysis of  
NI/LKEKI/LTEVKD

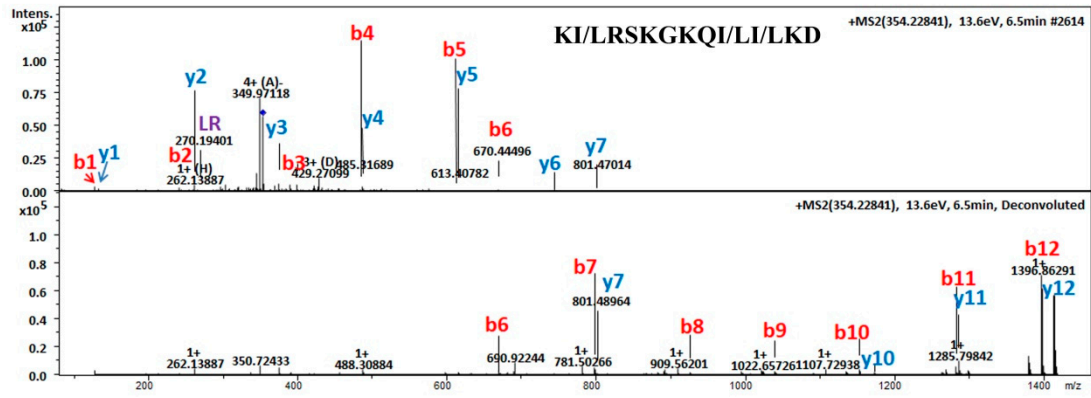

Supplementary Figure 156. Mass spectra and de novo sequencing analysis of  
KI/LRSGKKQI/LI/LKD
